# Supplementary material for: Exploring the efficacy of psychotherapies for depression: a multiverse meta-analysis
Source: PubMed Central journal article supplement (PMC10035781; doi:10.1136/bmjment-2022-300626), 2023-03-13
Supplement: bmjment-2022-300626supp001.pdf [file bmjment-2022-300626supp001.pdf]

## SUPPLEMENTARY MATERIAL TABLE OF CONTENTS

### eTables

- eTable 1 Detailed description of all included primary studies
- eTable 2 Summary characteristics of included primary studies
- eTable 3 Distribution of summary effect size estimates for Which factor: Control condition
- eTable 4 Distribution of summary effect size estimates for Which factor: Diagnosis
- eTable 5 Distribution of summary effect size estimates for Which factor: Format
- eTable 6 Distribution of summary effect size estimates for Which factor: Method
- eTable 7 Distribution of summary effect size estimates for Which factor: Type
- eTable 8 Distribution of summary effect size estimates for Which factor: Risk of bias
- eTable 9 Distribution of summary effect size estimates for Which factor: Target Group
- eTable 10 Different estimators for effect size-dependency
- eTable 11 Sensitivity analyses for multiverse size

### eFigures

- eFigure 1 Average effect size estimates for Which factor: Control condition
- eFigure 2 Average effect size estimates for Which factor: Diagnosis
- eFigure 3 Average effect size estimates for Which factor: Format
- eFigure 4 Average effect size estimates for Which factor: Method
- eFigure 5 Average effect size estimates for Which factor: Type
- eFigure 6 Average effect size estimates for Which factor: Risk of bias
- eFigure 7 Average effect size estimates for Which factor: Target Group
- eFigure 8 Inferential specification curve plot against a simulated clinically relevant effect size
- eFigure 9 Sensitivity analyses for multiverse size

### eMethods

- eMethods 1. Search strings for PubMed.
- eMethods 2. Detailed list of Which Factors.
- eMethods 3. Deviations from protocol.

**eTable 1 Detailed description of all included primary studies**

| Study                             | Target group         | Intervention              | Format             | Control     | Diagnosis              | Risk of bias | Region        | N   | Hedges' g | SE    |
|-----------------------------------|----------------------|---------------------------|--------------------|-------------|------------------------|--------------|---------------|-----|-----------|-------|
| Aagaard, 2017 <sup>1</sup>        | Adults               | CBT-Based                 | Group              | CAU         | Diagnosis              | Some Concern | Europe        | 75  | 0.0000    | 0.230 |
| Abas, 2018 <sup>2</sup>           | General Medical      | CBT-Based                 | Individual         | CAU         | Cut-Off Score          | Low          | Other Region  | 28  | 0.6300    | 0.390 |
| Ahmadpanah, 2016 <sup>3</sup>     | General Medical      | CBT-Based & Not-CBT-Based | Individual & Group | CAU         | Subclinical Depression | Some Concern | Other Region  | 30  | 1.6725    | 0.425 |
| Alexopoulos, 2016 <sup>4</sup>    | General Medical      | CBT-Based                 | Individual         | Other       | Diagnosis              | Some Concern | North America | 168 | -0.1964   | 0.175 |
| Afonso, 2009 <sup>5</sup>         | Older Adults         | Not-CBT-Based             | Individual         | Other & CAU | Cut-Off Score          | Some Concern | Europe        | 60  | 2.420     | 0.345 |
| Alhusen, 2021 <sup>6</sup>        | Perinatal Depression | CBT-Based                 | Group              | CAU         | Cut-Off Score          | Some Concern | North America | 60  | 1.460     | 0.290 |
| Allart Van Dam, 2003 <sup>7</sup> | Adults               | CBT-Based                 | Group              | CAU         | Subclinical Depression | Some Concern | Europe        | 102 | 0.5700    | 0.210 |
| Amani, 2021 <sup>8</sup>          | Perinatal Depression | CBT-Based                 | Group              | WL          | Cut-Off Score          | Some Concern | North America | 38  | 1.310     | 0.360 |
| Ammerman, 2013 <sup>9</sup>       | Perinatal Depression | CBT-Based                 | Individual         | CAU         | Diagnosis              | Some Concern | North America | 93  | 0.8797    | 0.228 |
| Andersson, 2005 <sup>10</sup>     | Adults               | CBT-Based                 | Guided Self-Help   | Other       | Cut-Off Score          | Some Concern | Europe        | 85  | 0.8700    | 0.230 |
| Araya, 2021 <sup>11</sup>         | General Medical      | CBT-Based                 | Guided Self-Help   | CAU         | Cut-Off Score          | Low          | Other Region  | 657 | 0.315     | 0.095 |
| Arean, 1993 <sup>12</sup>         | Older Adults         | CBT-Based & Not-CBT-Based | Group              | WL          | Diagnosis              | Some Concern | North America | 45  | 0.8756    | 0.397 |
| Arjadi, 2018 <sup>13</sup>        | Adults               | CBT-Based                 | Guided Self-Help   | Other       | Diagnosis              | Low          | Other Region  | 276 | 0.4282    | 0.125 |
| Ayen, 2004 <sup>14</sup>          | Other Target Groups  | CBT-Based & Not-CBT-Based | Group              | WL          | Diagnosis              | Some Concern | Europe        | 26  | 2.4581    | 0.606 |
| Barber, 2012 <sup>15</sup>        | Adults               | Not-CBT-Based             | Individual         | Other       | Diagnosis              | Some Concern | North America | 102 | 0.0769    | 0.260 |
| Barnhofer, 2009 <sup>16</sup>     | Adults               | CBT-Based                 | Group              | CAU         | Diagnosis              | Low          | Europe        | 28  | 1.0423    | 0.530 |

| Study                           | Target group        | Intervention  | Format                           | Control    | Diagnosis     | Risk of bias        | Region        | N   | Hedges' g | SE    |
|---------------------------------|---------------------|---------------|----------------------------------|------------|---------------|---------------------|---------------|-----|-----------|-------|
| Barrett, 2001 <sup>17</sup>     | Adults              | CBT-Based     | Individual                       | Other      | Diagnosis     | Low                 | North America | 66  | 0.1542    | 0.280 |
| Baumeister, 2021 <sup>18</sup>  | General Medical     | CBT-Based     | Guided Self-Help                 | CAU        | Diagnosis     | Low                 | Europe        | 209 | 0.313     | 0.140 |
| Baumgartner, 2021 <sup>19</sup> | Adults              | CBT-Based     | Guided Self-Help                 | WL         | Cut-Off Score | Low                 | Europe        | 462 | 0.300     | 0.090 |
| Beach, 1992 <sup>20</sup>       | Other Target Groups | CBT-Based     | Other Formats & Individual       | WL         | Diagnosis     | Some Concern        | North America | 30  | 1.1615    | 0.400 |
| Bedard, 2014 <sup>21</sup>      | General Medical     | CBT-Based     | Group                            | WL         | Cut-Off Score | Some Concern        | North America | 75  | 0.3517    | 0.233 |
| Beeber, 2010 <sup>22</sup>      | Other Target Groups | Not-CBT-Based | Individual                       | CAU        | Cut-Off Score | Some Concern        | North America | 70  | 0.8188    | 0.265 |
| Bendig, 2021 <sup>23</sup>      | General Medical     | CBT-Based     | Guided Self-Help                 | WL         | Cut-Off Score | Low                 | Europe        | 34  | 0.320     | 0.350 |
| Berger, 2011 <sup>24</sup>      | Adults              | CBT-Based     | Guided Self-Help & Other Formats | WL         | Diagnosis     | Low                 | Europe        | 51  | 0.8819    | 0.295 |
| Beutel, 2014 <sup>25</sup>      | General Medical     | Not-CBT-Based | Individual                       | CAU        | Diagnosis     | Low                 | Europe        | 156 | 0.5200    | 0.190 |
| Boele, 2018 <sup>26</sup>       | General Medical     | CBT-Based     | Guided Self-Help                 | WL         | Cut-Off Score | Low                 | Europe        | 53  | 0.6100    | 0.290 |
| Boeschoten, 2017 <sup>27</sup>  | General Medical     | CBT-Based     | Guided Self-Help                 | WL         | Cut-Off Score | Low                 | Europe        | 149 | 0.1880    | 0.187 |
| Bohlmeijer, 2011 <sup>28</sup>  | Adults              | CBT-Based     | Group                            | WL         | Cut-Off Score | Low                 | Europe        | 93  | 0.6000    | 0.210 |
| Bolton, 2003 <sup>29</sup>      | Adults              | Not-CBT-Based | Group                            | CAU        | Diagnosis     | Some Concern        | Other Region  | 258 | 1.1484    | 0.140 |
| Bower, 2021 <sup>30</sup>       | General Medical     | Not-CBT-Based | Group                            | WL & Other | Cut-Off Score | Some Concern        | North America | 166 | 0.145     | 0.160 |
| Bowman, 1995 <sup>31</sup>      | Adults              | CBT-Based     | Guided Self-Help                 | WL         | Cut-Off Score | Some Concern & High | North America | 20  | 0.9458    | 0.508 |
| Braun, 2021 <sup>32</sup>       | Other Target Groups | Not-CBT-Based | Guided Self-Help                 | Other      | Cut-Off Score | Low                 | Europe        | 340 | 0.280     | 0.110 |

| Study                          | Target group         | Intervention              | Format                                | Control    | Diagnosis              | Risk of bias | Region        | N   | Hedges' g | SE    |
|--------------------------------|----------------------|---------------------------|---------------------------------------|------------|------------------------|--------------|---------------|-----|-----------|-------|
| Brown, 1984 <sup>33</sup>      | Adults               | CBT-Based                 | Group & Individual & Guided Self-Help | WL         | Diagnosis              | Some Concern | North America | 28  | 0.3934    | 0.395 |
| Buhrman, 2015 <sup>34</sup>    | General Medical      | CBT-Based                 | Guided Self-Help                      | WL         | Cut-Off Score          | Low          | Europe        | 54  | 0.5730    | 0.340 |
| Buntrock, 2015 <sup>35</sup>   | Adults               | Not-CBT-Based             | Guided Self-Help                      | CAU        | Subclinical Depression | Low          | Europe        | 405 | 0.6455    | 0.113 |
| Burmaoğlu, 2021 <sup>36</sup>  | Other Target Groups  | CBT-Based & Not-CBT-Based | Group                                 | CAU        | Diagnosis              | Some Concern | Other Region  | 30  | 0.360     | 0.370 |
| Burns, 2007 <sup>37</sup>      | General Medical      | Not-CBT-Based             | Individual                            | CAU        | Cut-Off Score          | Low          | Europe        | 100 | 0.4000    | 0.220 |
| Burns, 2013 <sup>38</sup>      | Perinatal Depression | CBT-Based                 | Individual                            | CAU        | Cut-Off Score          | Low          | Europe        | 30  | 0.8731    | 0.403 |
| Carlbring, 2013 <sup>39</sup>  | Adults               | CBT-Based                 | Guided Self-Help                      | WL         | Diagnosis              | Low          | Europe        | 80  | 0.7712    | 0.303 |
| Carr, 2017 <sup>40</sup>       | Adults               | CBT-Based                 | Group                                 | CAU        | Diagnosis              | Some Concern | Europe        | 82  | 0.3367    | 0.220 |
| Carta, 2012 <sup>41</sup>      | Adults               | CBT-Based                 | Individual                            | CAU        | Diagnosis              | Some Concern | Europe        | 64  | 0.2500    | 0.250 |
| Casanas, 2012 <sup>42</sup>    | Adults               | CBT-Based                 | Group                                 | CAU        | Diagnosis              | Low          | Europe        | 234 | 0.3490    | 0.150 |
| Castonguay, 2004 <sup>43</sup> | Adults               | CBT-Based                 | Individual                            | WL         | Diagnosis              | Some Concern | North America | 22  | 1.6495    | 0.583 |
| Chan, 2012 <sup>44</sup>       | Adults               | CBT-Based & Not-CBT-Based | Group                                 | WL         | Diagnosis              | Some Concern | East Asia     | 33  | 1.1833    | 0.400 |
| Chan, 2013 <sup>45</sup>       | Older Adults         | Not-CBT-Based             | Individual                            | CAU        | Cut-Off Score          | Some Concern | East Asia     | 26  | 1.4300    | 0.440 |
| Chen, 2000 <sup>46</sup>       | Perinatal Depression | Not-CBT-Based             | Group                                 | CAU        | Cut-Off Score          | Some Concern | East Asia     | 60  | 0.6000    | 0.300 |
| Chesney, 2003 <sup>47</sup>    | General Medical      | Not-CBT-Based             | Group                                 | Other & WL | Subclinical Depression | Some Concern | North America | 87  | 0.0920    | 0.215 |
| Chiang, 2015 <sup>48</sup>     | Adults               | CBT-Based                 | Group                                 | CAU        | Diagnosis              | Some Concern | East Asia     | 62  | 4.0789    | 0.460 |
| Cho, 2008 <sup>49</sup>        | Perinatal Depression | CBT-Based                 | Individual                            | CAU        | Diagnosis              | Some Concern | East Asia     | 23  | 0.7876    | 0.515 |

| Study                         | Target group         | Intervention              | Format                     | Control | Diagnosis     | Risk of bias | Region        | N   | Hedges' g | SE    |
|-------------------------------|----------------------|---------------------------|----------------------------|---------|---------------|--------------|---------------|-----|-----------|-------|
| Choi, 2012 <sup>50</sup>      | Other Target Groups  | CBT-Based                 | Guided Self-Help           | WL      | Diagnosis     | Low          | Australia     | 63  | 0.5429    | 0.257 |
| Choi, 2014 <sup>51</sup>      | Older Adults         | CBT-Based                 | Individual & Other Formats | Other   | Cut-Off Score | Some Concern | North America | 68  | 0.4000    | 0.300 |
| Choi, 2020 <sup>52</sup>      | Other Target Groups  | CBT-Based                 | Other Formats              | Other   | Cut-Off Score | Some Concern | North America | 193 | 0.8415    | 0.198 |
| Chowdhary, 2016 <sup>53</sup> | Adults               | CBT-Based                 | Individual                 | CAU     | Cut-Off Score | Some Concern | Other Region  | 50  | 0.4562    | 0.300 |
| Choy, 2016 <sup>54</sup>      | Older Adults         | Not-CBT-Based             | Group                      | WL      | Cut-Off Score | Some Concern | East Asia     | 80  | 0.9679    | 0.255 |
| Clark, 2003 <sup>55</sup>     | Perinatal Depression | Not-CBT-Based             | Group                      | WL      | Diagnosis     | Some Concern | North America | 23  | 0.5310    | 0.430 |
| Clark, 2008 <sup>56</sup>     | Perinatal Depression | Not-CBT-Based             | Group                      | WL      | Diagnosis     | Some Concern | North America | 29  | 1.0900    | 0.400 |
| Cohen, 2010 <sup>57</sup>     | Other Target Groups  | Not-CBT-Based             | Other Formats              | WL      | Diagnosis     | Some Concern | North America | 30  | 0.8371    | 0.513 |
| Cooper, 2003 <sup>58</sup>    | Perinatal Depression | CBT-Based & Not-CBT-Based | Individual                 | CAU     | Diagnosis     | Low          | Europe        | 92  | 0.4273    | 0.220 |
| Cramer, 2011 <sup>59</sup>    | Other Target Groups  | CBT-Based                 | Group                      | CAU     | Cut-Off Score | Some Concern | Europe        | 86  | 0.4757    | 0.343 |
| D'elia, 2020 <sup>60</sup>    | Adults               | CBT-Based                 | Group                      | Other   | Diagnosis     | Low          | North America | 16  | 1.4500    | 0.580 |
| Davoudi, 2020 <sup>61</sup>   | General Medical      | CBT-Based                 | Group                      | Other   | Cut-Off Score | Some Concern | Other Region  | 40  | 0.7100    | 0.330 |
| De Groot, 2019 <sup>62</sup>  | General Medical      | CBT-Based                 | Individual                 | CAU     | Diagnosis     | Low          | North America | 51  | 0.7908    | 0.310 |
| De Jong, 2018 <sup>63</sup>   | General Medical      | CBT-Based                 | Group                      | WL      | Diagnosis     | Some Concern | North America | 40  | 0.0600    | 0.330 |
| Dekker, 2012 <sup>64</sup>    | General Medical      | CBT-Based                 | Individual                 | CAU     | Cut-Off Score | Low          | North America | 41  | 0.4200    | 0.320 |
| Dennis, 2020 <sup>65</sup>    | Perinatal Depression | Not-CBT-Based             | Other Formats              | CAU     | Diagnosis     | Some Concern | North America | 222 | 0.8501    | 0.155 |

| Study                              | Target group         | Intervention  | Format           | Control | Diagnosis              | Risk of bias | Region        | N   | Hedges' g | SE    |
|------------------------------------|----------------------|---------------|------------------|---------|------------------------|--------------|---------------|-----|-----------|-------|
| Derubeis, 2005 <sup>66</sup>       | Adults               | CBT-Based     | Individual       | Other   | Diagnosis              | Some Concern | North America | 120 | 0.4500    | 0.220 |
| Desautels, 2017 <sup>67</sup>      | General Medical      | CBT-Based     | Individual       | WL      | Cut-Off Score          | Low          | North America | 45  | 1.0041    | 0.451 |
| Dimidjian, 2006 <sup>68</sup>      | Adults               | CBT-Based     | Individual       | Other   | Diagnosis              | Some Concern | North America | 82  | 0.7350    | 0.338 |
| Dimidjian, 2017 <sup>69</sup>      | Perinatal Depression | CBT-Based     | Other Formats    | CAU     | Cut-Off Score          | Low          | North America | 146 | 0.4235    | 0.187 |
| Dindo, 2012 <sup>70</sup>          | General Medical      | CBT-Based     | Group            | WL      | Diagnosis              | Some Concern | North America | 54  | 1.2392    | 0.432 |
| Dindo, 2019 <sup>71</sup>          | General Medical      | CBT-Based     | Group            | Other   | Diagnosis              | Some Concern | North America | 110 | 0.2958    | 0.240 |
| Dobkin, 2011 <sup>72</sup>         | General Medical      | CBT-Based     | Individual       | CAU     | Diagnosis              | Some Concern | North America | 81  | 1.2008    | 0.283 |
| Dobkin, 2020 <sup>73</sup>         | General Medical      | CBT-Based     | Other Formats    | CAU     | Diagnosis              | Low          | North America | 72  | 1.0499    | 0.255 |
| Dobkin, 2021 <sup>74</sup>         | General Medical      | CBT-Based     | Other Formats    | CAU     | Diagnosis              | Low          | North America | 90  | 0.910     | 0.220 |
| Doering, 2013 <sup>75</sup>        | General Medical      | CBT-Based     | Individual       | CAU     | Diagnosis              | Some Concern | North America | 90  | 1.0268    | 0.280 |
| Dong, 2019 <sup>76</sup>           | General Medical      | Not-CBT-Based | Other Formats    | CAU     | Cut-Off Score          | Low          | East Asia     | 90  | 2.2315    | 0.270 |
| Duarte, 2009 <sup>77</sup>         | General Medical      | CBT-Based     | Group            | CAU     | Diagnosis              | Low          | Other Region  | 85  | 0.8100    | 0.230 |
| Dwight-Johnson, 2011 <sup>78</sup> | Other Target Groups  | CBT-Based     | Other Formats    | CAU     | Cut-Off Score          | Some Concern | North America | 100 | 1.0628    | 0.232 |
| Ebert, 2014 <sup>79</sup>          | Other Target Groups  | CBT-Based     | Guided Self-Help | WL      | Cut-Off Score          | Low          | Europe        | 150 | 0.7580    | 0.190 |
| Ebert, 2018 <sup>80</sup>          | Adults               | Not-CBT-Based | Guided Self-Help | WL      | Subclinical Depression | Low          | Europe        | 189 | 0.4754    | 0.166 |
| Ede, 2020 <sup>81</sup>            | Student Population   | CBT-Based     | Group            | WL      | Cut-Off Score          | Some Concern | Other Region  | 162 | 0.6900    | 0.160 |

| Study                         | Target group         | Intervention              | Format                        | Control | Diagnosis     | Risk of bias        | Region        | N   | Hedges' g | SE    |
|-------------------------------|----------------------|---------------------------|-------------------------------|---------|---------------|---------------------|---------------|-----|-----------|-------|
| Ekers, 2011 <sup>82</sup>     | Adults               | CBT-Based                 | Individual                    | WL      | Diagnosis     | Low                 | Europe        | 44  | 0.8173    | 0.370 |
| Ekkers, 2011 <sup>83</sup>    | Older Adults         | CBT-Based                 | Group                         | CAU     | Diagnosis     | Some Concern        | Europe        | 93  | 0.8177    | 0.252 |
| Elkin, 1989 <sup>84</sup>     | Adults               | CBT-Based & Not-CBT-Based | Individual                    | Other   | Diagnosis     | Low                 | North America | 121 | 0.3242    | 0.196 |
| Embling, 2002 <sup>85</sup>   | Adults               | CBT-Based                 | Group                         | WL      | Diagnosis     | Some Concern        | Europe        | 38  | 2.4700    | 0.430 |
| Eseadi, 2018 <sup>86</sup>    | Other Target Groups  | CBT-Based                 | Group                         | CAU     | Cut-Off Score | Some Concern        | Other Region  | 30  | 9.5600    | 1.320 |
| Euteneuer, 2017 <sup>87</sup> | Adults               | CBT-Based                 | Individual                    | WL      | Diagnosis     | Some Concern        | Europe        | 64  | 0.7400    | 0.260 |
| Evans, 1995 <sup>88</sup>     | General Medical      | CBT-Based & Not-CBT-Based | Group                         | Other   | Cut-Off Score | Some Concern        | North America | 48  | 0.7530    | 0.302 |
| Fann, 2015 <sup>89</sup>      | General Medical      | CBT-Based                 | Individual & Other Formats    | CAU     | Diagnosis     | Some Concern        | North America | 64  | 0.1698    | 0.279 |
| Faramarzi, 2008 <sup>90</sup> | Other Target Groups  | CBT-Based                 | Group                         | CAU     | Cut-Off Score | Some Concern        | Other Region  | 58  | 1.5303    | 0.350 |
| Fledderus, 2012 <sup>91</sup> | Adults               | CBT-Based                 | Guided Self-Help              | WL      | Cut-Off Score | Some Concern        | Europe        | 250 | 0.9098    | 0.185 |
| Floyd, 2004 <sup>92</sup>     | Older Adults         | CBT-Based                 | Guided Self-Help & Individual | WL      | Diagnosis     | Some Concern & High | North America | 24  | 1.0631    | 0.453 |
| Flygare, 2020 <sup>93</sup>   | Adults               | CBT-Based                 | Guided Self-Help              | Other   | Cut-Off Score | Low                 | Europe        | 75  | 0.2300    | 0.230 |
| Folke, 2012 <sup>94</sup>     | Other Target Groups  | CBT-Based                 | Other Formats                 | CAU     | Diagnosis     | Some Concern        | Europe        | 34  | 0.6600    | 0.350 |
| Fonagy, 2015 <sup>95</sup>    | Adults               | Not-CBT-Based             | Individual                    | CAU     | Diagnosis     | Low                 | Europe        | 100 | 0.3906    | 0.240 |
| Forand, 2018 <sup>96</sup>    | Adults               | CBT-Based                 | Guided Self-Help              | WL      | Cut-Off Score | Some Concern        | North America | 103 | 1.3944    | 0.308 |
| Forsell, 2017 <sup>97</sup>   | Perinatal Depression | CBT-Based                 | Guided Self-Help              | CAU     | Diagnosis     | Low                 | Europe        | 40  | 0.9008    | 0.395 |
| Frangou, 2021 <sup>98</sup>   | General Medical      | CBT-Based                 | Individual                    | CAU     | Cut-Off Score | Some Concern        | Europe        | 67  | -0.070    | 0.240 |
| Freedland, 2009 <sup>99</sup> | General Medical      | CBT-Based & Not-CBT-Based | Individual                    | CAU     | Diagnosis     | Low                 | North America | 82  | 0.7013    | 0.245 |



| Study                            | Target group         | Intervention  | Format           | Control | Diagnosis              | Risk of bias        | Region        | N   | Hedges' g | SE    |
|----------------------------------|----------------------|---------------|------------------|---------|------------------------|---------------------|---------------|-----|-----------|-------|
| Freedland, 2015 <sup>100</sup>   | General Medical      | CBT-Based     | Individual       | CAU     | Diagnosis              | Low                 | North America | 158 | 0.6485    | 0.178 |
| Fry, 1983 <sup>101</sup>         | Older Adults         | Not-CBT-Based | Individual       | Other   | Cut-Off Score          | Some Concern        | North America | NA  | 2.2860    | 0.260 |
| Fuhr, 2019 <sup>102</sup>        | Perinatal Depression | CBT-Based     | Individual       | CAU     | Cut-Off Score          | Some Concern        | Other Region  | 243 | 0.2481    | 0.158 |
| Funderburk, 2021 <sup>103</sup>  | Other Target Groups  | CBT-Based     | Individual       | CAU     | Cut-Off Score          | Some Concern        | North America | 140 | 0.220     | 0.170 |
| Furukawa, 2012 <sup>104</sup>    | Other Target Groups  | CBT-Based     | Other Formats    | WL      | Subclinical Depression | Low                 | East Asia     | 118 | 0.6750    | 0.190 |
| Garcia-Pena, 2015 <sup>105</sup> | Older Adults         | CBT-Based     | Group            | CAU     | Cut-Off Score          | Some Concern        | Other Region  | 82  | 0.6000    | 0.260 |
| Gawrysiak, 2009 <sup>106</sup>   | Student Population   | CBT-Based     | Individual       | CAU     | Cut-Off Score          | Some Concern        | North America | 29  | 1.7035    | 0.535 |
| Gellis, 2008 <sup>107</sup>      | General Medical      | CBT-Based     | Individual       | CAU     | Subclinical Depression | Some Concern        | North America | 62  | 1.6984    | 0.315 |
| Gellis, 2010 <sup>108</sup>      | General Medical      | CBT-Based     | Individual       | CAU     | Subclinical Depression | Some Concern        | North America | 36  | 0.8262    | 0.345 |
| Geraedts, 2014 <sup>109</sup>    | Other Target Groups  | CBT-Based     | Guided Self-Help | CAU     | Cut-Off Score          | Low                 | Europe        | 232 | 0.1253    | 0.145 |
| Ghorbani, 2021 <sup>110</sup>    | General Medical      | CBT-Based     | Group            | WL      | Cut-Off Score          | Some Concern        | Other Region  | 40  | 4.500     | 0.600 |
| Gibbons, 2012 <sup>111</sup>     | Adults               | Not-CBT-Based | Individual       | CAU     | Cut-Off Score          | High & Some Concern | North America | 31  | 0.1014    | 0.418 |
| Gitlin, 2013 <sup>112</sup>      | Older Adults         | Not-CBT-Based | Individual       | WL      | Cut-Off Score          | Low                 | North America | 188 | 0.4743    | 0.163 |
| Goodman, 2015 <sup>113</sup>     | Perinatal Depression | Not-CBT-Based | Individual       | CAU     | Cut-Off Score          | Some Concern        | North America | 23  | -0.0139   | 0.660 |
| Greenberg, 2018 <sup>114</sup>   | Adults               | CBT-Based     | Group            | WL      | Cut-Off Score          | Some Concern        | North America | 28  | 1.0800    | 0.410 |
| Grote, 2009 <sup>115</sup>       | Perinatal Depression | Not-CBT-Based | Individual       | CAU     | Cut-Off Score          | Some Concern        | North America | 50  | 1.2672    | 0.395 |

| Study                               | Target group        | Intervention              | Format           | Control | Diagnosis     | Risk of bias | Region        | N   | Hedges' g | SE    |
|-------------------------------------|---------------------|---------------------------|------------------|---------|---------------|--------------|---------------|-----|-----------|-------|
| Hagen, 2017 <sup>116</sup>          | Adults              | CBT-Based                 | Individual       | WL      | Diagnosis     | Some Concern | Europe        | 39  | 2.4700    | 0.430 |
| Hallford, 2016 <sup>117</sup>       | Other Target Groups | Not-CBT-Based             | Individual       | CAU     | Cut-Off Score | Some Concern | Australia     | 27  | 1.1349    | 0.480 |
| Hallgren, 2015 <sup>118</sup>       | Adults              | CBT-Based                 | Guided Self-Help | CAU     | Cut-Off Score | Some Concern | Europe        | 491 | 0.3200    | 0.090 |
| Hamamci, 2006 <sup>119</sup>        | Student Population  | CBT-Based                 | Group            | CAU     | Cut-Off Score | Some Concern | Other Region  | 21  | 1.4050    | 0.490 |
| Hamdan-Mansour, 2009 <sup>120</sup> | Student Population  | CBT-Based                 | Group            | CAU     | Cut-Off Score | Some Concern | Other Region  | 84  | 0.6300    | 0.220 |
| Han, 2020 <sup>121</sup>            | Adults              | CBT-Based & Not-CBT-Based | Group            | Other   | Diagnosis     | Some Concern | East Asia     | 33  | 0.6895    | 0.357 |
| Haringsma, 2006 <sup>122</sup>      | Older Adults        | CBT-Based                 | Group            | WL      | Cut-Off Score | Some Concern | Europe        | 107 | 0.4925    | 0.225 |
| Harley, 2008 <sup>123</sup>         | Adults              | CBT-Based                 | Group            | WL      | Diagnosis     | Some Concern | North America | 19  | 0.8375    | 0.485 |
| Harrer, 2021 <sup>124</sup>         | Student Population  | Not-CBT-Based             | Guided Self-Help | Other   | Cut-Off Score | Low          | Europe        | 200 | 0.360     | 0.140 |
| Hassiotis, 2013 <sup>125</sup>      | Other Target Groups | CBT-Based                 | Individual       | CAU     | Cut-Off Score | Some Concern | Europe        | 30  | 0.0200    | 0.370 |
| Hautzinger, 2004 <sup>126</sup>     | Older Adults        | CBT-Based                 | Group            | WL      | Diagnosis     | Some Concern | Europe        | 112 | 0.9845    | 0.260 |
| Hayman, 1980 <sup>127</sup>         | Adults              | Not-CBT-Based             | Group            | WL      | Cut-Off Score | Some Concern | North America | NA  | 0.4700    | 0.390 |
| He, 2019 <sup>128</sup>             | Adults              | CBT-Based                 | Individual       | Other   | Diagnosis     | Some Concern | East Asia     | 66  | 0.4300    | 0.245 |
| Heckman, 2011 <sup>129</sup>        | General Medical     | Not-CBT-Based             | Group            | CAU     | Cut-Off Score | Some Concern | North America | 200 | 0.3437    | 0.208 |
| Heckman, 2013 <sup>130</sup>        | General Medical     | Not-CBT-Based             | Other Formats    | CAU     | Cut-Off Score | Some Concern | North America | 241 | 0.2300    | 0.130 |
| Heckman, 2017 <sup>131</sup>        | General Medical     | Not-CBT-Based             | Other Formats    | CAU     | Diagnosis     | Some Concern | North America | 140 | 1.1500    | 0.430 |
| Hegerl, 2010 <sup>132</sup>         | Adults              | CBT-Based                 | Group            | Other   | Diagnosis     | Low          | Europe        | 94  | 0.9200    | 0.330 |

| Study                                | Target group         | Intervention  | Format           | Control    | Diagnosis              | Risk of bias | Region        | N   | Hedges' g | SE    |
|--------------------------------------|----------------------|---------------|------------------|------------|------------------------|--------------|---------------|-----|-----------|-------|
| Hemanny, 2019 <sup>133</sup>         | Adults               | CBT-Based     | Individual       | CAU        | Diagnosis              | Some Concern | Other Region  | 51  | 1.2774    | 0.307 |
| Hermanns, 2015 <sup>134</sup>        | General Medical      | CBT-Based     | Group            | CAU        | Subclinical Depression | Some Concern | Europe        | 181 | 0.2000    | 0.150 |
| Herrmann-Lingen, 2016 <sup>135</sup> | General Medical      | Not-CBT-Based | Other Formats    | CAU        | Cut-Off Score          | Some Concern | Europe        | 569 | 0.0068    | 0.087 |
| Hoifodt, 2013 <sup>136</sup>         | Adults               | CBT-Based     | Guided Self-Help | WL         | Cut-Off Score          | Some Concern | Europe        | 105 | 0.3792    | 0.320 |
| Holden, 1989 <sup>137</sup>          | Perinatal Depression | Not-CBT-Based | Individual       | CAU        | Diagnosis              | Some Concern | Europe        | 52  | 0.7200    | 0.330 |
| Honey, 2002 <sup>138</sup>           | Perinatal Depression | CBT-Based     | Group            | CAU        | Cut-Off Score          | Some Concern | Europe        | 46  | 0.2903    | 0.330 |
| Horrell, 2014 <sup>139</sup>         | Adults               | CBT-Based     | Group            | WL         | Cut-Off Score          | Low          | Europe        | 382 | 0.5100    | 0.100 |
| Hou, 2014 <sup>140</sup>             | Perinatal Depression | CBT-Based     | Other Formats    | CAU        | Diagnosis              | Some Concern | East Asia     | 213 | 0.7100    | 0.140 |
| Hsiao, 2014 <sup>141</sup>           | Adults               | Not-CBT-Based | Group            | CAU        | Subclinical Depression | Low          | East Asia     | 74  | -0.5500   | 0.240 |
| Huang, 2016 <sup>142</sup>           | General Medical      | CBT-Based     | Group            | CAU        | Cut-Off Score          | Some Concern | East Asia     | 61  | 1.9500    | 0.310 |
| Hum, 2019 <sup>143</sup>             | General Medical      | CBT-Based     | Other Formats    | Other & WL | Cut-Off Score          | Some Concern | North America | 39  | 0.0688    | 0.330 |
| Hummel, 2017 <sup>144</sup>          | General Medical      | CBT-Based     | Group            | WL         | Cut-Off Score          | Some Concern | Europe        | 129 | 1.3903    | 0.224 |
| Hunter, 2012 <sup>145</sup>          | Other Target Groups  | CBT-Based     | Group            | CAU        | Cut-Off Score          | Some Concern | North America | 84  | 0.4200    | 0.300 |
| Husain, 2017 <sup>146</sup>          | Perinatal Depression | CBT-Based     | Group            | CAU        | Diagnosis              | Some Concern | Other Region  | 219 | 0.8783    | 0.145 |
| Husain, 2021a <sup>147</sup>         | Perinatal Depression | CBT-Based     | Group            | CAU        | Diagnosis              | Some Concern | Other Region  | 769 | 1.455     | 0.080 |
| Husain, 2021b <sup>148</sup>         | Perinatal Depression | CBT-Based     | Group            | CAU        | Diagnosis              | Some Concern | Other Region  | 97  | 2.689     | 0.290 |

| Study                           | Target group         | Intervention              | Format           | Control | Diagnosis              | Risk of bias        | Region        | N   | Hedges' g | SE    |
|---------------------------------|----------------------|---------------------------|------------------|---------|------------------------|---------------------|---------------|-----|-----------|-------|
| Jalali, 2019 <sup>149</sup>     | Other Target Groups  | Not-CBT-Based             | Group            | WL      | Cut-Off Score          | Some Concern        | Other Region  | 42  | 0.9700    | 0.330 |
| Jamison, 1995 <sup>150</sup>    | Adults               | CBT-Based                 | Guided Self-Help | WL      | Diagnosis              | Some Concern & High | North America | 68  | 1.6160    | 0.412 |
| Jarrett, 1999 <sup>151</sup>    | Adults               | CBT-Based                 | Individual       | Other   | Diagnosis              | Some Concern        | North America | 72  | 0.5958    | 0.268 |
| Jelinek, 2016 <sup>152</sup>    | Adults               | CBT-Based                 | Group            | Other   | Diagnosis              | Some Concern        | Europe        | 65  | 0.4832    | 0.283 |
| Jesse, 2015 <sup>153</sup>      | Perinatal Depression | CBT-Based                 | Group            | CAU     | Cut-Off Score          | Some Concern        | North America | 56  | 0.3481    | 0.297 |
| Jiang, 2014 <sup>154</sup>      | Perinatal Depression | Not-CBT-Based             | Other Formats    | CAU     | Cut-Off Score          | Some Concern        | East Asia     | 771 | 1.0500    | 0.080 |
| Johansson, 2012a <sup>155</sup> | Adults               | Not-CBT-Based             | Guided Self-Help | Other   | Diagnosis              | Low                 | Europe        | 92  | 0.8838    | 0.248 |
| Johansson, 2012b <sup>156</sup> | Adults               | CBT-Based                 | Guided Self-Help | Other   | Diagnosis              | Some Concern        | Europe        | 72  | 0.8233    | 0.289 |
| Johansson, 2019 <sup>157</sup>  | Adults               | CBT-Based                 | Guided Self-Help | WL      | Diagnosis              | Low                 | Europe        | 54  | 1.5650    | 0.310 |
| Johnson, 2012 <sup>158</sup>    | Other Target Groups  | Not-CBT-Based             | Other Formats    | Other   | Diagnosis              | Some Concern        | North America | 38  | 0.7521    | 0.410 |
| Johnson, 2019 <sup>159</sup>    | Other Target Groups  | Not-CBT-Based             | Other Formats    | CAU     | Diagnosis              | Low                 | North America | NA  | 0.1950    | 0.150 |
| Joling, 2011 <sup>160</sup>     | Older Adults         | CBT-Based                 | Guided Self-Help | CAU     | Subclinical Depression | Low                 | Europe        | 171 | -0.0794   | 0.207 |
| Jordans, 2019 <sup>161</sup>    | Adults               | CBT-Based                 | Individual       | CAU     | Diagnosis              | Low                 | Other Region  | 120 | 0.4341    | 0.200 |
| Kamga, 2017 <sup>162</sup>      | General Medical      | CBT-Based                 | Guided Self-Help | WL      | Cut-Off Score          | Low                 | North America | 70  | 0.4300    | 0.240 |
| Kanter, 2015 <sup>163</sup>     | Other Target Groups  | CBT-Based                 | Individual       | CAU     | Diagnosis              | Some Concern        | North America | 40  | 0.2890    | 0.360 |
| Keeley, 2016 <sup>164</sup>     | Adults               | Not-CBT-Based             | Individual       | CAU     | Diagnosis              | Low                 | North America | 172 | 0.4702    | 0.215 |
| Kelly, 1993 <sup>165</sup>      | General Medical      | CBT-Based & Not-CBT-Based | Group            | Other   | Cut-Off Score          | Some Concern        | North America | 48  | 0.6960    | 0.315 |

| Study                            | Target group         | Intervention              | Format                           | Control | Diagnosis     | Risk of bias | Region        | N   | Hedges' g | SE    |
|----------------------------------|----------------------|---------------------------|----------------------------------|---------|---------------|--------------|---------------|-----|-----------|-------|
| Kenter, 2016 <sup>166</sup>      | Adults               | CBT-Based                 | Guided Self-Help                 | WL      | Diagnosis     | Low          | Europe        | 269 | -0.0700   | 0.120 |
| Kessler, 2009 <sup>167</sup>     | Adults               | CBT-Based                 | Guided Self-Help                 | WL      | Diagnosis     | Low          | Europe        | 218 | 0.5130    | 0.155 |
| Kim, 2018 <sup>168</sup>         | General Medical      | CBT-Based                 | Other Formats                    | CAU     | Cut-Off Score | Some Concern | East Asia     | 60  | 0.8200    | 0.270 |
| King, 2000 <sup>169</sup>        | Adults               | CBT-Based & Not-CBT-Based | Individual                       | CAU     | Cut-Off Score | Some Concern | Europe        | 132 | 0.4150    | 0.180 |
| Kivi, 2014 <sup>170</sup>        | Adults               | CBT-Based                 | Guided Self-Help                 | CAU     | Diagnosis     | Some Concern | Europe        | 86  | -0.1600   | 0.260 |
| Kleiboer, 2015 <sup>171</sup>    | Adults               | CBT-Based & Not-CBT-Based | Other Formats & Guided Self-Help | WL      | Cut-Off Score | Low          | Europe        | 214 | 0.2313    | 0.140 |
| Korrelboom, 2012 <sup>172</sup>  | Adults               | Not-CBT-Based             | Group                            | WL      | Diagnosis     | Low          | Europe        | 62  | 0.7884    | 0.313 |
| Korte, 2012 <sup>173</sup>       | Older Adults         | Not-CBT-Based             | Group                            | WL      | Cut-Off Score | Low          | Europe        | 169 | 0.5878    | 0.180 |
| Kramer, 2021 <sup>174</sup>      | Adults               | CBT-Based                 | Guided Self-Help                 | WL      | Cut-Off Score | Some Concern | Europe        | 136 | 0.520     | 0.170 |
| Laidlaw, 2008 <sup>175</sup>     | Older Adults         | CBT-Based                 | Individual                       | CAU     | Diagnosis     | Some Concern | Europe        | 40  | 0.4692    | 0.333 |
| Lamers, 2010 <sup>176</sup>      | General Medical      | CBT-Based                 | Individual                       | CAU     | Diagnosis     | Low          | Europe        | 229 | 0.2503    | 0.180 |
| Lamers, 2015 <sup>177</sup>      | Adults               | Not-CBT-Based             | Guided Self-Help                 | WL      | Cut-Off Score | Low          | Europe        | 116 | 0.3400    | 0.190 |
| Landreville, 1997 <sup>178</sup> | Older Adults         | CBT-Based                 | Guided Self-Help                 | WL      | Cut-Off Score | Some Concern | North America | 22  | 0.3243    | 0.513 |
| Lappalainen, 2015 <sup>179</sup> | Adults               | CBT-Based                 | Guided Self-Help                 | WL      | Diagnosis     | Some Concern | Europe        | 37  | 0.6635    | 0.467 |
| Larcombe, 1984 <sup>180</sup>    | General Medical      | CBT-Based                 | Group                            | WL      | Diagnosis     | Some Concern | Australia     | 19  | 2.6939    | 0.650 |
| Lee, 2021 <sup>181</sup>         | Adults               | CBT-Based                 | Group                            | CAU     | Diagnosis     | Low          | East Asia     | 50  | 0.632     | 0.380 |
| Lemma, 2013 <sup>182</sup>       | Adults               | Not-CBT-Based             | Other Formats                    | Other   | Cut-Off Score | Some Concern | Europe        | 16  | -0.1950   | 0.500 |
| Lenze, 2017 <sup>183</sup>       | Perinatal Depression | Not-CBT-Based             | Individual                       | CAU     | Diagnosis     | Low          | North America | 40  | -0.2904   | 0.340 |
| Lenze, 2020 <sup>184</sup>       | Perinatal Depression | Not-CBT-Based             | Individual                       | CAU     | Diagnosis     | Low          | North America | 30  | -0.1400   | 0.370 |

| Study                               | Target group         | Intervention  | Format           | Control | Diagnosis              | Risk of bias | Region        | N   | Hedges' g | SE    |
|-------------------------------------|----------------------|---------------|------------------|---------|------------------------|--------------|---------------|-----|-----------|-------|
| Lerner, 2015 <sup>185</sup>         | Other Target Groups  | CBT-Based     | Other Formats    | CAU     | Diagnosis              | Some Concern | North America | 276 | 0.5253    | 0.160 |
| Leung, 2013 <sup>186</sup>          | Perinatal Depression | CBT-Based     | Group            | CAU     | Cut-Off Score          | Some Concern | East Asia     | 97  | 0.3053    | 0.205 |
| Leung, 2016 <sup>187</sup>          | Perinatal Depression | CBT-Based     | Group            | Other   | Cut-Off Score          | Some Concern | East Asia     | 164 | 0.1550    | 0.160 |
| Lexis, 2011 <sup>188</sup>          | Other Target Groups  | CBT-Based     | Individual       | CAU     | Cut-Off Score          | Some Concern | Europe        | 113 | 0.3161    | 0.213 |
| Liang, 2021 <sup>189</sup>          | Student Population   | Not-CBT-Based | Group            | Other   | Cut-Off Score          | Some Concern | East Asia     | 52  | 0.550     | 0.285 |
| Linde, 2011 <sup>190</sup>          | Other Target Groups  | CBT-Based     | Group            | Other   | Cut-Off Score          | Low          | North America | NA  | 0.1500    | 0.140 |
| Liu, 2009 <sup>191</sup>            | Adults               | CBT-Based     | Guided Self-Help | WL      | Cut-Off Score          | Some Concern | East Asia     | 51  | 0.2440    | 0.305 |
| Liu, 2021 <sup>192</sup>            | Perinatal Depression | CBT-Based     | Individual       | CAU     | Subclinical Depression | Some Concern | East Asia     | 228 | 1.490     | 0.150 |
| Lloyd-Williams, 2018 <sup>193</sup> | General Medical      | Not-CBT-Based | Individual       | CAU     | Cut-Off Score          | Some Concern | Europe        | 37  | 0.2818    | 0.380 |
| Lök, 2019 <sup>194</sup>            | General Medical      | Not-CBT-Based | Group            | CAU     | Cut-Off Score          | Some Concern | Other Region  | 60  | 1.7600    | 0.310 |
| Losada, 2015 <sup>195</sup>         | Other Target Groups  | CBT-Based     | Individual       | Other   | Cut-Off Score          | Some Concern | Europe        | 77  | 0.7715    | 0.258 |
| Lovell, 2008 <sup>196</sup>         | Adults               | CBT-Based     | Individual       | CAU     | Cut-Off Score          | Some Concern | Europe        | 41  | 0.1829    | 0.315 |
| Lund, 2019 <sup>197</sup>           | Perinatal Depression | Not-CBT-Based | Individual       | CAU     | Cut-Off Score          | Low          | Other Region  | 277 | 0.1183    | 0.127 |
| Lundgren, 2016 <sup>198</sup>       | General Medical      | CBT-Based     | Guided Self-Help | Other   | Cut-Off Score          | Low          | Europe        | 50  | 0.2700    | 0.280 |
| Lustman, 1998 <sup>199</sup>        | General Medical      | CBT-Based     | Individual       | CAU     | Diagnosis              | Low          | North America | 44  | 1.0944    | 0.378 |
| Lynch, 1997 <sup>200</sup>          | Adults               | CBT-Based     | Other Formats    | CAU     | Subclinical Depression | Some Concern | North America | 24  | 0.9300    | 0.430 |

| Study                           | Target group         | Intervention              | Format                | Control     | Diagnosis     | Risk of bias | Region        | N   | Hedges' g | SE    |
|---------------------------------|----------------------|---------------------------|-----------------------|-------------|---------------|--------------|---------------|-----|-----------|-------|
| Lynch, 2004 <sup>201</sup>      | Adults               | CBT-Based                 | Other Formats         | CAU & Other | Cut-Off Score | Some Concern | North America | 20  | 0.0413    | 0.453 |
| Lynch, 2019 <sup>202</sup>      | Adults               | Not-CBT-Based             | Other Formats         | CAU         | Diagnosis     | Low          | Europe        | 254 | 0.5786    | 0.188 |
| Maclean, 2020 <sup>203</sup>    | Adults               | Not-CBT-Based             | Guided Self-Help      | Other       | Cut-Off Score | Some Concern | North America | 93  | 0.1700    | 0.210 |
| Macpherson, 2013 <sup>204</sup> | Adults               | Not-CBT-Based             | Individual            | CAU         | Cut-Off Score | Low          | Europe        | 364 | 0.2300    | 0.110 |
| Mahmoodi, 2021 <sup>205</sup>   | Adults               | CBT-Based                 | Individual            | WL          | Cut-Off Score | Some Concern | Other Region  | 42  | 1.232     | 0.345 |
| Maina, 2005 <sup>206</sup>      | Adults               | Not-CBT-Based             | Individual            | WL          | Diagnosis     | Some Concern | Europe        | 20  | 1.1194    | 0.485 |
| Malouff, 1988 <sup>207</sup>    | Other Target Groups  | CBT-Based                 | Group                 | WL          | Cut-Off Score | Some Concern | North America | 28  | 1.2855    | 0.417 |
| Martin, 2015 <sup>208</sup>     | General Medical      | CBT-Based                 | Individual            | WL          | Diagnosis     | Some Concern | Australia     | 40  | 1.2395    | 0.390 |
| Matsuzaka, 2017 <sup>209</sup>  | Adults               | Not-CBT-Based             | Individual            | CAU         | Diagnosis     | Low          | Other Region  | 78  | 0.0758    | 0.264 |
| Mcclay, 2015 <sup>210</sup>     | Adults               | CBT-Based                 | Other Formats         | WL          | Cut-Off Score | Some Concern | Europe        | NA  | 0.8500    | 0.450 |
| Mccusker, 2021 <sup>211</sup>   | General Medical      | CBT-Based                 | Guided Self-Help      | CAU         | Cut-Off Score | Some Concern | North America | 244 | 0.688     | 0.170 |
| Mcindoo, 2016 <sup>212</sup>    | Student Population   | CBT-Based                 | Individual            | WL          | Cut-Off Score | Some Concern | North America | 35  | 0.9383    | 0.431 |
| Mckee, 2006 <sup>213</sup>      | Perinatal Depression | CBT-Based                 | Individual            | CAU         | Cut-Off Score | Some Concern | North America | 41  | 0.0700    | 0.310 |
| Mennen, 2021 <sup>214</sup>     | Perinatal Depression | Not-CBT-Based             | Group                 | CAU         | Cut-Off Score | Some Concern | North America | 119 | 0.390     | 0.190 |
| Michalak, 2015 <sup>215</sup>   | Adults               | Not-CBT-Based & CBT-Based | Other Formats & Group | CAU         | Diagnosis     | Low          | Europe        | 63  | 0.5742    | 0.332 |
| Milgrom, 2005 <sup>216</sup>    | Perinatal Depression | CBT-Based & Not-CBT-Based | Group & Individual    | CAU         | Diagnosis     | Low          | Australia     | 69  | 0.7194    | 0.347 |
| Milgrom, 2011 <sup>217</sup>    | Perinatal Depression | CBT-Based                 | Individual            | CAU         | Cut-Off Score | Low          | Australia     | 46  | 0.3407    | 0.300 |

| Study                              | Target group         | Intervention  | Format                           | Control          | Diagnosis              | Risk of bias | Region        | N   | Hedges' g | SE    |
|------------------------------------|----------------------|---------------|----------------------------------|------------------|------------------------|--------------|---------------|-----|-----------|-------|
| Milgrom, 2015 <sup>218</sup>       | Perinatal Depression | CBT-Based     | Individual                       | CAU              | Diagnosis              | Low          | Australia     | 44  | 0.5700    | 0.310 |
| Milgrom, 2016 <sup>219</sup>       | Perinatal Depression | CBT-Based     | Guided Self-Help                 | CAU              | Diagnosis              | Low          | Australia     | 40  | 1.0795    | 0.375 |
| Milgrom, 2020 <sup>220</sup>       | Perinatal Depression | CBT-Based     | Guided Self-Help                 | CAU              | Diagnosis              | Low          | Australia     | 42  | 1.0173    | 0.360 |
| Milgrom, 2021 <sup>221</sup>       | Perinatal Depression | CBT-Based     | Guided Self-Help & Individual    | CAU              | Diagnosis              | Low          | Australia     | 77  | 0.244     | 0.235 |
| Miller, 2002 <sup>222</sup>        | Adults               | Not-CBT-Based | Other Formats                    | CAU              | Cut-Off Score          | Some Concern | North America | 30  | 0.4500    | 0.370 |
| Miranda, 2003 <sup>223</sup>       | Other Target Groups  | CBT-Based     | Other Formats                    | CAU              | Diagnosis              | Low          | North America | 179 | 0.1600    | 0.150 |
| Mohr, 2000 <sup>224</sup>          | General Medical      | CBT-Based     | Other Formats                    | CAU              | Cut-Off Score          | Some Concern | North America | 32  | 0.5700    | 0.360 |
| Mohr, 2011 <sup>225</sup>          | Other Target Groups  | CBT-Based     | Other Formats                    | CAU              | Diagnosis              | Some Concern | North America | 80  | 0.2361    | 0.233 |
| Mohr, 2013 <sup>226</sup>          | Adults               | CBT-Based     | Guided Self-Help & Other Formats | WL               | Diagnosis              | Low          | North America | 62  | 0.4968    | 0.272 |
| Moldovan, 2013 <sup>227</sup>      | Student Population   | CBT-Based     | Guided Self-Help                 | CAU & Other & WL | Cut-Off Score          | Low          | Europe        | 42  | 0.5433    | 0.347 |
| Montero-Marín, 2016 <sup>228</sup> | Adults               | CBT-Based     | Other Formats & Guided Self-Help | CAU              | Diagnosis              | Low          | Europe        | 128 | 0.0989    | 0.175 |
| Moon, 2021 <sup>229</sup>          | General Medical      | CBT-Based     | Group                            | CAU              | Cut-Off Score          | Low          | East Asia     | 39  | 1.881     | 0.390 |
| Mossey, 1996 <sup>230</sup>        | Older Adults         | Not-CBT-Based | Individual                       | CAU              | Subclinical Depression | Some Concern | North America | 62  | 0.2100    | 0.280 |
| Mukhtar, 2011 <sup>231</sup>       | Adults               | CBT-Based     | Group                            | WL               | Diagnosis              | Some Concern | East Asia     | 113 | 4.8300    | 0.370 |
| Mulcahy, 2010 <sup>232</sup>       | Perinatal Depression | Not-CBT-Based | Other Formats                    | CAU              | Diagnosis              | Some Concern | Australia     | 48  | 0.6209    | 0.373 |
| Musa, 2021 <sup>233</sup>          | Other Target Groups  | CBT-Based     | Group                            | CAU              | Diagnosis              | Low          | Other Region  | 100 | 0.490     | 0.200 |



| Study                                | Target group         | Intervention  | Format                     | Control  | Diagnosis              | Risk of bias       | Region        | N    | Hedges' g | SE    |
|--------------------------------------|----------------------|---------------|----------------------------|----------|------------------------|--------------------|---------------|------|-----------|-------|
| Mynors-Wallis, 1995 <sup>234</sup>   | Adults               | CBT-Based     | Individual                 | Other    | Diagnosis              | Some Concern       | Europe        | 58   | 0.6807    | 0.292 |
| Naeem, 2013 <sup>235</sup>           | Adults               | CBT-Based     | Guided Self-Help           | CAU      | Diagnosis              | Low                | Other Region  | 186  | 1.1863    | 0.180 |
| Naeem, 2015 <sup>236</sup>           | Adults               | CBT-Based     | Other Formats              | CAU      | Diagnosis              | Low                | Other Region  | 137  | 0.8600    | 0.180 |
| Nakagawa, 2017 <sup>237</sup>        | Adults               | CBT-Based     | Individual                 | CAU      | Diagnosis              | Low                | East Asia     | 80   | 0.5165    | 0.246 |
| Nakimuli-Mpungu, 2015 <sup>238</sup> | General Medical      | Not-CBT-Based | Group                      | Other    | Diagnosis              | Low                | Other Region  | 109  | 0.0500    | 0.190 |
| Nakimuli-Mpungu, 2020 <sup>239</sup> | General Medical      | CBT-Based     | Group                      | Other    | Diagnosis              | Low                | Other Region  | 1156 | 2.6100    | 0.390 |
| Nasrin, 2017 <sup>240</sup>          | Adults               | CBT-Based     | Individual                 | WL       | Diagnosis              | Some Concern       | Europe        | 36   | 1.7400    | 0.390 |
| Neugebauer, 2006 <sup>241</sup>      | Other Target Groups  | Not-CBT-Based | Other Formats              | CAU      | Subclinical Depression | Some Concern       | North America | 19   | 0.1500    | 0.460 |
| Newby, 2014 <sup>242</sup>           | Adults               | CBT-Based     | Other Formats & Individual | CAU      | Cut-Off Score          | Some Concern       | Australia     | 40   | 0.2750    | 0.320 |
| Newby, 2017 <sup>243</sup>           | General Medical      | CBT-Based     | Guided Self-Help           | WL       | Diagnosis              | Low                | Australia     | 72   | 0.9841    | 0.260 |
| Nezu, 1986 <sup>244</sup>            | Adults               | CBT-Based     | Group                      | WL       | Diagnosis              | Some Concern       | North America | 17   | 1.3862    | 0.714 |
| Nezu, 1989 <sup>245</sup>            | Adults               | CBT-Based     | Group                      | WL       | Diagnosis              | Some Concern       | North America | 26   | 1.8821    | 0.600 |
| Ng, 2013 <sup>246</sup>              | Older Adults         | Not-CBT-Based | Individual                 | CAU      | Cut-Off Score          | Some Concern       | East Asia     | 26   | 1.4300    | 0.440 |
| Ngai, 2015 <sup>247</sup>            | Perinatal Depression | CBT-Based     | Other Formats              | CAU      | Cut-Off Score          | Low                | East Asia     | 397  | 0.4509    | 0.107 |
| Niedermoser, 2020 <sup>248</sup>     | Other Target Groups  | Not-CBT-Based | Group                      | CAU      | Diagnosis              | Low & Some Concern | Europe        | 27   | 0.5300    | 0.390 |
| Nobis, 2015 <sup>249</sup>           | General Medical      | Not-CBT-Based | Guided Self-Help           | Other    | Cut-Off Score          | Some Concern       | Europe        | 257  | 0.9708    | 0.155 |
| Nollett, 2016 <sup>250</sup>         | General Medical      | CBT-Based     | Individual                 | CAU & WL | Cut-Off Score          | Some Concern       | Europe        | 44   | -0.1233   | 0.325 |

| Study                          | Target group         | Intervention              | Format           | Control | Diagnosis     | Risk of bias | Region        | N   | Hedges' g | SE    |
|--------------------------------|----------------------|---------------------------|------------------|---------|---------------|--------------|---------------|-----|-----------|-------|
| Northwood, 2020 <sup>251</sup> | Other Target Groups  | Not-CBT-Based             | Individual       | CAU     | Diagnosis     | Low          | North America | 214 | 0.9200    | 0.140 |
| Nyström, 2017 <sup>252</sup>   | Adults               | CBT-Based                 | Guided Self-Help | WL      | Diagnosis     | Low          | Europe        | 109 | 0.8100    | 0.200 |
| O'Hara, 2000 <sup>253</sup>    | Perinatal Depression | Not-CBT-Based             | Individual       | WL      | Diagnosis     | Some Concern | North America | 102 | 0.9657    | 0.257 |
| O'Mahen, 2013 <sup>254</sup>   | Perinatal Depression | CBT-Based                 | Individual       | CAU     | Diagnosis     | Low          | Europe        | 58  | 2.2879    | 0.567 |
| O'Neil, 2014 <sup>255</sup>    | General Medical      | CBT-Based                 | Other Formats    | CAU     | Cut-Off Score | Low          | Australia     | 121 | 0.1150    | 0.180 |
| Oehler, 2020 <sup>256</sup>    | Adults               | CBT-Based                 | Guided Self-Help | Other   | Diagnosis     | Some Concern | Europe        | 263 | 0.1800    | 0.120 |
| Olukolade, 2017 <sup>257</sup> | General Medical      | CBT-Based & Not-CBT-Based | Individual       | WL      | Cut-Off Score | Some Concern | Other Region  | 20  | 0.6981    | 0.500 |
| Omidi, 2013 <sup>258</sup>     | Adults               | CBT-Based                 | Group            | CAU     | Diagnosis     | Some Concern | Other Region  | 60  | 1.5783    | 0.295 |
| Onuigbo, 2019 <sup>259</sup>   | General Medical      | CBT-Based                 | Group            | CAU     | Cut-Off Score | Low          | Other Region  | 65  | 1.7400    | 0.290 |
| Onyechi, 2016 <sup>260</sup>   | General Medical      | CBT-Based                 | Individual       | Other   | Cut-Off Score | Some Concern | Other Region  | 80  | 10.3177   | 1.005 |
| Pace, 1993 <sup>261</sup>      | Student Population   | CBT-Based                 | Individual       | WL      | Cut-Off Score | Some Concern | North America | 68  | 0.8335    | 0.265 |
| Pagoto, 2013 <sup>262</sup>    | Other Target Groups  | CBT-Based                 | Other Formats    | Other   | Diagnosis     | Low          | North America | 136 | 0.4300    | 0.190 |
| Patel, 2017 <sup>263</sup>     | Adults               | CBT-Based                 | Individual       | CAU     | Cut-Off Score | Low          | Other Region  | 463 | 0.5400    | 0.100 |
| Pecheur, 1984 <sup>264</sup>   | Student Population   | CBT-Based                 | Individual       | WL      | Diagnosis     | Some Concern | North America | 14  | 1.9141    | 0.662 |
| Peden, 2000 <sup>265</sup>     | Student Population   | CBT-Based                 | Group            | CAU     | Cut-Off Score | Some Concern | North America | 74  | 1.1300    | 0.320 |
| Penckofer, 2012 <sup>266</sup> | General Medical      | CBT-Based                 | Group            | CAU     | Cut-Off Score | Some Concern | North America | 70  | 0.6501    | 0.265 |
| Perini, 2009 <sup>267</sup>    | Adults               | CBT-Based                 | Guided Self-Help | WL      | Diagnosis     | Some Concern | Australia     | 47  | 0.6168    | 0.390 |

| Study                                  | Target group         | Intervention              | Format           | Control  | Diagnosis              | Risk of bias | Region        | N   | Hedges' g | SE    |
|----------------------------------------|----------------------|---------------------------|------------------|----------|------------------------|--------------|---------------|-----|-----------|-------|
| Petersen, 2014 <sup>268</sup>          | General Medical      | Not-CBT-Based             | Group            | CAU      | Diagnosis              | Some Concern | Other Region  | 34  | 0.9200    | 0.360 |
| Pibernik-Okanovic, 2009 <sup>269</sup> | General Medical      | CBT-Based                 | Group            | CAU      | Cut-Off Score          | Some Concern | Europe        | NA  | -0.1400   | 0.080 |
| Pibernik-Okanovic, 2015 <sup>270</sup> | General Medical      | CBT-Based                 | Group            | CAU      | Subclinical Depression | Low          | Europe        | 121 | 0.0800    | 0.180 |
| Pihlaja, 2020 <sup>271</sup>           | Adults               | CBT-Based                 | Guided Self-Help | CAU      | Diagnosis              | Some Concern | Europe        | 100 | 0.4700    | 0.200 |
| Poleshuck, 2014 <sup>272</sup>         | General Medical      | Not-CBT-Based             | Individual       | CAU      | Diagnosis              | Some Concern | North America | 50  | 0.1700    | 0.280 |
| Pot, 2010 <sup>273</sup>               | Older Adults         | Not-CBT-Based             | Group            | Other    | Subclinical Depression | Some Concern | Europe        | 171 | 0.3900    | 0.150 |
| Pots, 2014 <sup>274</sup>              | Adults               | CBT-Based                 | Group            | WL       | Cut-Off Score          | Low          | Europe        | 146 | 0.5324    | 0.200 |
| Pots, 2016 <sup>275</sup>              | Adults               | CBT-Based                 | Guided Self-Help | WL       | Cut-Off Score          | Low          | Europe        | 166 | 0.5953    | 0.170 |
| Power-Michael, 2012 <sup>276</sup>     | Adults               | CBT-Based & Not-CBT-Based | Individual       | WL       | Diagnosis              | Some Concern | Europe        | 40  | 0.5181    | 0.370 |
| Prendergast, 2001 <sup>277</sup>       | Perinatal Depression | CBT-Based                 | Individual       | Other    | Diagnosis              | Some Concern | Australia     | 36  | 0.1208    | 0.373 |
| Preschl, 2012 <sup>278</sup>           | Older Adults         | Not-CBT-Based             | Individual       | WL       | Cut-Off Score          | Some Concern | Europe        | 36  | 0.7100    | 0.350 |
| Propst, 1992 <sup>279</sup>            | Other Target Groups  | CBT-Based                 | Individual       | CAU & WL | Cut-Off Score          | Some Concern | North America | 24  | 0.5267    | 0.472 |
| Psarraki, 2021 <sup>280</sup>          | Adults               | Not-CBT-Based             | Other Formats    | CAU      | Diagnosis              | Some Concern | Europe        | 62  | 0.535     | 0.260 |
| Puckering, 2010 <sup>281</sup>         | Perinatal Depression | Not-CBT-Based             | Group            | WL       | Cut-Off Score          | Some Concern | Europe        | 14  | 0.8200    | 0.610 |
| Pugh, 2016 <sup>282</sup>              | Perinatal Depression | CBT-Based                 | Guided Self-Help | WL       | Cut-Off Score          | Some Concern | North America | 41  | 0.8192    | 0.337 |
| Qiu, 2013 <sup>283</sup>               | General Medical      | CBT-Based                 | Group            | WL       | Diagnosis              | Low          | East Asia     | 62  | 2.1700    | 0.320 |
| Raevuori, 2021 <sup>284</sup>          | Student Population   | Not-CBT-Based             | Guided Self-Help | CAU      | Diagnosis              | Low          | Europe        | 124 | -0.260    | 0.180 |

| Study                          | Target group         | Intervention              | Format                | Control | Diagnosis              | Risk of bias | Region        | N   | Hedges' g | SE    |
|--------------------------------|----------------------|---------------------------|-----------------------|---------|------------------------|--------------|---------------|-----|-----------|-------|
| Rahman, 2008 <sup>285</sup>    | Perinatal Depression | CBT-Based                 | Group                 | Other   | Diagnosis              | Low          | Other Region  | 811 | 0.7287    | 0.075 |
| Ransom, 2008 <sup>286</sup>    | General Medical      | Not-CBT-Based             | Other Formats         | CAU     | Diagnosis              | Some Concern | North America | 71  | 0.3669    | 0.415 |
| Raue, 2019 <sup>287</sup>      | Older Adults         | CBT-Based                 | Individual            | CAU     | Cut-Off Score          | High         | North America | 14  | 0.7900    | 0.560 |
| Raya-Tena, 2021 <sup>288</sup> | General Medical      | Not-CBT-Based             | Group                 | CAU     | Cut-Off Score          | Some Concern | Europe        | 394 | 0.142     | 0.115 |
| Rehm, 1981 <sup>289</sup>      | Adults               | Not-CBT-Based             | Group                 | WL      | Cut-Off Score          | Some Concern | North America | 23  | 0.4814    | 0.452 |
| Reins, 2019 <sup>290</sup>     | Adults               | Not-CBT-Based             | Guided Self-Help      | Other   | Diagnosis              | Low          | Europe        | 130 | 0.2750    | 0.217 |
| Richards, 2015 <sup>291</sup>  | Adults               | CBT-Based                 | Guided Self-Help      | WL      | Cut-Off Score          | Some Concern | Europe        | 191 | 0.7691    | 0.250 |
| Richards, 2018 <sup>292</sup>  | General Medical      | CBT-Based                 | Individual            | CAU     | Cut-Off Score          | Low          | Europe        | 22  | -0.4185   | 0.520 |
| Rief, 2018 <sup>293</sup>      | Adults               | Not-CBT-Based & CBT-Based | Individual            | WL      | Diagnosis              | Low          | Europe        | 86  | 0.8734    | 0.403 |
| Ritvo, 2021 <sup>294</sup>     | Adults               | CBT-Based                 | Guided Self-Help      | CAU     | Diagnosis              | Low          | North America | 45  | 0.561     | 0.305 |
| Rizvi, 2015 <sup>295</sup>     | Adults               | CBT-Based                 | Individual            | WL      | Diagnosis              | Some Concern | North America | 36  | 0.1419    | 0.370 |
| Rohan, 2007 <sup>296</sup>     | Adults               | CBT-Based                 | Group & Other Formats | WL      | Diagnosis              | Some Concern | North America | 30  | 1.2087    | 0.469 |
| Rohde, 2016 <sup>297</sup>     | Student Population   | CBT-Based                 | Group                 | Other   | Subclinical Depression | Some Concern | North America | 59  | 0.7050    | 0.270 |
| Rohricht, 2013 <sup>298</sup>  | Adults               | Not-CBT-Based             | Group                 | WL      | Diagnosis              | Low          | Europe        | 23  | 0.9200    | 0.440 |
| Ross, 1985 <sup>299</sup>      | Adults               | CBT-Based                 | Other Formats         | WL      | Diagnosis              | Some Concern | Europe        | 41  | 1.4750    | 0.350 |
| Rosso, 2017 <sup>300</sup>     | Adults               | CBT-Based                 | Guided Self-Help      | Other   | Diagnosis              | Some Concern | North America | 76  | 0.9269    | 0.268 |
| Rude, 1986 <sup>301</sup>      | Adults               | Not-CBT-Based             | Group                 | WL      | Cut-Off Score          | Some Concern | North America | NA  | 1.0300    | 0.330 |

| Study                                   | Target group        | Intervention              | Format                                | Control | Diagnosis              | Risk of bias | Region        | N   | Hedges' g | SE    |
|-----------------------------------------|---------------------|---------------------------|---------------------------------------|---------|------------------------|--------------|---------------|-----|-----------|-------|
| Russell, 2019 <sup>302</sup>            | Other Target Groups | CBT-Based                 | Guided Self-Help                      | CAU     | Cut-Off Score          | Some Concern | Europe        | 51  | 0.3171    | 0.290 |
| Ruwaard, 2009 <sup>303</sup>            | Adults              | CBT-Based                 | Guided Self-Help                      | WL      | Cut-Off Score          | Some Concern | Europe        | 61  | 0.7113    | 0.366 |
| Ruzickova, 2021 <sup>304</sup>          | Adults              | CBT-Based                 | Other Formats                         | CAU     | Cut-Off Score          | Some Concern | Europe        | 68  | 0.640     | 0.250 |
| Safren, 2009 <sup>305</sup>             | General Medical     | CBT-Based                 | Individual                            | WL      | Diagnosis              | Some Concern | North America | 45  | 0.6425    | 0.305 |
| Safren, 2014 <sup>306</sup>             | General Medical     | CBT-Based                 | Individual                            | CAU     | Diagnosis              | Some Concern | North America | 87  | 0.6500    | 0.220 |
| Safren, 2016 <sup>307</sup>             | General Medical     | CBT-Based & Not-CBT-Based | Individual                            | CAU     | Diagnosis              | Some Concern | North America | 144 | 0.3850    | 0.180 |
| Safren, 2021 <sup>308</sup>             | General Medical     | CBT-Based                 | Individual                            | CAU     | Diagnosis              | Some Concern | Other Region  | 161 | 0.640     | 0.160 |
| Salamanca-Sanabria, 2020 <sup>309</sup> | Student Population  | CBT-Based                 | Guided Self-Help                      | WL      | Cut-Off Score          | Some Concern | Other Region  | 58  | 0.9642    | 0.300 |
| Saloheimo, 2016 <sup>310</sup>          | Adults              | Not-CBT-Based & CBT-Based | Individual & Group                    | CAU     | Diagnosis              | Some Concern | Europe        | 88  | 0.2202    | 0.235 |
| Sander, 2020 <sup>311</sup>             | General Medical     | CBT-Based                 | Guided Self-Help                      | CAU     | Subclinical Depression | Low          | Europe        | 297 | 0.2819    | 0.193 |
| Savard, 2006 <sup>312</sup>             | General Medical     | CBT-Based                 | Individual                            | WL      | Cut-Off Score          | Some Concern | North America | 37  | 0.6449    | 0.343 |
| Savari, 2021 <sup>313</sup>             | Student Population  | CBT-Based                 | Group                                 | WL      | Diagnosis              | Some Concern | Other Region  | 30  | 1.650     | 0.430 |
| Schlicker, 2020 <sup>314</sup>          | General Medical     | CBT-Based                 | Guided Self-Help                      | WL      | Diagnosis              | Low          | Europe        | 77  | 0.3424    | 0.243 |
| Schmidt, 1983 <sup>315</sup>            | Adults              | CBT-Based                 | Guided Self-Help & Individual & Group | WL      | Cut-Off Score          | Some Concern | North America | 22  | 1.1474    | 0.475 |
| Schramm, 2020 <sup>316</sup>            | Other Target Groups | Not-CBT-Based             | Group                                 | CAU     | Diagnosis              | Some Concern | Europe        | 27  | 0.2756    | 0.427 |
| Schulberg, 1996 <sup>317</sup>          | Adults              | Not-CBT-Based             | Individual                            | CAU     | Diagnosis              | Some Concern | North America | 184 | 0.5744    | 0.170 |
| Schuster, 2017 <sup>318</sup>           | Adults              | Not-CBT-Based             | Group                                 | WL      | Cut-Off Score          | Some Concern | Europe        | 45  | 0.8980    | 0.345 |

| Study                              | Target group         | Intervention              | Format                        | Control     | Diagnosis     | Risk of bias        | Region        | N   | Hedges' g | SE    |
|------------------------------------|----------------------|---------------------------|-------------------------------|-------------|---------------|---------------------|---------------|-----|-----------|-------|
| Scogin, 1987 <sup>319</sup>        | Older Adults         | CBT-Based                 | Guided Self-Help              | Other & WL  | Cut-Off Score | Some Concern & High | North America | 17  | 1.0559    | 0.525 |
| Scogin, 1989 <sup>320</sup>        | Older Adults         | CBT-Based                 | Guided Self-Help              | WL          | Cut-Off Score | Some Concern & High | North America | 41  | 0.6585    | 0.330 |
| Scogin, 2014 <sup>321</sup>        | Older Adults         | CBT-Based                 | Individual                    | Other       | Cut-Off Score | Low                 | North America | 134 | 0.3767    | 0.170 |
| Scott, 1990 <sup>322</sup>         | Adults               | CBT-Based                 | Group & Individual            | WL          | Diagnosis     | Some Concern        | Europe        | 37  | 0.7876    | 0.388 |
| Scott, 1992 <sup>323</sup>         | Adults               | CBT-Based & Not-CBT-Based | Individual                    | CAU         | Diagnosis     | Some Concern        | Europe        | 58  | 0.2955    | 0.282 |
| Scott, 1997 <sup>324</sup>         | Adults               | CBT-Based                 | Individual                    | CAU         | Diagnosis     | Some Concern        | Europe        | 35  | 0.5661    | 0.380 |
| Segre, 2015 <sup>325</sup>         | Other Target Groups  | Not-CBT-Based             | Individual                    | WL          | Cut-Off Score | Some Concern        | North America | 69  | 0.4187    | 0.305 |
| Selmi, 1990 <sup>326</sup>         | Adults               | CBT-Based                 | Guided Self-Help & Individual | WL          | Diagnosis     | Some Concern        | North America | 24  | 1.0551    | 0.508 |
| Serfaty, 2009 <sup>327</sup>       | Older Adults         | CBT-Based                 | Individual                    | CAU & Other | Diagnosis     | Low                 | Europe        | 120 | 0.1750    | 0.180 |
| Serfaty, 2019 <sup>328</sup>       | General Medical      | CBT-Based                 | Individual                    | CAU         | Diagnosis     | Low                 | Europe        | 148 | 0.0946    | 0.165 |
| Serrano-Selva, 2012 <sup>329</sup> | Older Adults         | Not-CBT-Based             | Individual                    | Other       | Diagnosis     | Some Concern        | Europe        | 17  | 0.3850    | 0.490 |
| Serrano, 2004 <sup>330</sup>       | Older Adults         | Not-CBT-Based             | Individual                    | CAU         | Cut-Off Score | Some Concern        | Europe        | 43  | 0.9500    | 0.320 |
| Shaw, 1977 <sup>331</sup>          | Student Population   | CBT-Based                 | Group                         | WL & Other  | Cut-Off Score | Some Concern        | North America | 16  | 1.2453    | 0.533 |
| Sheeber, 2012 <sup>332</sup>       | Perinatal Depression | CBT-Based                 | Guided Self-Help              | WL          | Cut-Off Score | Low                 | North America | 62  | 0.8681    | 0.295 |
| Sheeber, 2017 <sup>333</sup>       | Perinatal Depression | CBT-Based                 | Guided Self-Help              | Other       | Cut-Off Score | Some Concern        | North America | 266 | 0.3100    | 0.120 |
| Shih, 2021 <sup>334</sup>          | Older Adults         | CBT-Based                 | Group                         | Other       | Cut-Off Score | Some Concern        | East Asia     | 57  | 0.510     | 0.270 |
| Sikander, 2019 <sup>335</sup>      | Perinatal Depression | CBT-Based                 | Other Formats                 | CAU         | Cut-Off Score | Low                 | Other Region  | 433 | 0.2219    | 0.110 |

| Study                               | Target group         | Intervention              | Format                           | Control | Diagnosis              | Risk of bias | Region        | N   | Hedges' g | SE    |
|-------------------------------------|----------------------|---------------------------|----------------------------------|---------|------------------------|--------------|---------------|-----|-----------|-------|
| Simoni, 2013 <sup>336</sup>         | General Medical      | CBT-Based                 | Individual                       | CAU     | Cut-Off Score          | Low          | North America | 40  | -0.1600   | 0.320 |
| Simpson, 2003 <sup>337</sup>        | Adults               | Not-CBT-Based             | Individual                       | CAU     | Diagnosis              | Low          | Europe        | 130 | 0.0116    | 0.190 |
| Simson, 2008 <sup>338</sup>         | General Medical      | Not-CBT-Based             | Individual                       | CAU     | Cut-Off Score          | Some Concern | Europe        | 30  | 0.2300    | 0.370 |
| Sinniah, 2017 <sup>339</sup>        | Other Target Groups  | CBT-Based                 | Individual                       | CAU     | Diagnosis              | Some Concern | East Asia     | 68  | 0.6936    | 0.285 |
| Sirey, 2021 <sup>340</sup>          | Other Target Groups  | Not-CBT-Based             | Individual                       | CAU     | Cut-Off Score          | Some Concern | North America | 50  | 0.790     | 0.480 |
| Smit, 2006 <sup>341</sup>           | Adults               | CBT-Based & Not-CBT-Based | Individual                       | CAU     | Diagnosis              | Low          | Europe        | 109 | -0.0806   | 0.253 |
| Smith, 2017 <sup>342</sup>          | Adults               | CBT-Based                 | Other Formats & Guided Self-Help | WL      | Diagnosis              | Low          | Australia     | 101 | 0.6292    | 0.220 |
| Songprakun, 2012 <sup>343</sup>     | Adults               | CBT-Based                 | Guided Self-Help                 | CAU     | Diagnosis              | Low          | East Asia     | 54  | 0.6000    | 0.270 |
| Spek, 2007 <sup>344</sup>           | Older Adults         | CBT-Based                 | Group & Other Formats            | WL      | Subclinical Depression | Low          | Europe        | 144 | 0.3411    | 0.195 |
| Spinelli, 2003 <sup>345</sup>       | Perinatal Depression | Not-CBT-Based             | Individual                       | Other   | Diagnosis              | Some Concern | North America | 42  | 0.7370    | 0.425 |
| Spinelli, 2013 <sup>346</sup>       | Perinatal Depression | Not-CBT-Based             | Other Formats                    | Other   | Diagnosis              | Some Concern | North America | 86  | -0.1500   | 0.250 |
| Spruill, 2021 <sup>347</sup>        | General Medical      | Not-CBT-Based             | Other Formats                    | CAU     | Cut-Off Score          | Low          | North America | 67  | 0.120     | 0.240 |
| Sreevani, 2013 <sup>348</sup>       | Adults               | Not-CBT-Based             | Group                            | CAU     | Diagnosis              | Some Concern | Other Region  | 30  | 0.9200    | 0.380 |
| Stiles-Shields, 2018 <sup>349</sup> | Adults               | CBT-Based                 | Guided Self-Help                 | WL      | Cut-Off Score          | Some Concern | North America | 18  | 1.1697    | 0.515 |
| Strauss, 2012 <sup>350</sup>        | Adults               | CBT-Based                 | Group                            | CAU     | Diagnosis              | Some Concern | Europe        | 28  | 1.8300    | 0.450 |
| Strong, 2008 <sup>351</sup>         | General Medical      | CBT-Based                 | Individual                       | CAU     | Diagnosis              | Low          | Europe        | 194 | 0.4392    | 0.165 |
| Sugg, 2018 <sup>352</sup>           | Adults               | Not-CBT-Based             | Individual                       | CAU     | Diagnosis              | Low          | Europe        | 65  | 0.8805    | 0.307 |

| Study                         | Target group        | Intervention  | Format                     | Control  | Diagnosis              | Risk of bias        | Region        | N   | Hedges' g | SE    |
|-------------------------------|---------------------|---------------|----------------------------|----------|------------------------|---------------------|---------------|-----|-----------|-------|
| Swartz, 2008 <sup>353</sup>   | Other Target Groups | Not-CBT-Based | Individual                 | CAU      | Diagnosis              | Some Concern & High | North America | 41  | 0.8482    | 0.330 |
| Szumaska, 2020 <sup>354</sup> | Adults              | CBT-Based     | Group                      | WL       | Diagnosis              | Some Concern        | Europe        | 20  | 1.4200    | 0.510 |
| Takagaki, 2016 <sup>355</sup> | Student Population  | CBT-Based     | Group                      | CAU      | Subclinical Depression | Low                 | East Asia     | 118 | 0.8900    | 0.190 |
| Talbot, 2011 <sup>356</sup>   | Other Target Groups | Not-CBT-Based | Individual                 | CAU      | Diagnosis              | Some Concern        | North America | 53  | 0.3050    | 0.280 |
| Taylor, 1977 <sup>357</sup>   | Student Population  | CBT-Based     | Individual                 | WL       | Cut-Off Score          | Some Concern        | North America | 14  | 1.4894    | 0.632 |
| Taylor, 2009 <sup>358</sup>   | General Medical     | CBT-Based     | Individual                 | WL       | Cut-Off Score          | Some Concern        | North America | 42  | 1.5988    | 0.447 |
| Teasdale, 1984 <sup>359</sup> | Adults              | CBT-Based     | Individual                 | CAU      | Diagnosis              | Some Concern        | Europe        | 34  | 1.4600    | 0.470 |
| Teichman, 1995 <sup>360</sup> | Adults              | CBT-Based     | Individual & Other Formats | WL       | Diagnosis              | Some Concern        | Other Region  | 30  | 0.8175    | 0.532 |
| Teri, 1997 <sup>361</sup>     | General Medical     | CBT-Based     | Other Formats              | CAU & WL | Diagnosis              | Some Concern        | North America | 42  | 0.9697    | 0.448 |
| Thomas, 2019 <sup>362</sup>   | General Medical     | CBT-Based     | Individual                 | CAU      | Cut-Off Score          | Low                 | Europe        | 30  | 0.2104    | 0.390 |
| Titov, 2010 <sup>363</sup>    | Adults              | CBT-Based     | Guided Self-Help           | WL       | Diagnosis              | Some Concern        | Australia     | 85  | 1.0602    | 0.314 |
| Titov, 2015a <sup>364</sup>   | Older Adults        | CBT-Based     | Guided Self-Help           | WL       | Cut-Off Score          | Low                 | Australia     | 42  | 2.1707    | 0.500 |
| Tobin, 2017 <sup>365</sup>    | General Medical     | CBT-Based     | Other Formats              | Other    | Cut-Off Score          | Low                 | North America | 315 | 0.0500    | 0.110 |
| Tomasino, 2017 <sup>366</sup> | Older Adults        | CBT-Based     | Guided Self-Help           | WL       | Cut-Off Score          | Some Concern        | North America | 26  | 0.4689    | 0.410 |
| Tong, 2019 <sup>367</sup>     | Adults              | CBT-Based     | Group                      | WL       | Diagnosis              | Some Concern        | East Asia     | 86  | 0.2725    | 0.315 |
| Tovote, 2014 <sup>368</sup>   | General Medical     | CBT-Based     | Individual                 | WL       | Cut-Off Score          | Some Concern        | Europe        | 63  | 0.6609    | 0.373 |
| Town, 2017 <sup>369</sup>     | Adults              | Not-CBT-Based | Individual                 | CAU      | Diagnosis              | Low                 | North America | 60  | 1.1820    | 0.482 |



| Study                                 | Target group         | Intervention              | Format           | Control | Diagnosis              | Risk of bias | Region        | N   | Hedges' g | SE    |
|---------------------------------------|----------------------|---------------------------|------------------|---------|------------------------|--------------|---------------|-----|-----------|-------|
| Trevillion, 2020 <sup>370</sup>       | Perinatal Depression | CBT-Based                 | Other Formats    | CAU     | Diagnosis              | Low          | Europe        | 51  | 0.3220    | 0.300 |
| Tulbure, 2018 <sup>371</sup>          | Adults               | CBT-Based                 | Guided Self-Help | WL      | Diagnosis              | Some Concern | Europe        | 53  | 0.8830    | 0.330 |
| Turner, 1979 <sup>372</sup>           | Adults               | CBT-Based                 | Individual       | Other   | Cut-Off Score          | Some Concern | North America | 34  | 0.0419    | 0.520 |
| Turner, 2013 <sup>373</sup>           | General Medical      | CBT-Based                 | Group            | Other   | Cut-Off Score          | Some Concern | Australia     | 44  | -0.1217   | 0.335 |
| Tyson, 1987 <sup>374</sup>            | Adults               | Not-CBT-Based             | Group            | Other   | Cut-Off Score          | Some Concern | North America | 22  | -0.1367   | 0.430 |
| Unlu-Ince, 2013 <sup>375</sup>        | Other Target Groups  | CBT-Based                 | Guided Self-Help | WL      | Cut-Off Score          | Some Concern | Europe        | 98  | 0.6925    | 0.323 |
| Van Bastelaar, 2011 <sup>376</sup>    | General Medical      | CBT-Based                 | Guided Self-Help | WL      | Cut-Off Score          | Low          | Europe        | 250 | 0.4581    | 0.155 |
| Van Lieshout, 2021 <sup>377</sup>     | Perinatal Depression | CBT-Based                 | Other Formats    | WL      | Cut-Off Score          | Low          | North America | 403 | 0.510     | 0.100 |
| Van Schaik, 2006 <sup>378</sup>       | Older Adults         | Not-CBT-Based             | Individual       | CAU     | Diagnosis              | Some Concern | Europe        | 131 | 0.1067    | 0.194 |
| Vazquez-Gonzalez, 2013 <sup>379</sup> | Other Target Groups  | CBT-Based                 | Group            | CAU     | Cut-Off Score          | Some Concern | Europe        | 176 | 1.6569    | 0.205 |
| Vazquez, 2017 <sup>380</sup>          | Other Target Groups  | CBT-Based                 | Other Formats    | CAU     | Subclinical Depression | Low          | Europe        | 40  | 2.0836    | 0.395 |
| Vazquez, 2020 <sup>381</sup>          | Other Target Groups  | CBT-Based                 | Other Formats    | CAU     | Subclinical Depression | Low          | Europe        | 142 | 1.0505    | 0.333 |
| Verduyn, 2003 <sup>382</sup>          | Other Target Groups  | CBT-Based & Not-CBT-Based | Group            | CAU     | Cut-Off Score          | Some Concern | Europe        | 42  | 0.1656    | 0.340 |
| Vernmark, 2010 <sup>383</sup>         | Adults               | CBT-Based                 | Guided Self-Help | WL      | Diagnosis              | Low          | Europe        | 54  | 0.8340    | 0.346 |
| Vigod, 2021 <sup>384</sup>            | Perinatal Depression | Not-CBT-Based             | Group            | WL      | Cut-Off Score          | Some Concern | North America | 77  | 0.150     | 0.230 |
| Vitriol, 2009 <sup>385</sup>          | Other Target Groups  | Not-CBT-Based             | Individual       | CAU     | Diagnosis              | Some Concern | Other Region  | 81  | 0.5599    | 0.407 |
| Warmerdam, 2008 <sup>386</sup>        | Adults               | CBT-Based                 | Guided Self-Help | WL      | Cut-Off Score          | Low          | Europe        | 175 | 0.4850    | 0.150 |

| Study                            | Target group         | Intervention              | Format                           | Control     | Diagnosis              | Risk of bias        | Region        | N   | Hedges' g | SE    |
|----------------------------------|----------------------|---------------------------|----------------------------------|-------------|------------------------|---------------------|---------------|-----|-----------|-------|
| Watkins, 2012 <sup>387</sup>     | Adults               | Not-CBT-Based             | Other Formats                    | CAU & Other | Diagnosis              | Low                 | Europe        | 68  | 0.4818    | 0.248 |
| Watt, 2000 <sup>388</sup>        | Older Adults         | Not-CBT-Based             | Group                            | Other       | Cut-Off Score          | Some Concern        | North America | 18  | 1.5514    | 0.570 |
| Weissman, 1979 <sup>389</sup>    | Adults               | Not-CBT-Based             | Individual                       | Other       | Diagnosis              | Some Concern        | North America | 34  | 1.1622    | 0.520 |
| Westerhof, 2019 <sup>390</sup>   | Adults               | Not-CBT-Based             | Guided Self-Help & Other Formats | WL          | Cut-Off Score          | Low                 | Europe        | 26  | -0.0450   | 0.400 |
| Wickberg, 1996 <sup>391</sup>    | Perinatal Depression | Not-CBT-Based             | Individual                       | CAU         | Diagnosis              | Some Concern        | Europe        | 30  | 1.3300    | 0.480 |
| Wiersma, 2014 <sup>392</sup>     | Adults               | Not-CBT-Based             | Individual                       | CAU         | Diagnosis              | Low                 | Europe        | 126 | 0.4740    | 0.220 |
| Wiklund, 2010 <sup>393</sup>     | Perinatal Depression | CBT-Based                 | Individual                       | CAU         | Cut-Off Score          | Some Concern        | Europe        | 66  | 0.8200    | 0.300 |
| Williams, 2000 <sup>394</sup>    | Older Adults         | CBT-Based                 | Individual                       | Other       | Diagnosis              | Low                 | North America | 151 | 0.0691    | 0.187 |
| Williams, 2013a <sup>395</sup>   | Adults               | CBT-Based                 | Guided Self-Help                 | WL          | Diagnosis              | Low                 | Australia     | 42  | 0.8822    | 0.338 |
| Williams, 2013b <sup>396</sup>   | Adults               | CBT-Based                 | Guided Self-Help                 | CAU         | Cut-Off Score          | Some Concern        | Europe        | 242 | 0.3032    | 0.145 |
| Williams, 2018 <sup>397</sup>    | Adults               | CBT-Based                 | Group                            | WL          | Cut-Off Score          | Low                 | Europe        | 104 | 0.6600    | 0.200 |
| Wilson, 1983 <sup>398</sup>      | Adults               | CBT-Based                 | Individual                       | WL          | Cut-Off Score          | Some Concern & High | Australia     | 17  | 1.9171    | 0.608 |
| Wollersheim, 1991 <sup>399</sup> | Adults               | CBT-Based & Not-CBT-Based | Group & Guided Self-Help         | WL          | Diagnosis              | Some Concern        | North America | 16  | 0.2389    | 0.617 |
| Wong, 2008a <sup>400</sup>       | Adults               | CBT-Based                 | Group                            | WL          | Cut-Off Score          | Some Concern        | East Asia     | 322 | 0.7400    | 0.120 |
| Wong, 2008b <sup>401</sup>       | Adults               | CBT-Based                 | Group                            | WL          | Diagnosis              | Some Concern        | East Asia     | 88  | 0.7600    | 0.220 |
| Wong, 2018 <sup>402</sup>        | Adults               | CBT-Based                 | Group                            | CAU         | Subclinical Depression | Low                 | East Asia     | 231 | 0.1900    | 0.130 |
| Wright, 2005 <sup>403</sup>      | Adults               | CBT-Based                 | Individual & Guided Self-Help    | WL          | Diagnosis              | Some Concern        | North America | NA  | 1.1017    | 0.395 |
| Wutrich, 2013 <sup>404</sup>     | Older Adults         | CBT-Based                 | Group                            | WL          | Diagnosis              | Some Concern        | Australia     | 53  | 0.8377    | 0.330 |

| Study                          | Target group         | Intervention  | Format           | Control | Diagnosis              | Risk of bias        | Region       | N   | Hedges' g | SE    |
|--------------------------------|----------------------|---------------|------------------|---------|------------------------|---------------------|--------------|-----|-----------|-------|
| Wuthrich, 2016 <sup>405</sup>  | Older Adults         | CBT-Based     | Group            | Other   | Diagnosis              | Low                 | Australia    | 144 | 0.5676    | 0.200 |
| Xie, 2019 <sup>406</sup>       | Older Adults         | CBT-Based     | Group            | CAU     | Cut-Off Score          | Some Concern        | East Asia    | 73  | 0.6800    | 0.240 |
| Yang, 2018 <sup>407</sup>      | Student Population   | Not-CBT-Based | Group            | CAU     | Diagnosis              | Some Concern        | East Asia    | 67  | 0.8000    | 0.250 |
| Yeung, 2017 <sup>408</sup>     | Adults               | CBT-Based     | Guided Self-Help | WL      | Cut-Off Score          | Some Concern        | East Asia    | NA  | 0.6100    | 0.260 |
| Yuan, 2020 <sup>409</sup>      | Older Adults         | CBT-Based     | Individual       | CAU     | Cut-Off Score          | Low                 | East Asia    | 49  | 0.1740    | 0.380 |
| Zemastani, 2020 <sup>410</sup> | General Medical      | CBT-Based     | Group            | Other   | Diagnosis              | Some Concern        | Other Region | 52  | 2.6200    | 0.380 |
| Zemestani, 2016 <sup>411</sup> | Student Population   | CBT-Based     | Group            | WL      | Diagnosis              | Some Concern        | Other Region | 30  | 0.6100    | 0.030 |
| Zemestani, 2019 <sup>412</sup> | Perinatal Depression | CBT-Based     | Group            | CAU     | Diagnosis              | Low                 | Other Region | 38  | 1.1800    | 0.120 |
| Zhao, 2019 <sup>413</sup>      | Perinatal Depression | Not-CBT-Based | Group            | CAU     | Subclinical Depression | Some Concern        | East Asia    | 245 | 0.4327    | 0.203 |
| Zhao, 2021 <sup>414</sup>      | Perinatal Depression | Not-CBT-Based | Individual       | CAU     | Cut-Off Score          | Some Concern        | East Asia    | 182 | 0.310     | 0.150 |
| Zu, 2014 <sup>415</sup>        | Adults               | CBT-Based     | Individual       | CAU     | Diagnosis              | Some Concern & High | East Asia    | 42  | 0.2501    | 0.357 |

Notes. Control: WL = Wait list; CAU = Care as Usual. Intervention: CBT = Cognitive Behavioral Therapy. Diagnosis: Diagnosis = Diagnosis by a mental health professional; Cut-Off Score = Diagnosis based on scoring above a critical threshold on a self-reported questionnaire.

## References of included primary studies

1. Aagaard J, Foldager L, Makki A, Hansen V, Møller-Nielsen K. The efficacy of psychoeducation on recurrent depression: a randomized trial with a 2-year follow-up. *Nord J Psychiatry*. 2017;71(3):223-229. doi:10.1080/08039488.2016.1266385
2. Abas M, Nyamayaro P, Bere T, et al. Feasibility and acceptability of a task-shifted intervention to enhance adherence to HIV medication and improve depression in people living with HIV in Zimbabwe, a low income country in sub-Saharan Africa. *AIDS Behav*. 2018;22(1):86-101. doi:10.1007/s10461-016-1659-4
3. Ahmadpanah M, Paghale SJ, Bakhtyari A, et al. Effects of psychotherapy in combination with pharmacotherapy, when compared to pharmacotherapy only on blood pressure, depression, and anxiety in female patients with hypertension. *J Health Psychol*. 2016;21(7):1216-1227. doi:10.1177/1359105314550350
4. Alexopoulos G, Raue P, McCulloch C, et al. Clinical Case Management versus Case Management with Problem-Solving Therapy in Low-Income, Disabled Elders with Major Depression: A Randomized Clinical Trial. *Am J Geriatr Psychiatry Off J Am Assoc Geriatr Psychiatry*. 2016;24(1):50-59. doi:10.1016/j.jagp.2015.02.007
5. Afonso R, Bueno B. Efectos de un programa de reminiscencia sobre la sintomatología depresiva en una muestra de población mayor portuguesa. *Rev Esp Geriatria Gerontol*. 2009;44(6):317-322.
6. Alhusen JL, Hayat MJ, Borg L. A pilot study of a group-based perinatal depression intervention on reducing depressive symptoms and improving maternal-fetal attachment and maternal sensitivity. *Arch Womens Ment Health*. 2021;24(1):145-154. doi:10.1007/s00737-020-01032-0
7. Allart-Van Dam E, Hosman CMH, Hoogduin CAL, Schaap CPDR. The coping with depression course: Short-term outcomes and mediating effects of a randomized controlled trial in the treatment of subclinical depression. *Behav Ther*. 2003;34(3):381-396. doi:10.1016/S0005-7894(03)80007-2
8. Amani B, Merza D, Savoy C, et al. Peer-Delivered Cognitive-Behavioral Therapy for Postpartum Depression: A Randomized Controlled Trial. *J Clin Psychiatry*. 2021;83(1). doi:10.4088/JCP.21m13928
9. Ammerman RT, Putnam FW, Altaye M, Stevens J, Teeters AR, Van Ginkel JB. A clinical trial of in-home CBT for depressed mothers in home visitation. *Behav Ther*. 2013;44(3):359-372. doi:10.1016/j.beth.2013.01.002
10. Andersson G, Bergström J, Hollnagel E, Carlbring P, Kaldö V, Ekselius L. Internet-based self-help for depression: randomised controlled trial. *Br J Psychiatry*. 2005;187:456-461. doi:10.1192/bjp.187.5.456
11. Araya R, Menezes PR, Claro HG, et al. Effect of a Digital Intervention on Depressive Symptoms in Patients With Comorbid Hypertension or Diabetes in Brazil and Peru: Two Randomized Clinical Trials. *Jama*. 2021;325(18):1852-1862. doi:10.1001/jama.2021.4348
12. Arean PA, Perri MG, Nezu AM, Schein RL, Christopher F, Joseph TX. Comparative effectiveness of social problem-solving therapy and reminiscence therapy as treatments for depression in older adults. *J Consult Clin Psychol*. 1993;61(6):1003-1010. doi:10.1037//0022-006x.61.6.1003

13. Arjadi R, Nauta MH, Scholte WF, et al. Internet-based behavioural activation with lay counsellor support versus online minimal psychoeducation without support for treatment of depression: a randomised controlled trial in Indonesia. *Lancet Psychiatry*. 2018;5(9):707-716. doi:10.1016/S2215-0366(18)30223-2
14. Ayen I, Hautzinger M. Cognitive behavior therapy for depression in menopausal women. A controlled, randomized treatment study. *Z Klin Psychol Psychother*. 2004;33(4):290-299. doi:10.1026/1616-3443.33.4.290
15. Barber JP, Barrett MS, Gallop R, Rynn MA, Rickels K. Short-term dynamic psychotherapy versus pharmacotherapy for major depressive disorder: a randomized, placebo-controlled trial. *J Clin Psychiatry*. 2012;73(1):66-73. doi:10.4088/JCP.11m06831
16. Barnhofer T, Crane C, Hargus E, Amarasinghe M, Winder R, Williams JM. Mindfulness-based cognitive therapy as a treatment for chronic depression: A preliminary study. *Behav Res Ther*. 2009;47(5):366-373. doi:10.1016/j.brat.2009.01.019
17. Barrett JE, Williams Jr JW, Oxman TE, et al. Treatment of dysthymia and minor depression in primary care: A randomized trial in patients aged 18 to 59 years. *J Fam Pract*. 2001;50(5):405-412.
18. Baumeister H, Paganini S, Sander LB, et al. Effectiveness of a Guided Internet- and Mobile-Based Intervention for Patients with Chronic Back Pain and Depression (WARD-BP): A Multicenter, Pragmatic Randomized Controlled Trial. *Psychother Psychosom*. 2021;90(4):255-268. doi:10.1159/000511881
19. Baumgartner C, Schaub MP, Wenger A, et al. "Take Care of You" - Efficacy of integrated, minimal-guidance, internet-based self-help for reducing co-occurring alcohol misuse and depression symptoms in adults: Results of a three-arm randomized controlled trial. *Drug Alcohol Depend*. 2021;225:108806. doi:10.1016/j.drugalcdep.2021.108806
20. Beach SRH, O'Leary KD. Treating depression in the context of marital discord: Outcome and predictors of response of marital therapy versus cognitive therapy. *Behav Ther*. 1992;23(4):507-528. doi:10.1016/S0005-7894(05)80219-9
21. Bedard M, Felteau M, Marshall S, et al. Mindfulness-based cognitive therapy reduces symptoms of depression in people with a traumatic brain injury: Results from a randomized controlled trial. *J Head Trauma Rehabil*. 2014;29(4):E13-E22. doi:10.1097/HTR.0b013e3182a615a0
22. Beeber LS, Holditch-Davis D, Perreira K, et al. Short-term in-home intervention reduces depressive symptoms in Early Head Start Latina mothers of infants and toddlers. *Res Nurs Health*. 2010;33(1):60-76. doi:10.1002/nur.20363
23. Bendig E, Bauereiß N, Buntrock C, Habibović M, Ebert DD, Baumeister H. Lessons learned from an attempted randomized-controlled feasibility trial on "WIDeCAD" - An internet-based depression treatment for people living with coronary artery disease (CAD). *Internet Interv*. 2021;24. doi:10.1016/j.invent.2021.100375
24. Berger T, Hämmerli K, Gubser N, Andersson G, Caspar F. Internet-based treatment of depression: a randomized controlled trial comparing guided with unguided self-help. *Cogn Behav Ther*. 2011;40(4):251-266. doi:10.1080/16506073.2011.616531
25. Beutel ME, Weissflog G, Leuteritz K, et al. Efficacy of short-term psychodynamic psychotherapy (STPP) with depressed breast cancer patients: Results of a randomized controlled multicenter trial. *Ann Oncol*. 2014;25(2):378-384. doi:10.1093/annonc/mdt526

26. Boele FW, Klein M, Verdonck-de Leeuw IM, et al. Internet-based guided self-help for glioma patients with depressive symptoms: a randomized controlled trial. *J Neurooncol.* 2018;137(1):191-203. doi:10.1007/s11060-017-2712-5
27. Boeschoten RE, Dekker J, Uitdehaag BMJ, et al. Internet-based treatment for depression in multiple sclerosis: A randomized controlled trial. *Mult Scler.* 2017;23(8):1112-1122. doi:10.1177/1352458516671820
28. Bohlmeijer ET, Fledderus M, Rokx TA, Pieterse ME. Efficacy of an early intervention based on acceptance and commitment therapy for adults with depressive symptomatology: Evaluation in a randomized controlled trial. *Behav Res Ther.* 2011;49(1):62-67. doi:10.1016/j.brat.2010.10.003
29. Bolton P, Bass J, Neugebauer R, et al. Group interpersonal psychotherapy for depression in rural Uganda: a randomized controlled trial. *Jama.* 2003;289(23):3117-3124. doi:10.1001/jama.289.23.3117
30. Bower JE, Partridge AH, Wolff AC, et al. Targeting Depressive Symptoms in Younger Breast Cancer Survivors: The Pathways to Wellness Randomized Controlled Trial of Mindfulness Meditation and Survivorship Education. *J Clin Oncol.* 2021;39(31):3473-3484. doi:10.1200/jco.21.00279
31. Bowman D, Scogin F, Lyrene B. The efficacy of self-examination therapy and cognitive bibliotherapy in the treatment of mild to moderate depression. *Psychother Res.* 1995;5(2):131-140. doi:10.1080/10503309512331331256
32. Braun L, Titzler I, Terhorst Y, et al. Effectiveness of guided internet-based interventions in the indicated prevention of depression in green professions (PROD-A): Results of a pragmatic randomized controlled trial. *J Affect Disord.* 2021;278:658-671. doi:10.1016/j.jad.2020.09.066
33. Brown RA, Lewinsohn PM. A psychoeducational approach to the treatment of depression: comparison of group, individual, and minimal contact procedures. *J Consult Clin Psychol.* 1984;52(5):774. doi:10.1037//0022-006x.52.5.774
34. Buhrman M, Syk M, Burvall O, Hartig T, Gordh T, Andersson G. Individualized guided internet-delivered cognitive-behavior therapy for chronic pain patients with comorbid depression and anxiety: A randomized controlled trial. *Clin J Pain.* 2015;31(6):504-516. doi:10.1097/AJP.0000000000000176
35. Buntrock C, Ebert D, Lehr D, et al. Effectiveness of a Web-Based Cognitive Behavioural Intervention for Subthreshold Depression: Pragmatic Randomised Controlled Trial. *Psychother Psychosom.* 2015;84(6):348-358. doi:10.1159/000438673
36. Burmaoğlu GE. Comparison of the effect of mindfulness based on stress reduction and dialectical behavior therapy on reducing depression in mothers with handicapped children in rehabilitation centers. *Pak J Med Health Sci.* 2021;15(3):885-890.
37. Burns A, Banerjee S, Morris J, et al. Treatment and prevention of depression after surgery for hip fracture in older people: randomized, controlled trials. *J Am Geriatr Soc.* 2007;55(1):75-80. doi:10.1111/j.1532-5415.2007.01016.x
38. Burns A, O'Mahen H, Baxter H, et al. A pilot randomised controlled trial of cognitive behavioural therapy for antenatal depression. *BMC Psychiatry.* 2013;13:33. doi:10.1186/1471-244x-13-33

39. Carlbring P, Hagglund M, Luthstrom A, et al. Internet-based behavioral activation and acceptance-based treatment for depression: a randomized controlled trial. *J Affect Disord.* 2013;148(2-3):331-337. doi:10.1016/j.jad.2012.12.020
40. Carr A, Finnegan L, Griffin E, Cotter P, Hyland A. A Randomized Controlled Trial of the Say Yes to Life (SYTL) Positive Psychology Group Psychotherapy Program for Depression: An Interim Report. *J Contemp Psychother.* 2017;47(3):153-161. doi:10.1007/s10879-016-9343-6
41. Carta MG, Petretto D, Adamo S, et al. Counseling in primary care improves depression and quality of life. *Clin Pract Epidemiol Ment Health.* 2012;8:152-157. doi:10.2174/1745017901208010152
42. Casanas R, Catalan R, del Val JL, Real J, Valero S, Casas M. Effectiveness of a psycho-educational group program for major depression in primary care: a randomized controlled trial. *BMC Psychiatry.* 2012;12:230. doi:10.1186/1471-244x-12-230
43. Castonguay LG, Schut AJ, Aikens DE, et al. Integrative Cognitive Therapy for Depression: A Preliminary Investigation. *J Psychother Integr.* 2004;14(1):4-20. doi:10.1037/1053-0479.14.1.4
44. Chan AS, Wong QY, Sze SL, Kwong PP, Han YM, Cheung MC. A Chinese Chan-based mind-body intervention for patients with depression. *J Affect Disord.* 2012;142(1-3):283-289. doi:10.1016/j.jad.2012.05.018
45. Chan MF, Ng SE, Tien A, Man Ho RC, Thayala J. A randomised controlled study to explore the effect of life story review on depression in older Chinese in Singapore. *Health Soc Care Community.* 2013;21(5):545-553. doi:10.1111/hsc.12043
46. Chen CH, Tseng YF, Chou FH, Wang SY. Effects of support group intervention in postnatally distressed women. A controlled study in Taiwan. *J Psychosom Res.* 2000;49(6):395-399. doi:10.1016/s0022-3999(00)00180-x
47. Chesney MA, Chambers DB, Taylor JM, Johnson LM, Folkman S. Coping effectiveness training for men living with HIV: results from a randomized clinical trial testing a group-based intervention. *Psychosom Med.* 2003;65(6):1038-1046. doi:10.1097/01.psy.0000097344.78697.ed
48. Chiang KJ, Chen TH, Hsieh HT, Tsai JC, Ou KL, Chou KR. One-Year Follow-Up of the Effectiveness of Cognitive Behavioral Group Therapy for Patients' Depression: A Randomized, Single-Blinded, Controlled Study. *Sci World J.* 2015;2015:373149. doi:10.1155/2015/373149
49. Cho HJ, Kwon JH, Lee JJ. Antenatal cognitive-behavioral therapy for prevention of postpartum depression: a pilot study. *Yonsei Med J.* 2008;49(4):553-562. doi:10.3349/ymj.2008.49.4.553
50. Choi I, Zou J, Titov N, et al. Culturally attuned Internet treatment for depression amongst Chinese Australians: a randomised controlled trial. *J Affect Disord.* 2012;136(3):459-468. doi:10.1016/j.jad.2011.11.003
51. Choi NG, Hegel MT, Marti CN, Marinucci ML, Sirrianni L, Bruce ML. Telehealth problem-solving therapy for depressed low-income homebound older adults. *Am J Geriatr Psychiatry.* 2014;22(3):263-271. doi:10.1016/j.jagp.2013.01.037
52. Choi NG, Marti CN, Wilson NL, et al. Effect of Telehealth Treatment by Lay Counselors vs by Clinicians on Depressive Symptoms Among Older Adults Who Are Homebound: A Randomized Clinical Trial. *JAMA Netw Open.* 2020;3(8):e2015648. doi:10.1001/jamanetworkopen.2020.15648

53. Chowdhary N, Anand A, Dimidjian S, et al. The healthy activity program lay counsellor delivered treatment for severe depression in India: Systematic development and randomised evaluation. *Br J Psychiatry*. 2016;208(4):381-388. doi:10.1192/bjp.bp.114.161075
54. Choy J, Lou V. Effectiveness of the Modified Instrumental Reminiscence Intervention on Psychological Well-Being Among Community-Dwelling Chinese Older Adults: A Randomized Controlled Trial. *Am J Geriatr Psychiatry Off J Am Assoc Geriatr Psychiatry*. 2016;24(1):60-69. doi:10.1016/j.jagp.2015.05.008
55. Clark R, Tluczek A, Wenzel A. Psychotherapy for Postpartum Depression: A Preliminary Report. *Am J Orthopsychiatry*. 2003;73(4):441-454. doi:10.1037/0002-9432.73.4.441
56. Clark R, Tluczek A, Brown R. A mother–infant therapy group model for postpartum depression. *Infant Ment Health J*. 2008;29(5):514-536. doi:10.1002/imhj.20189
57. Cohen S, O’Leary KD, Foran H. A randomized clinical trial of a brief, problem-focused couple therapy for depression. *Behav Ther*. 2010;41(4):433-446. doi:10.1016/j.beth.2009.11.004
58. Cooper PJ, Murray L, Wilson A, Romaniuk H. Controlled trial of the short- and long-term effect of psychological treatment of post-partum depression. I. Impact on maternal mood. *Br J Psychiatry*. 2003;182:412-419. doi:10.1192/bjp.182.5.412
59. Cramer H, Salisbury C, Conrad J, Eldred J, Araya R. Group cognitive behavioural therapy for women with depression: pilot and feasibility study for a randomised controlled trial using mixed methods. *BMC Psychiatry*. 2011;11:82. doi:10.1186/1471-244x-11-82
60. D’Elia A, Bawor M, Dennis BB, et al. Feasibility of behavioral activation group therapy in reducing depressive symptoms and improving quality of life in patients with depression: The BRAVE pilot trial. *Pilot Feasibility Stud*. 2020;6(1). doi:10.1186/s40814-020-00596-z
61. Davoudi M, Taheri AA, Foroughi AA, Ahmadi SM, Heshmati K. Effectiveness of acceptance and commitment therapy (ACT) on depression and sleep quality in painful diabetic neuropathy: a randomized clinical trial. *J Diabetes Metab Disord*. Published online 2020. doi:10.1007/s40200-020-00609-x
62. De Groot M, Shubrook JH, Hornsby WG, et al. Program ACTIVE II: Outcomes from a randomized, multistate community-based depression treatment for rural and urban adults with type 2 diabetes. *Diabetes Care*. 2019;42(7):1185-1193. doi:10.2337/dc18-2400
63. De Jong M, Peeters F, Gard T, et al. A randomized controlled pilot study on mindfulness-based cognitive therapy for unipolar depression in patients with chronic pain. *J Clin Psychiatry*. 2018;79(1):26-34. doi:10.4088/JCP.15m10160
64. Dekker RL, Moser DK, Peden AR, Lennie TA. Cognitive therapy improves three-month outcomes in hospitalized patients with heart failure. *J Card Fail*. 2012;18(1):10-20. doi:10.1016/j.cardfail.2011.09.008
65. Dennis CL, Grigoriadis S, Zupancic J, Kiss A, Ravitz P. Telephone-based nurse-delivered interpersonal psychotherapy for postpartum depression: nationwide randomised controlled trial. *Br J Psychiatry*. 2020;216(4):189-196. doi:10.1192/bjp.2019.275
66. DeRubeis RJ, Hollon SD, Amsterdam JD, et al. Cognitive therapy vs medications in the treatment of moderate to severe depression. *Arch Gen Psychiatry*. 2005;62(4):409-416. doi:10.1001/archpsyc.62.4.409



67. Desautels C, Savard J, Ivers H, Savard MH, Caplette-Gingras A. Treatment of Depressive Symptoms in Patients with Breast Cancer: A Randomized Controlled Trial Comparing Cognitive Therapy and Bright Light Therapy. *Health Psychol.* 2017;37(1):1-13. doi:10.1037/hea0000539
68. Dimidjian S, Hollon SD, Dobson KS, et al. Randomized trial of behavioral activation, cognitive therapy, and antidepressant medication in the acute treatment of adults with major depression. *J Consult Clin Psychol.* 2006;74(4):658-670. doi:10.1037/0022-006x.74.4.658
69. Dimidjian S, Goodman S, Sherwood N, et al. A Pragmatic Randomized Clinical Trial of Behavioral Activation for Depressed Pregnant Women. *J Consult Clin Psychol.* 2017;85(1):26-36. doi:10.1037/ccp0000151
70. Dindo L, Recober A, Marchman JN, Turvey C, O'Hara MW. One-day behavioral treatment for patients with comorbid depression and migraine: A pilot study. *Behav Res Ther.* 2012;50(9):537-543. doi:10.1016/j.brat.2012.05.007
71. Dindo LN, Recober A, Calarge CA, et al. One-Day Acceptance and Commitment Therapy Compared to Support for Depressed Migraine Patients: a Randomized Clinical Trial. *Neurotherapeutics.* 2019;17(2):743-753. doi:10.1007/s13311-019-00818-0
72. Dobkin RD, Menza M, Allen LA, et al. Cognitive-behavioral therapy for depression in Parkinson's disease: a randomized, controlled trial. *Am J Psychiatry.* 2011;168(10):1066-1074. doi:10.1176/appi.ajp.2011.10111669
73. Dobkin RD, Mann SL, Gara MA, Interian A, Rodriguez KM, Menza M. Telephone-based cognitive behavioral therapy for depression in Parkinson disease: A randomized controlled trial. *Neurology.* 2020;94(16):e1764-e1773. doi:10.1212/wnl.00000000000009292
74. Dobkin RD, Mann SL, Weintraub D, et al. Innovating Parkinson's Care: A Randomized Controlled Trial of Telemedicine Depression Treatment. *Mov Disord.* 2021;36(11):2549-2558. doi:10.1002/mds.28548
75. Doering LV, Chen B, Cross Bodan R, Magsarili MC, Nyamathi A, Irwin MR. Early cognitive behavioral therapy for depression after cardiac surgery. *J Cardiovasc Nurs.* 2013;28(4):370-379. doi:10.1097/JCN.0b013e31824d967d
76. Dong X, Sun G, Zhan J, et al. Telephone-based reminiscence therapy for colorectal cancer patients undergoing postoperative chemotherapy complicated with depression: a three-arm randomised controlled trial. *Support Care Cancer Off J Multinatl Assoc Support Care Cancer.* 2019;27(8):2761-2769. doi:10.1007/s00520-018-4566-6
77. Duarte PS, Miyazaki MC, Blay SL, Sesso R. Cognitive-behavioral group therapy is an effective treatment for major depression in hemodialysis patients. *Kidney Int.* 2009;76(4):414-421. doi:10.1038/ki.2009.156
78. Dwight-Johnson M, Aisenberg E, Golinelli D, Hong S, O'Brien M, Ludman E. Telephone-Based Cognitive-Behavioral Therapy for Latino Patients Living in Rural Areas: A Randomized Pilot Study. *Psychiatr Serv.* 2011;62(8):936-942. doi:10.1176/ps.62.8.pss6208\_0936
79. Ebert DD, Lehr D, Boß L, et al. Efficacy of an internet-based problem-solving training for teachers: results of a randomized controlled trial. *Scand J Work Environ Health.* 2014;40(6):582-596. doi:10.5271/sjweh.3449
80. Ebert DD, Buntrock C, Lehr D, et al. Effectiveness of Web- and Mobile-Based Treatment of Subthreshold Depression With Adherence-Focused Guidance: A Single-Blind Randomized Controlled Trial. *Behav Ther.* 2018;49(1):71-83. doi:10.1016/j.beth.2017.05.004

81. Ede MO, Igbo JN, Eseadi C, et al. Effect of group cognitive behavioural therapy on depressive symptoms in a sample of college adolescents in Nigeria. *J Ration-Emotive Cogn-Behav Ther.* 2020;38(3):306-318. doi:10.1007/s10942-019-00327-1
82. Ekers D, Richards D, McMillan D, Bland JM, Gilbody S. Behavioural activation delivered by the non-specialist: phase II randomised controlled trial. *Br J Psychiatry.* 2011;198(1):66-72. doi:10.1192/bjp.bp.110.079111
83. Ekkers W, Korrelboom K, Huijbrechts I, Smits N, Cuijpers P, Gaag M. Competitive Memory Training for treating depression and rumination in depressed older adults: a randomized controlled trial. *Behav Res Ther.* 2011;49(10):588-596. doi:10.1016/j.brat.2011.05.010
84. Elkin I, Shea MT, Watkins JT, et al. National Institute of Mental Health Treatment of Depression Collaborative Research Program. General effectiveness of treatments. *Arch Gen Psychiatry.* 1989;46(11):971-982; discussion 983. doi:10.1001/archpsyc.1989.01810110013002
85. Embling S. The effectiveness of cognitive behavioural therapy in depression. *Nurs Stand.* 2002;17(14-15):33-41. doi:10.7748/ns2002.12.17.14.33.c3318
86. Eseadi C, Obidoa MA, Ogbuabor SE, Ikechukwu-Ilomuanya AB. Effects of Group-Focused Cognitive-Behavioral Coaching Program on Depressive Symptoms in a Sample of Inmates in a Nigerian Prison. *Int J Offender Ther Comp Criminol.* 2018;62(6):1589-1602. doi:10.1177/0306624X16687046
87. Euteneuer F, Dannehl K, Del Rey A, Engler H, Schedlowski M, Rief W. Immunological effects of behavioral activation with exercise in major depression: An exploratory randomized controlled trial. *Transl Psychiatry.* 2017;7(5):e1132. doi:10.1038/tp.2017.76
88. Evans RL, Connis RT. Comparison of brief group therapies for depressed cancer patients receiving radiation treatment. *Public Health Rep.* 1995;110(3):306-311.
89. Fann JR, Bombardier CH, Vannoy S, et al. Telephone and In-Person Cognitive Behavioral Therapy for Major Depression after Traumatic Brain Injury: A Randomized Controlled Trial. *J Neurotrauma.* 2015;32(1):45-57. doi:10.1089/neu.2014.3423
90. Faramarzi M, Alipor A, Esmaelzadeh S, Kheirkhah F, Poladi K, Pash H. Treatment of depression and anxiety in infertile women: cognitive behavioral therapy versus fluoxetine. *J Affect Disord.* 2008;108(1-2):159-164. doi:10.1016/j.jad.2007.09.002
91. Fledderus M, Bohlmeijer ET, Pieterse ME, Schreurs KM. Acceptance and commitment therapy as guided self-help for psychological distress and positive mental health: a randomized controlled trial. *Psychol Med.* 2012;42(3):485-495. doi:10.1017/s0033291711001206
92. Floyd M, Scogin F, McKendree-Smith NL, Floyd DL, Rokke PD. Cognitive therapy for depression: a comparison of individual psychotherapy and bibliotherapy for depressed older adults. *Behav Modif.* 2004;28(2):297-318. doi:10.1177/0145445503259284
93. Flygare AL, Engström I, Hasselgren M, et al. Internet-based CBT for patients with depressive disorders in primary and psychiatric care: Is it effective and does comorbidity affect outcome? *Internet Interv.* 2020;19. doi:10.1016/j.invent.2019.100303
94. Folke F, Parling T, Melin L. Acceptance and commitment therapy for depression: A preliminary randomized clinical trial for unemployed on long-term sick leave. *Cogn Behav Pract.* 2012;19(4):583-594. doi:10.1016/j.cbpra.2012.01.002

95. Fonagy P, Rost F, Carlyle JA, et al. Pragmatic randomized controlled trial of long-term psychoanalytic psychotherapy for treatment-resistant depression: The Tavistock Adult Depression Study (TADS). *World Psychiatry*. 2015;14(3):312-321. doi:10.1002/wps.20267
96. Forand NR, Barnett JG, Strunk DR, Hindiyeh MU, Feinberg JE, Keefe JR. Efficacy of Guided iCBT for Depression and Mediation of Change by Cognitive Skill Acquisition. *Behav Ther*. 2018;49(2):295-307. doi:10.1016/j.beth.2017.04.004
97. Forsell E, Bendix M, Holländare F, et al. Internet delivered cognitive behavior therapy for antenatal depression: A randomised controlled trial. *J Affect Disord*. 2017;221:56-64. doi:10.1016/j.jad.2017.06.013
98. Frangou E, Bertelli G, Love S, et al. OVPSYCH2: A randomized controlled trial of psychological support versus standard of care following chemotherapy for ovarian cancer. *Gynecol Oncol*. 2021;162(2):431-439. doi:10.1016/j.ygyno.2021.05.024
99. Freedland KE, Skala JA, Carney RM, et al. Treatment of depression after coronary artery bypass surgery: a randomized controlled trial. *Arch Gen Psychiatry*. 2009;66(4):387-396. doi:10.1001/archgenpsychiatry.2009.7
100. Freedland KE, Carney RM, Rich MW, Steinmeyer BC, Rubin EH. Cognitive behavior therapy for depression and self-care in heart failure patients a randomized clinical trial. *JAMA Intern Med*. 2015;175(11):1773-1782. doi:10.1001/jamainternmed.2015.5220
101. Fry P. Structured and unstructured reminiscence training and depression among the elderly. *Clin Gerontol*. 1983;1(3):15-37. doi:10.1300/J018v01n03\_06
102. Fuhr DC, Weobong B, Lazarus A, et al. Delivering the Thinking Healthy Programme for perinatal depression through peers: An individually randomised controlled trial in India. *Lancet Psychiatry*. 2019;6(2):115-127. doi:10.1016/S2215-0366(18)30466-8
103. Funderburk JS, Pigeon WR, Shepardson RL, et al. Treating depressive symptoms among veterans in primary care: A multi-site RCT of brief behavioral activation. *J Affect Disord*. 2021;283:11-19. doi:10.1016/j.jad.2021.01.033
104. Furukawa TA, Horikoshi M, Kawakami N, et al. Telephone cognitive-behavioral therapy for subthreshold depression and presenteeism in workplace: a randomized controlled trial. *PLoS One*. 2012;7(4):e35330. doi:10.1371/journal.pone.0035330
105. García-Peña C, Vázquez-Estupiñan F, Avalos-Pérez F, Jiménez LVR, Sánchez-García S, Juárez-Cedillo T. Clinical effectiveness of group cognitive-behavioural therapy for depressed older people in primary care: A randomised controlled trial. *Salud Ment*. 2015;38(1):33-39. doi:10.17711/SM.0185-3325.2015.004
106. Gawrysiak M, Nicholas C, Hopko DR. Behavioral activation for moderately depressed university students: Randomized controlled trial. *J Couns Psychol*. 2009;56(3):468-475. doi:10.1037/a0016383
107. Gellis ZD, McGinty J, Tierney L, Jordan C, Burton J, Misener E. Randomized controlled trial of problem-solving therapy for minor depression in home care. [References]. *Res Soc Work Pract*. 2008;18(6):596-606. doi:10.1177/1049731507309821
108. Gellis ZD, Bruce ML. Problem solving therapy for subthreshold depression in home healthcare patients with cardiovascular disease. *Am J Geriatr Psychiatry*. 2010;18(6):464-474. doi:10.1097/jgp.0b013e3181b21442

109. Geraedts AS, Kleiboer AM, Wiezer NM, van Mechelen W, Cuijpers P. Short-term effects of a web-based guided self-help intervention for employees with depressive symptoms: randomized controlled trial. *J Med Internet Res*. 2014;16(5):e121. doi:10.2196/jmir.3185
110. Ghorbani V, Zanjani Z, Omidi A, Sarvizadeh M. Efficacy of acceptance and commitment therapy (ACT) on depression, pain acceptance, and psychological flexibility in married women with breast cancer: a pre- and post-test clinical trial. *Trends Psychiatry Psychother*. 2021;43(2):126-133. doi:10.47626/2237-6089-2020-0022
111. Gibbons MB, Thompson SM, Scott K, et al. Supportive-expressive dynamic psychotherapy in the community mental health system: a pilot effectiveness trial for the treatment of depression. *Psychother Chic*. 2012;49(3):303-316. doi:10.1037/a0027694
112. Gitlin LN, Harris LF, McCoy MC, et al. A home-based intervention to reduce depressive symptoms and improve quality of life in older African Americans: a randomized trial. *Ann Intern Med*. 2013;159(4):243-252. doi:10.7326/0003-4819-159-4-201308200-00005
113. Goodman JH, Prager J, Goldstein R, Freeman M. Perinatal Dyadic Psychotherapy for postpartum depression: a randomized controlled pilot trial. *Arch Womens Ment Health*. 2015;18(3):493-506. doi:10.1007/s00737-014-0483-y
114. Greenberg J, Datta T, Shapero BG, Sevinc G, Mischoulon D, Lazar SW. Compassionate hearts protect against wandering minds: Self-compassion moderates the effect of mind-wandering on depression. *Spiritual Clin Pract*. 2018;5(3):155-169. doi:10.1037/scp0000168
115. Grote NK, Swartz HA, Geibel SL, Zuckoff A, Houck PR, Frank E. A randomized controlled trial of culturally relevant, brief interpersonal psychotherapy for perinatal depression. *Psychiatr Serv*. 2009;60(3):313-321. doi:10.1176/appi.ps.60.3.313
116. Hagen R, Hjemdal O, Solem S, et al. Metacognitive therapy for depression in adults: A waiting list randomized controlled trial with six months follow-up. *Front Psychol*. 2017;8:31. doi:10.3389/fpsyg.2017.00031
117. Hallford D, Mellor D. Autobiographical memory-based intervention for depressive symptoms in young adults: A randomized controlled trial of cognitive-remembrance therapy. *Psychother Psychosom*. 2016;85(4):246-249. doi:10.1159/000444417
118. Hallgren M, Kraepelien M, Öjehagen A, et al. Physical exercise and internet-based cognitive-behavioural therapy in the treatment of depression: Randomised controlled trial. *Br J Psychiatry*. 2015;207(3):227-234. doi:10.1192/bjp.bp.114.160101
119. Hamamci Z. Integrating psychodrama and cognitive behavioral therapy to treat moderate depression. *Arts Psychother*. 2006;33(3):199-207. doi:10.1016/j.aip.2006.02.001
120. Hamdan-Mansour AM, Puskar K, Bandak AG. Effectiveness of cognitive-behavioral therapy on depressive symptomatology, stress and coping strategies among Jordanian university students. *Issues Ment Health Nurs*. 2009;30(3):188-196. doi:10.1080/01612840802694577
121. Han YMY, Sze SL, Wong QY, Chan AS. A mind-body lifestyle intervention enhances emotional control in patients with major depressive disorder: a randomized, controlled study. *Cogn Affect Behav Neurosci*. 2020;20(5):1056-1069. doi:10.3758/s13415-020-00819-z
122. Haringsma R, Engels G, Cuijpers P, Spinhoven P. Effectiveness of the Coping With Depression (CWD) course for older adults provided by the community-based mental health care system in the Netherlands: a randomized controlled field trial. *Int Psychogeriatr*. 2006;18(02):307-325. doi:10.1017/S104161020500253X

123. Harley R, Sprich S, Safren S, Jacobo M, Fava M. Adaptation of dialectical behavior therapy skills training group for treatment-resistant depression. *J Nerv Ment Dis.* 2008;196(2):136-143. doi:10.1097/NMD.0b013e318162aa3f
124. Harrer M, Apolinário-Hagen J, Fritsche L, et al. Effect of an internet- and app-based stress intervention compared to online psychoeducation in university students with depressive symptoms: Results of a randomized controlled trial. *Internet Interv.* 2021;24. doi:10.1016/j.invent.2021.100374
125. Hassiotis A, Serfaty M, Azam K, et al. Manualised Individual Cognitive Behavioural Therapy for mood disorders in people with mild to moderate intellectual disability: A feasibility randomised controlled trial. *J Affect Disord.* 2013;151(1):186-195. doi:10.1016/j.jad.2013.05.076
126. Hautzinger M, Welz S. Kognitive Verhaltenstherapie bei Depressionen im Alter: Ergebnisse einer kontrollierten Vergleichsstudie unter ambulanten Bedingungen an Depressionen mittleren Schweregrads. = Cognitive behavioral therapy for depressed older outpatients--A controlled, randomized trial. *Z Für Gerontol Geriatr.* 2004;37(6):427-435. doi:10.1007/s00391-004-0262-x
127. Hayman PM, Cope CS. Effects of assertion training on depression. *J Clin Psychol.* 1980;36(2):534-543. doi:10.1002/jclp.6120360226
128. He HL, Zhang M, Gu CZ, et al. Effect of Cognitive Behavioral Therapy on Improving the Cognitive Function in Major and Minor Depression. *J Nerv Ment Dis.* 2019;207(4):232-238. doi:10.1097/NMD.0000000000000954
129. Heckman TG, Sikkema KJ, Hansen N, et al. A randomized clinical trial of a coping improvement group intervention for HIV-infected older adults. *J Behav Med.* 2011;34(2):102-111. doi:10.1007/s10865-010-9292-6
130. Heckman TG, Heckman BD, Anderson T, et al. Supportive-expressive and coping group teletherapies for HIV-infected older adults: a randomized clinical trial. *AIDS Behav.* 2013;17(9):3034-3044. doi:10.1007/s10461-013-0441-0
131. Heckman TG, Heckman BD, Anderson T, et al. Tele-interpersonal psychotherapy acutely reduces depressive symptoms in depressed HIV-infected rural persons: A randomized clinical trial. *Behav Med.* 2017;43(4):285-295. doi:10.1080/08964289.2016.1160025
132. Hegerl U, Hautzinger M, Mergl R, et al. Effects of pharmacotherapy and psychotherapy in depressed primary-care patients: a randomized, controlled trial including a patients' choice arm. *Int J Neuropsychopharmacol.* 2010;13(1):31-44. doi:10.1017/S1461145709000224
133. Hemanny C, Carvalho C, Maia N, et al. Efficacy of trial-based cognitive therapy, behavioral activation and treatment as usual in the treatment of major depressive disorder: Preliminary findings from a randomized clinical trial. *CNS Spectr.* 2019;25(4):535-544. doi:10.1017/S1092852919001457
134. Hermanns N, Schmitt A, Gahr A, et al. The effect of a Diabetes-Specific Cognitive Behavioral Treatment Program (DIAMOS) for patients with diabetes and subclinical depression: results of a randomized controlled trial. *Diabetes Care.* 2015;38(4):551-560. doi:10.2337/dc14-1416
135. Herrmann-Lingen C, Beutel ME, Bosbach A, et al. A stepwise psychotherapy intervention for reducing risk in coronary artery disease (SPIRR-CAD): Results of an observer-blinded, multicenter, randomized trial in depressed patients with coronary artery disease. *Psychosom Med.* 2016;78(6):704-715. doi:10.1097/PSY.0000000000000332

136. Hoifodt RS, Lillevoll KR, Griffiths KM, et al. The clinical effectiveness of web-based cognitive behavioral therapy with face-to-face therapist support for depressed primary care patients: randomized controlled trial. *J Med Internet Res*. 2013;15(8):e153. doi:10.2196/jmir.2714
137. Holden JM, Sagovsky R, Cox JL. Counselling in a general practice setting: Controlled study of health visitor intervention in treatment of postnatal depression. *Br Med J*. 1989;298(6668):223-226. doi:10.1136/bmj.298.6668.223
138. Honey KL, Bennett P, Morgan M. A brief psycho-educational group intervention for postnatal depression. *Br J Clin Psychol*. 2002;41(4):405-409. doi:10.1348/014466502760387515
139. Horrell L, Goldsmith KA, Tylee AT, et al. One-day cognitive-behavioural therapy self-confidence workshops for people with depression: Randomised controlled trial. *Br J Psychiatry*. 2014;204(3):222-233. doi:10.1192/bjp.bp.112.121855
140. Hou Y, Hu P, Zhang Y, et al. Cognitive behavioral therapy in combination with systemic family therapy improves mild to moderate postpartum depression. *Rev Bras Psiquiatr*. 2014;36(1):47-52. doi:10.1590/1516-4446-2013-1170
141. Hsiao FH, Lai YM, Chen YT, et al. Efficacy of psychotherapy on diurnal cortisol patterns and suicidal ideation in adjustment disorder with depressed mood. *Gen Hosp Psychiatry*. 2014;36(2):214-219. doi:10.1016/j.genhosppsych.2013.10.019
142. Huang CY, Lai HL, Chen CI, et al. Effects of motivational enhancement therapy plus cognitive behaviour therapy on depressive symptoms and health-related quality of life in adults with type II diabetes mellitus: A randomised controlled trial. *Qual Life Res Int J Qual Life Asp Treat Care Rehabil*. 2016;25(5):1275-1283. doi:10.1007/s11136-015-1165-6
143. Hum KM, Chan CJ, Gane J, Conway L, McAndrews MP, Smith ML. Do distance-delivery group interventions improve depression in people with epilepsy? *Epilepsy Behav*. 2019;98(Pt A):153-160. doi:10.1016/j.yebeh.2019.06.037
144. Hummel J, Weisbrod C, Boesch L, et al. AIDE—Acute Illness and Depression in Elderly Patients. Cognitive Behavioral Group Psychotherapy in Geriatric Patients With Comorbid Depression: A Randomized, Controlled Trial. *J Am Med Dir Assoc*. 2017;18(4):341-349. doi:10.1016/j.jamda.2016.10.009
145. Hunter SB, Watkins KE, Hepner KA, et al. Treating depression and substance use: a randomized controlled trial. *J Subst Abuse Treat*. 2012;43(2):137-151. doi:10.1016/j.jsat.2011.12.004
146. Husain N, Zulqernain F, Carter LA, et al. Treatment of maternal depression in urban slums of Karachi, Pakistan: a randomized controlled trial (RCT) of an integrated maternal psychological and early child development intervention. *Asian J Psychiatry*. 2017;29:63-70. doi:10.1016/j.ajp.2017.03.010
147. Husain N, Kiran T, Fatima B, et al. An integrated parenting intervention for maternal depression and child development in a low-resource setting: Cluster randomized controlled trial. *Depress Anxiety*. 2021;38(9):925-939. doi:10.1002/da.23169
148. Husain N, Kiran T, Shah S, et al. Efficacy of learning through play plus intervention to reduce maternal depression in women with malnourished children: A randomized controlled trial from Pakistan(☆). *J Affect Disord*. 2021;278:78-84. doi:10.1016/j.jad.2020.09.001

149. Jalali F, Hasani A, Hashemi SF, Kimiaei SA, Babaei A. Cognitive Group Therapy Based on Schema-Focused Approach for Reducing Depression in Prisoners Living With HIV. *Int J Offender Ther Comp Criminol*. 2019;63(2):276-288. doi:10.1177/0306624X18784185
150. Jamison C, Scogin F. The outcome of cognitive bibliotherapy with depressed adults. *J Consult Clin Psychol*. 1995;63(4):644-650. doi:10.1037//0022-006x.63.4.644
151. Jarrett RB, Schaffer M, McIntire D, Witt-Browder A, Kraft D, Risser RC. Treatment of atypical depression with cognitive therapy or phenelzine: a double-blind, placebo-controlled trial. *Arch Gen Psychiatry*. 1999;56(5):431-437. doi:10.1001/archpsyc.56.5.431
152. Jelinek L, Hauschildt M, Wittekind C, Schneider B, Kriston L, Moritz S. Efficacy of metacognitive training for depression: A randomized controlled trial. *Psychother Psychosom*. 2016;85(4):231-234. doi:10.1159/000443699
153. Jesse DE, Gaynes BN, Feldhousen EB, Newton ER, Bunch S, Hollon SD. Performance of a Culturally Tailored Cognitive-Behavioral Intervention Integrated in a Public Health Setting to Reduce Risk of Antepartum Depression: A Randomized Controlled Trial. *J Midwifery Womens Health*. 2015;60(5):578-592. doi:10.1111/jmwh.12308
154. Jiang L, Wang ZZ, Qiu LR, Wan GB, Lin Y, Wei Z. Psychological intervention for postpartum depression. *J Huazhong Univ Sci Technol Med Sci*. 2014;34(3):437-442. doi:10.1007/s11596-014-1297-x
155. Johansson R, Ekbladh S, Hebert A, et al. Psychodynamic guided self-help for adult depression through the internet: a randomised controlled trial. *PloS One*. 2012;7(5):e38021. doi:10.1371/journal.pone.0038021
156. Johansson R, Sjöberg E, Sjögren M, et al. Tailored vs. standardized internet-based cognitive behavior therapy for depression and comorbid symptoms: a randomized controlled trial. *PloS One*. 2012;7(5):e36905. doi:10.1371/journal.pone.0036905
157. Johansson O, Bjärehed J, Andersson G, Carlbring P, Lundh LG. Effectiveness of guided internet-delivered cognitive behavior therapy for depression in routine psychiatry: A randomized controlled trial. *Internet Interv*. 2019;17:100247. doi:10.1016/j.invent.2019.100247
158. Johnson JE, Zlotnick C. Pilot study of treatment for major depression among women prisoners with substance use disorder. *J Psychiatr Res*. 2012;46(9):1174-1183. doi:10.1016/j.jpsychores.2012.05.007
159. Johnson JE, Stout RL, Miller TR, et al. Randomized cost-effectiveness trial of group interpersonal psychotherapy (IPT) for prisoners with major depression. *J Consult Clin Psychol*. 2019;87(4):392-406. doi:10.1037/ccp0000379
160. Joling KJ, Hout HP, van't Veer-Tazelaar PJ, et al. How effective is bibliotherapy for very old adults with subthreshold depression? A randomized controlled trial. *Am J Geriatr Psychiatry*. 2011;19(3):256-265. doi:10.1097/JGP.0b013e3181ec8859
161. Jordans MJD, Luitel NP, Garman E, et al. Effectiveness of psychological treatments for depression and alcohol use disorder delivered by community-based counsellors: Two pragmatic randomised controlled trials within primary healthcare in Nepal. *Br J Psychiatry*. 2019;215(2):485-493. doi:10.1192/bjp.2018.300
162. Kamga H, McCusker J, Yaffe M, et al. Self-care tools to treat depressive symptoms in patients with age-related eye disease: a randomized controlled clinical trial. *Clin Experiment Ophthalmol*. 2017;45(4):371-378. doi:10.1111/ceo.12890

163. Kanter JW, Santiago-Rivera AL, Santos MM, et al. A Randomized Hybrid Efficacy and Effectiveness Trial of Behavioral Activation for Latinos With Depression. *Behav Ther.* 2015;46(2):177-192. doi:10.1016/j.beth.2014.09.011
164. Keeley RD, Brody DS, Engel M, et al. Motivational interviewing improves depression outcome in primary care: A cluster randomized trial. *J Consult Clin Psychol.* 2016;84(11):993-1007. doi:10.1037/ccp0000124
165. Kelly JA, Murphy DA, Bahr GR, et al. Outcome of cognitive-behavioral and support group brief therapies for depressed, HIV-infected persons. *Am J Psychiatry.* 1993;150(11):1679-1686. doi:10.1176/ajp.150.11.1679
166. Kenter RMF, Cuijpers P, Beekman A, van Straten A. Effectiveness of a Web-based guided self-help intervention for outpatients with a depressive disorder: Short-term results from a randomized controlled trial. *J Med Internet Res.* 2016;18(3):e80. doi:10.2196/jmir.4861
167. Kessler D, Lewis G, Kaur S, et al. Therapist-delivered Internet psychotherapy for depression in primary care: a randomised controlled trial. *Lancet.* 2009;374(9690):628-634. doi:10.1016/s0140-6736(09)61257-5
168. Kim YH, Choi KS, Han K, Kim HW. A psychological intervention programme for patients with breast cancer under chemotherapy and at a high risk of depression: a randomised clinical trial. *J Clin Nurs.* 2018;27(3-4):572-581. doi:10.1111/jocn.13910
169. King M, Sibbald B, Ward E, et al. Randomised controlled trial of non-directive counselling, cognitive-behaviour therapy and usual general practitioner care in the management of depression as well as mixed anxiety and depression in primary care. *Health Technol Assess.* 2000;4(19):1-83. doi:10.3310/hta4190
170. Kivi M, Eriksson MCM, Hange D, et al. Internet-based therapy for mild to moderate depression in Swedish primary care: Short term results from the PRIM-NET randomized controlled trial. *Cogn Behav Ther.* 2014;43(4):289-298. doi:10.1080/16506073.2014.921834
171. Kleiboer A, Donker T, Seekles W, van Straten A, Riper H, Cuijpers P. A randomized controlled trial on the role of support in Internet-based problem solving therapy for depression and anxiety. *Behav Res Ther.* 2015;72:63-71. doi:10.1016/j.brat.2015.06.013
172. Korrelboom K, Maarsingh M, Huijbrechts I. Competitive memory training (COMET) for treating low self-esteem in patients with depressive disorders: a randomized clinical trial. *Depress Anxiety.* 2012;29(2):102-110. doi:10.1002/da.20921
173. Korte J, Bohlmeijer ET, Cappeliez P, Smit F, Westerhof GJ. Life review therapy for older adults with moderate depressive symptomatology: a pragmatic randomized controlled trial. *Psychol Med.* 2012;42(6):1163-1173. doi:10.1017/S0033291711002042
174. Krämer LV, Grünzig SD, Baumeister H, Ebert DD, Bengel J. Effectiveness of a Guided Web-Based Intervention to Reduce Depressive Symptoms before Outpatient Psychotherapy: A Pragmatic Randomized Controlled Trial. *Psychother Psychosom.* 2021;90(4):233-242. doi:10.1159/000515625
175. Laidlaw K, Davidson K, Toner H, et al. A randomised controlled trial of cognitive behaviour therapy vs treatment as usual in the treatment of mild to moderate late life depression. *Int J Geriatr Psychiatry.* 2008;23(8):843-850. doi:10.1002/gps.1993



176. Lamers F, Jonkers CC, Bosma H, et al. A minimal psychological intervention in chronically ill elderly patients with depression: a randomized trial. *Psychother Psychosom.* 2010;79(4):217-226. doi:10.1159/000313690
177. Lamers SMA, Bohlmeijer ET, Korte J, Westerhof GJ. The efficacy of life-review as online-guided self-help for adults: A randomized trial. *J Gerontol B Psychol Sci Soc Sci.* 2015;70B(1):24-34. doi:10.1093/geronb/gbu030
178. Landreville P, Bissonnette L. Effects of cognitive bibliotherapy for depressed older adults with a disability. *Clin Gerontol.* 1997;17(4):35-55. doi:10.1300/J018v17n04\_05
179. Lappalainen P, Langrial S, Oinas-Kukkonen H, Tolvanen A, Lappalainen R. Web-based acceptance and commitment therapy for depressive symptoms with minimal support: A randomized controlled trial. *Behav Modif.* 2015;39(6):805-834. doi:10.1177/0145445515598142
180. Larcombe NA, Wilson PH. An evaluation of cognitive-behaviour therapy for depression in patients with multiple sclerosis. *Br J Psychiatry.* 1984;145:366-371. doi:10.1192/bjp.145.4.366
181. Lee E, Han Y, Cha YJ, et al. Community-Based Multi-Site Randomized Controlled Trial of Behavioral Activation for Patients with Depressive Disorders. *Community Ment Health J.* Published online 2021. doi:10.1007/s10597-021-00828-3
182. Lemma A, Fonagy P. Feasibility study of a psychodynamic online group intervention for depression. *Psychoanal Psychol.* 2013;30(3):367-380. doi:10.1037/a0033239
183. Lenze S, Potts M. Brief Interpersonal Psychotherapy for depression during pregnancy in a low-income population: a randomized controlled trial. *J Affect Disord.* 2017;210:151-157. doi:10.1016/j.jad.2016.12.029
184. Lenze SN, Potts MA, Rodgers J, Luby J. Lessons learned from a pilot randomized controlled trial of dyadic interpersonal psychotherapy for perinatal depression in a low-income population. *J Affect Disord.* 2020;271:286-292. doi:10.1016/j.jad.2020.03.084
185. Lerner D, Adler DA, Rogers WH, et al. A randomized clinical trial of a telephone depression intervention to reduce employee presenteeism and absenteeism. *Psychiatr Serv.* 2015;66(6):570-577. doi:10.1176/appi.ps.201400350
186. Leung SS, Lee AM, Chiang VC, Lam SK, Kuen YW, Wong DF. Culturally sensitive, preventive antenatal group cognitive-behavioural therapy for Chinese women with depression. *Int J Nurs Pr.* 2013;19 Suppl 1:28-37. doi:10.1111/ijn.12021
187. Leung SS, Lee AM, Wong DF, et al. A brief group intervention using a cognitive-behavioural approach to reduce postnatal depressive symptoms: a randomised controlled trial. *Hong Kong Med J.* 2016;22 Suppl 2:S4-8.
188. Lexis MA, Jansen NW, Huibers MJ, et al. Prevention of long-term sickness absence and major depression in high-risk employees: a randomised controlled trial. *Occup Environ Med.* 2011;68(6):400-407. doi:10.1136/oem.2010.057877
189. Liang L, Feng L, Zheng X, Wu Y, Zhang C, Li J. Effect of dialectical behavior group therapy on the anxiety and depression of medical students under the normalization of epidemic prevention and control for the COVID-19 epidemic: a randomized study. *Ann Palliat Med.* 2021;10(10):10591-10599. doi:10.21037/apm-21-2466

190. Linde JA, Simon GE, Ludman EJ, et al. A randomized controlled trial of behavioral weight loss treatment versus combined weight loss/depression treatment among women with comorbid obesity and depression. *Ann Behav Med.* 2011;41(1):119-130. doi:10.1007/s12160-010-9232-2
191. Liu ETH, Chen WL, Li YH, Wang CH, Mok TJ, Huang HS. Exploring the efficacy of cognitive bibliotherapy and a potential mechanism of change in the treatment of depressive symptoms among the Chinese: A randomized controlled trial. *Cogn Ther Res.* 2009;33(5):449-461. doi:10.1007/s10608-008-9228-4
192. Liu H, Yang Y. Effects of a psychological nursing intervention on prevention of anxiety and depression in the postpartum period: a randomized controlled trial. *Ann Gen Psychiatry.* 2021;20(1). doi:10.1186/s12991-020-00320-4
193. Lloyd-Williams M, Shiels C, Ellis J, et al. Pilot randomised controlled trial of focused narrative intervention for moderate to severe depression in palliative care patients: DISCERN trial. *Palliat Med.* 2018;32(1):206-215. doi:10.1177/0269216317711322
194. Lök N, Bademli K, Selçuk-Tosun A. The effect of reminiscence therapy on cognitive functions, depression, and quality of life in Alzheimer patients: randomized controlled trial. *Int J Geriatr Psychiatry.* 2019;34(1):47-53. doi:10.1002/gps.4980
195. Losada A, Márquez-González M, Romero-Moreno R, et al. Cognitive-behavioral therapy (CBT) versus acceptance and commitment therapy (ACT) for dementia family caregivers with significant depressive symptoms: Results of a randomized clinical trial. *J Consult Clin Psychol.* 2015;83(4):760-772. doi:10.1037/ccp0000028
196. Lovell K, Bower P, Richards D, et al. Developing guided self-help for depression using the medical research council complex interventions framework: A description of the modelling phase and results of an exploratory randomised controlled trial. *BMC Psychiatry.* 2008;8:91. doi:10.1186/1471-244X-8-91
197. Lund C, Schneider M, Garman EC, et al. Task-sharing of psychological treatment for antenatal depression in Khayelitsha, South Africa: Effects on antenatal and postnatal outcomes in an individual randomised controlled trial. *Behav Res.* 2019;130:103466. doi:10.1016/j.brat.2019.103466
198. Lundgren J, Dahlstrom Ö, Andersson G, Jaarsma T, Karner Kohlner A, Johansson P. The effect of guided web-based cognitive behavioral therapy on patients with depressive symptoms and heart failure-a randomized controlled trial. *Eur J Heart Fail.* 2016;18(8):401. doi:10.2196/jmir.5556
199. Lustman PJ, Griffith LS, Freedland KE, Kissel SS, Clouse RE. Cognitive behavior therapy for depression in type 2 diabetes mellitus. A randomized, controlled trial. *Ann Intern Med.* 1998;129(8):613-621. doi:10.7326/0003-4819-129-8-199810150-00005
200. Lynch DJ, Tamburrino MB, Nagel R. Telephone counseling for patients with minor depression: preliminary findings in a family practice setting. *J Fam Pr.* 1997;44(3):293-298.
201. Lynch D, Tamburrino M, Nagel R, Smith MK. Telephone-based treatment for family practice patients with mild depression. *Psychol Rep.* 2004;94(3 Pt 1):785-792. doi:10.2466/pr0.94.3.785-792
202. Lynch TR, Hempel RJ, Whalley B, et al. Refractory depression - mechanisms and efficacy of radically open dialectical behaviour therapy (RefrAMED): findings of a randomised trial on benefits and harms. *Br J Psychiatry J Ment Sci.* 2019;216(4):1-9. doi:10.1192/bjp.2019.53

203. MacLean S, Corsi DJ, Litchfield S, et al. Coach-facilitated web-based therapy compared with information about web-based resources in patients referred to secondary mental health care for depression: Randomized controlled trial. *J Med Internet Res*. 2020;22(6). doi:10.2196/15001
204. MacPherson H, Richmond S, Bland M, et al. Acupuncture and counselling for depression in primary care: a randomised controlled trial. *PLoS Med*. 2013;10(9):e1001518. doi:10.1371/journal.pmed.1001518
205. Mahmoodi M, Bakhtiyari M, Masjedi Arani A, Mohammadi A, Saberi Isfeedvajani M. The comparison between CBT focused on perfectionism and CBT focused on emotion regulation for individuals with depression and anxiety disorders and dysfunctional perfectionism: A randomized controlled trial. *Behav Cogn Psychother*. 2021;49(4):454-471. doi:10.1017/S1352465820000909
206. Maina G, Forner F, Bogetto F. Randomized controlled trial comparing brief dynamic and supportive therapy with waiting list condition in minor depressive disorders. *Psychother Psychosom*. 2005;74(1):43-50. doi:10.1159/000082026
207. Malouff JM, Lanyon RI, Schutte NS. Effectiveness of a brief group RET treatment for divorce-related dysphoria. *J Ration-Emotive Cogn-Behav Ther*. 1988;6(3):162-171. doi:10.1007/BF01064077
208. Martin PR, Aiello R, Gilson K, Meadows G, Milgrom J, Reece J. Cognitive behavior therapy for comorbid migraine and/or tension-type headache and major depressive disorder: An exploratory randomized controlled trial. *Behav Res Ther*. 2015;73:8-18. doi:10.1016/j.brat.2015.07.005
209. Matsuzaka C, Wainberg M, Norcini PA, et al. Task shifting interpersonal counseling for depression: a pragmatic randomized controlled trial in primary care. *BMC Psychiatry*. 2017;17(1) (no pagination). doi:10.1186/s12888-017-1379-y
210. McClay CA, Collins K, Matthews L, et al. A community-based pilot randomised controlled study of life skills classes for individuals with low mood and depression. *BMC Psychiatry*. 2015;15(1):17. doi:10.1186/s12888-015-0384-2
211. McCusker J, Jones JM, Li M, et al. CanDirect: Effectiveness of a Telephone-Supported Depression Self-Care Intervention for Cancer Survivors. *J Clin Oncol*. 2021;39(10):1150-1161. doi:10.1200/jco.20.01802
212. McIndoo CC, File AA, Preddy T, Clark CG, Hopko DR. Mindfulness-based therapy and behavioral activation: A randomized controlled trial with depressed college students. *Behav Res Ther*. 2016;77:118-128. doi:10.1016/j.brat.2015.12.012
213. McKee MD, Zayas LH, Fletcher J, Boyd RC, Nam SH. Results of an Intervention to Reduce Perinatal Depression Among Low-Income Minority Women in Community Primary Care. *J Soc Serv Res*. 2006;32(4):63-81. doi:10.1300/J079v32n04\_04
214. Mennen FE, Palmer Molina A, Monro WL, Duan L, Stuart S, Sosna T. Effectiveness of an Interpersonal Psychotherapy (IPT) Group Depression Treatment for Head Start Mothers: A Cluster-Randomized Controlled Trial. *J Affect Disord*. 2021;280(Pt B):39-48. doi:10.1016/j.jad.2020.11.074
215. Michalak J, Schultze M, Heidenreich T, Schramm E. A randomized controlled trial on the efficacy of mindfulness-based cognitive therapy and a group version of cognitive behavioral analysis system of psychotherapy for chronically depressed patients. *J Consult Clin Psychol*. 2015;83(5):951-963. doi:10.1037/ccp0000042

216. Milgrom J, Negri LM, Gemmill AW, McNeil M, Martin PR. A randomized controlled trial of psychological interventions for postnatal depression. *Br J Clin Psychol*. 2005;44(Pt 4):529-542. doi:10.1348/014466505x34200
217. Milgrom J, Holt CJ, Gemmill AW, et al. Treating postnatal depressive symptoms in primary care: a randomised controlled trial of GP management, with and without adjunctive counselling. *BMC Psychiatry*. 2011;11:95. doi:10.1186/1471-244x-11-95
218. Milgrom J, Holt C, Holt CJ, Ross J, Ericksen J, Gemmill AW. Feasibility study and pilot randomised trial of an antenatal depression treatment with infant follow-up. *Arch Womens Ment Health*. 2015;18(5):717-730. doi:10.1007/s00737-015-0512-5
219. Milgrom J, Danaher BG, Gemmill AW, et al. Internet Cognitive Behavioral Therapy for Women With Postnatal Depression: A Randomized Controlled Trial of MumMoodBooster. *J Med Internet Res*. 2016;18(3):e54. doi:10.2196/jmir.4993
220. Milgrom J, Danaher BG, Gemmill AW, et al. Internet cognitive behavioural therapy for women with postnatal depression: A randomized controlled trial of MumMoodBooster. *Arch Womens Ment Health*. 2020;23(2):293-294. doi:10.1007/s00737-019-00953-9
221. Milgrom J, Danaher BG, Seeley JR, et al. Internet and Face-to-face Cognitive Behavioral Therapy for Postnatal Depression Compared With Treatment as Usual: Randomized Controlled Trial of MumMoodBooster. *J Med Internet Res*. 2021;23(12):e17185. doi:10.2196/17185
222. Miller L, Weissman M. Interpersonal psychotherapy delivered over the telephone to recurrent depressives. A pilot study. *Depress Anxiety*. 2002;16(3):114-117. doi:10.1002/da.10047
223. Miranda J, Chung JY, Green BL, et al. Treating depression in predominantly low-income young minority women: a randomized controlled trial. *Jama*. 2003;290(1):57-65. doi:10.1001/jama.290.1.57
224. Mohr DC, Likosky W, Bertagnolli A, et al. Telephone-administered cognitive-behavioral therapy for the treatment of depressive symptoms in multiple sclerosis. *J Consult Clin Psychol*. 2000;68(2):356-361. doi:10.1037//0022-006x.68.2.356
225. Mohr DC, Carmody T, Erickson L, Jin L, Leader J. Telephone-administered cognitive behavioral therapy for veterans served by community-based outpatient clinics. *J Consult Clin Psychol*. 2011;79(2):261-265. doi:10.1037/a0022395
226. Mohr DC, Duffecy J, Ho J, et al. A randomized controlled trial evaluating a manualized TeleCoaching protocol for improving adherence to a web-based intervention for the treatment of depression. *PLoS One*. 2013;8(8):e70086. doi:10.1371/journal.pone.0070086
227. Moldovan R, Cobeau O, David D. Cognitive bibliotherapy for mild depressive symptomatology: randomized clinical trial of efficacy and mechanisms of change. *Clin Psychol Psychother*. 2013;20(6):482-493. doi:10.1002/cpp.1814
228. Montero-Marín J, Araya R, Pérez-Yus MC, et al. An internet-based intervention for depression in primary Care in Spain: a randomized controlled trial. *J Med Internet Res*. 2016;18(8):e231. doi:10.2196/jmir.5695
229. Moon JR, Huh J, Song J, et al. The effects of rational emotive behavior therapy for depressive symptoms in adults with congenital heart disease. *Heart Lung*. 2021;50(6):906-913. doi:10.1016/j.hrtlng.2021.07.011

230. Mossey JM, Knott KA, Higgins M, Talerico K. Effectiveness of a psychosocial intervention, interpersonal counseling, for subdysthymic depression in medically ill elderly. *J Gerontol Biol Sci Med Sci*. 1996;51(4):M172-8. doi:10.1093/gerona/51a.4.m172
231. Mukhtar F, Oei TP, Yaacob M. Effectiveness of group cognitive behaviour therapy augmentation in reducing negative cognitions in the treatment of depression in Malaysia. *ASEAN J Psychiatry*. 2011;12(1):50-65.
232. Mulcahy R, Reay RE, Wilkinson RB, Owen C. A randomised control trial for the effectiveness of group Interpersonal Psychotherapy for postnatal depression. *Arch Womens Ment Health*. 2010;13(2):125-139. doi:10.1007/s00737-009-0101-6
233. Musa ZA, Soh KL, Mukhtar F, Soh KY, Oladele TO, Soh KG. Effectiveness of mindfulness-based cognitive therapy among depressed individuals with disabilities in Nigeria: A randomized controlled trial. *Psychiatry Res*. 2021;296:113680. doi:10.1016/j.psychres.2020.113680
234. Mynors-Wallis L, Gath D, Lloyd-Thomas A, Tomlinson D. Randomised controlled trial comparing problem solving treatment with amitriptyline and placebo for major depression in primary care. *Bmj*. 1995;310(6977):441-445. doi:10.1136/bmj.310.6977.441
235. Naeem F, Sarhandi I, Gul M, Khalid M, Aslam M, Anbrin A. A multicentre randomised controlled trial of a carer supervised culturally adapted cbt (cacbt) based self-help for depression in pakistan. *J Affect Disord*. 2013;156:224-227. doi:10.1016/j.jad.2013.10.051
236. Naeem F, Gul M, Irfan M, et al. Brief Culturally adapted CBT (CaCBT) for depression: A randomized controlled trial from Pakistan. *J Affect Disord*. 2015;177:101-107. doi:10.1016/j.jad.2015.02.012
237. Nakagawa A, Mitsuda D, Sado M, et al. Effectiveness of supplementary cognitive-behavioral therapy for pharmacotherapy-resistant depression: A randomized controlled trial. *J Clin Psychiatry*. 2017;78(8):1126-1135. doi:10.4088/JCP.15m10511
238. Nakimuli-Mpungu E, Wamala K, Okello J, et al. Group support psychotherapy for depression treatment in people with HIV/AIDS in northern Uganda: a single-centre randomised controlled trial. *Lancet HIV*. 2015;2(5):e190-9. doi:10.1016/s2352-3018(15)00041-7
239. Nakimuli-Mpungu E, Musisi S, Wamala K, et al. Effectiveness and cost-effectiveness of group support psychotherapy delivered by trained lay health workers for depression treatment among people with HIV in Uganda: a cluster-randomised trial. *Lancet Glob Health*. 2020;8(3):e387-e398. doi:10.1016/s2214-109x(19)30548-0
240. Nasrin F, Rimes K, Reinecke A, Rinck M, Barnhofer T. Effects of Brief Behavioural Activation on Approach and Avoidance Tendencies in Acute Depression: preliminary Findings. *Behav Cogn Psychother*. 2017;45(1):58-72. doi:10.1017/S1352465816000394
241. Neugebauer R, Kline J, Markowitz JC, et al. Pilot randomized controlled trial of interpersonal counseling for subsyndromal depression following miscarriage. *J Clin Psychiatry*. 2006;67(8):1299-1304. doi:10.4088/jcp.v67n0819
242. Newby JM, Lang T, Werner-Seidler A, Holmes E, Moulds ML. Alleviating distressing intrusive memories in depression: A comparison between computerised cognitive bias modification and cognitive behavioural education. *Behav Res Ther*. 2014;56:60-67. doi:10.1016/j.brat.2014.03.001

243. Newby J, Robins L, Wilhelm K, et al. Web-Based Cognitive Behavior Therapy for Depression in People With Diabetes Mellitus: a Randomized Controlled Trial. *J Med Internet Res*. 2017;19(5):e157. doi:10.2196/jmir.7274
244. Nezu AM. Efficacy of a social problem-solving therapy approach for unipolar depression. *J Consult Clin Psychol*. 1986;54(2):196-202. doi:10.1037//0022-006x.54.2.196
245. Nezu AM, Perri MG. Social problem-solving therapy for unipolar depression: an initial dismantling investigation. *J Consult Clin Psychol*. 1989;57(3):408-413. doi:10.1037/0022-006X.57.3.408
246. Ng SE, Tien A, Thayala JN, Ho RC, Chan MF. The effect of life story review on depression of older community-dwelling Chinese adults in Singapore: a preliminary result. *Int J Geriatr Psychiatry*. 2013;28(3):328-330. doi:10.1002/gps.3851
247. Ngai FW, Wong PWC, Leung KY, Chau PH, Chung KF. The Effect of Telephone-Based Cognitive-Behavioral Therapy on Postnatal Depression: A Randomized Controlled Trial. *Psychother Psychosom*. 2015;84(5):294-303. doi:10.1159/000430449
248. Niedermoser DW, Kalak N, Kiyhankhadiv A, et al. Workplace-Related Interpersonal Group Psychotherapy to Improve Life at Work in Individuals With Major Depressive Disorders: a Randomized Interventional Pilot Study. *Front Psychiatry*. 2020;11. doi:10.3389/fpsy.2020.00168
249. Nobis S, Lehr D, Ebert DD, et al. Efficacy of a Web-Based Intervention With Mobile Phone Support in Treating Depressive Symptoms in Adults With Type 1 and Type 2 Diabetes: A Randomized Controlled Trial. *Diabetes Care*. 2015;38(5):776-783. doi:10.2337/dc14-1728
250. Nollett CL, Bray N, Bunce C, et al. Depression in visual impairment trial (Depvit): A randomized clinical trial of depression treatments in people with low vision. *Invest Ophthalmol Vis Sci*. 2016;57(10):4247-4254. doi:10.1167/iovs.16-19345
251. Northwood AK, Vukovich MM, Beckman A, et al. Intensive psychotherapy and case management for Karen refugees with major depression in primary care: a pragmatic randomized control trial. *BMC Fam Pr*. 2020;21(1):17. doi:10.1186/s12875-020-1090-9
252. Nyström M, Stenling A, Sjöström E, et al. Behavioral activation versus physical activity via the internet: a randomized controlled trial. *J Affect Disord*. 2017;215:85-93. doi:10.1016/j.jad.2017.03.018
253. O'Hara MW, Stuart S, Gorman LL, Wenzel A. Efficacy of interpersonal psychotherapy for postpartum depression. *Arch Gen Psychiatry*. 2000;57(11):1039-1045. doi:10.1001/archpsyc.57.11.1039
254. O'Mahen H, Himle JA, Fedock G, Henshaw E, Flynn H. A pilot randomized controlled trial of cognitive behavioral therapy for perinatal depression adapted for women with low incomes. *Depress Anxiety*. 2013;30(7):679-687. doi:10.1002/da.22050
255. O'Neil A, Taylor B Fau - Sanderson K, Sanderson K Fau - Cyril S, et al. Efficacy and feasibility of a tele-health intervention for acute coronary syndrome patients with depression: results of the "MoodCare" randomized controlled trial. *Ann Behav Med*. 2014;48(1532-4796 (Electronic)):163-174. doi:10.1007/s12160-014-9592-0
256. Oehler C, Görge F, Rogalla M, Rummel-Kluge C, Hegerl U. Efficacy of a Guided Web-Based Self-Management Intervention for Depression or Dysthymia: Randomized Controlled Trial

- With a 12-Month Follow-Up Using an Active Control Condition. *J Med Internet Res.* 2020;22(7):e15361. doi:10.2196/15361
257. Olukolade O, Osinowo H. Efficacy of Cognitive Rehabilitation Therapy on Poststroke Depression among Survivors of First Stroke Attack in Ibadan, Nigeria. *Behav Neurol.* 2017;2017(no pagination). doi:10.1155/2017/4058124
258. Omid A, Mohammadkhani P, Mohammadi A, Zargar F. Comparing mindfulness based cognitive therapy and traditional cognitive behavior therapy with treatments as usual on reduction of major depressive disorder symptoms. *Iran Red Crescent Med J.* 2013;15(2):142-146. doi:10.5812/ircmj.8018
259. Onuigbo LN, Eseadi C, Ebifa S, Ugwu UC, Onyishi CN, Oyeoku EK. Effect of rational emotive behavior therapy program on depressive symptoms among university students with blindness in Nigeria. *J Ration-Emotive Cogn-Behav Ther.* 2019;37(1):17-38. doi:10.1007/s10942-018-0297-3
260. Onyechi KCN, Eseadi C, Okere AU, et al. Effects of cognitive behavioral coaching on depressive symptoms in a sample of type 2 diabetic inpatients in Nigeria. *Med U S.* 2016;95(31):e4444. doi:10.1097/MD.0000000000004444
261. Pace TM, Dixon DN. Changes in depressive self-schemata and depressive symptoms following cognitive therapy. *J Couns Psychol.* 1993;40(3):288. doi:10.1037/0022-0167.40.3.288
262. Pagoto S, Schneider KL, Whited MC, et al. Randomized controlled trial of behavioral treatment for comorbid obesity and depression in women: the Be Active Trial. *Int J Obes.* 2013;37(11):1427-1434. doi:10.1038/ijo.2013.25
263. Patel V, Weobong B, Weiss H, et al. The Healthy Activity Program (HAP), a lay counsellor-delivered brief psychological treatment for severe depression, in primary care in India: a randomised controlled trial. *Lancet Lond Engl.* 2017;389(10065):176-185. doi:10.1016/S0140-6736(16)31589-6
264. Pecheur DR, Edwards KJ. A comparison of secular and religious versions of cognitive therapy with depressed Christian college students. *J Psychol Theol.* Published online 1984. doi:10.1177/009164718401200106
265. Peden AR, Hall LA, Rayens MK, Beebe LL. Reducing negative thinking and depressive symptoms in college women. *J Nurs Sch.* 2000;32(2):145-151. doi:10.1111/j.1547-5069.2000.00145.x
266. Penckofer SM, Ferrans C, Mumby P, et al. A psychoeducational intervention (SWEEP) for depressed women with diabetes. *Ann Behav Med.* 2012;44(2):192-206. doi:10.1007/s12160-012-9377-2
267. Perini S, Titov N, Andrews G. Clinician-assisted Internet-based treatment is effective for depression: randomized controlled trial. *Aust N Z J Psychiatry.* 2009;43(6):571-578. doi:10.1080/00048670902873722
268. Petersen I, Hanass Hancock J, Bhana A, Govender K. A group-based counselling intervention for depression comorbid with HIV/AIDS using a task shifting approach in South Africa: a randomized controlled pilot study. *J Affect Disord.* 2014;158:78-84. doi:10.1016/j.jad.2014.02.013

269. Pibernik-Okanovic M, Begic D, Ajdukovic D, Andrijasevic N, Metelko Z. Psychoeducation versus treatment as usual in diabetic patients with subthreshold depression: preliminary results of a randomized controlled trial. *Trials*. 2009;10:78. doi:10.1186/1745-6215-10-78
270. Pibernik-Okanovic M, Hermanns N, Ajdukovic D, et al. Does treatment of subsyndromal depression improve depression-related and diabetes-related outcomes? A randomised controlled comparison of psychoeducation, physical exercise and enhanced treatment as usual. *Trials*. 2015;16:305. doi:10.1186/s13063-015-0833-8
271. Pihlaja S, Lahti J, Lipsanen JO, et al. Scheduled Telephone Support for Internet Cognitive Behavioral Therapy for Depression in Patients at Risk for Dropout: Pragmatic Randomized Controlled Trial. *J Med Internet Res*. 2020;22(7):e15732. doi:10.2196/15732
272. Poleshuck EL, Gamble SA, Bellenger K, et al. Randomized controlled trial of interpersonal psychotherapy versus enhanced treatment as usual for women with co-occurring depression and pelvic pain. *J Psychosom Res*. 2014;77(4):264-272. doi:10.1016/j.jpsychores.2014.07.016
273. Pot AM, Bohlmeijer ET, Onrust S, Melenhorst AS, Veerbeek M, De Vries W. The impact of life review on depression in older adults: A randomized controlled trial. *Int Psychogeriatr*. 2010;22(4):572-581. doi:10.1017/S104161020999175X
274. Pots WTM, Meulenbeek PAM, Veehof MM, Klungers J, Bohlmeijer ET. The efficacy of mindfulness-based cognitive therapy as a public mental health intervention for adults with mild to moderate depressive symptomatology: A randomized controlled trial. *PLoS ONE*. 2014;9(10). doi:10.1371/journal.pone.0109789
275. Pots W, Fledderus M, Meulenbeek P, Klooster P, Schreurs K, Bohlmeijer E. Acceptance and commitment therapy as a web-based intervention for depressive symptoms: randomised controlled trial. *Br J Psychiatry J Ment Sci*. 2016;208(1):69-77. doi:10.1192/bjp.bp.114.146068
276. Power Michael J, Freeman C. A randomized controlled trial of IPT versus CBT in primary care: With some cautionary notes about handling missing values in clinical trials. [References]. *Clin Psychol Psychother*. 2012;19(2):159-169. doi:10.1002/cpp.1781
277. Prendergast J, Austin MP. Early childhood nurse-delivered cognitive behavioural counselling for post-natal depression. *Australas Psychiatry*. 2001;9(3):255-259. doi:10.1046/j.1440-1665.2001.00330.x
278. Preschl B, Maercker A, Wagner B, et al. Life-review therapy with computer supplements for depression in the elderly: a randomized controlled trial. *Aging Ment Health*. 2012;16(8):964-974. doi:10.1080/13607863.2012.702726
279. Propst LR, Ostrom R, Watkins P, Dean T, Mashburn D. Comparative efficacy of religious and nonreligious cognitive-behavioral therapy for the treatment of clinical depression in religious individuals. *J Consult Clin Psychol*. 1992;60(1):94-103. doi:10.1037//0022-006x.60.1.94
280. Psarraki EE, Bacopoulou F, Panagoulas E, et al. The effects of Pythagorean Self-Awareness Intervention on patients with major depressive disorder: A pilot randomized controlled trial. *J Psychiatr Res*. 2021;138:326-334. doi:10.1016/j.jpsychores.2021.03.067
281. Puckering C, McIntosh E, Hickey A, Longford J. Mellow Babies: A group intervention for infants and mothers experiencing postnatal depression. *Couns Psychol Rev*. 2010;25(1):28-38.
282. Pugh NE, Hadjistavropoulos HD, Dirkse D. A Randomised Controlled Trial of Therapist-Assisted, Internet-Delivered Cognitive Behavior Therapy for Women with Maternal Depression. *PLoS One*. 2016;11(3):e0149186. doi:10.1371/journal.pone.0149186



283. Qiu J, Chen W, Gao X, et al. A randomized controlled trial of group cognitive behavioral therapy for Chinese breast cancer patients with major depression. *J Psychosom Obstet Gynaecol.* 2013;34(2):60-67. doi:10.3109/0167482x.2013.766791
284. Raevuori A, Vahlberg T, Korhonen T, Hilgert O, Aittakumpu-Hyden R, Forman-Hoffman V. A therapist-guided smartphone app for major depression in young adults: A randomized clinical trial. *J Affect Disord.* 2021;286:228-238. doi:10.1016/j.jad.2021.02.007
285. Rahman A, Malik A, Sikander S, Roberts C, Creed F. Cognitive behaviour therapy-based intervention by community health workers for mothers with depression and their infants in rural Pakistan: a cluster-randomised controlled trial. *Lancet.* 2008;372(9642):902-909. doi:10.1016/s0140-6736(08)61400-2
286. Ransom D, Heckman TG, Anderson T, Garske J, Holroyd K, Basta T. Telephone-delivered, interpersonal psychotherapy for HIV-infected rural persons with depression: a pilot trial. *Psychiatr Serv.* 2008;59(8):871-877. doi:10.1176/appi.ps.59.8.871
287. Raue PJ, Sirey JA, Dawson A, Berman J, Bruce ML. Lay-delivered behavioral activation for depressed senior center clients: Pilot RCT. *Int J Geriatr Psychiatry.* 2019;34(11):1715-1723. doi:10.1002/gps.5186
288. Raya-Tena A, Fernández-San-Martin MI, Martin-Royo J, et al. Effectiveness of a Psychoeducational Group Intervention Carried Out by Nurses for Patients with Depression and Physical Comorbidity in Primary Care: Randomized Clinical Trial. *Int J Env Res Public Health.* 2021;18(6). doi:10.3390/ijerph18062948
289. Rehm LP, Kornblith SJ, O'Hara MW, Lamparski DM, Romano JM, Volkin JI. An evaluation of major components in a self-control therapy program for depression. *Behav Modif.* 1981;5(4):459-489. doi:10.1177/014544558154002
290. Reins JA, Boß L, Lehr D, Berking M, Ebert DD. The more I got, the less I need? Efficacy of Internet-based guided self-help compared to online psychoeducation for major depressive disorder. *J Of.* 2019;246:695-705. doi:10.1016/j.jad.2018.12.065
291. Richards D, Timulak L, O'Brien E, et al. A randomized controlled trial of an internet-delivered treatment: Its potential as a low-intensity community intervention for adults with symptoms of depression. *Behav Res Ther.* 2015;75:20-31. doi:10.1016/j.brat.2015.10.005
292. Richards SH, Dickens C, Anderson R, et al. Assessing the effectiveness of Enhanced Psychological Care for patients with depressive symptoms attending cardiac rehabilitation compared with treatment as usual (CADENCE): a pilot cluster randomised controlled trial. *Trials.* 2018;19(1):211. doi:10.1186/s13063-018-2576-9
293. Rief W, Bleichhardt G, Dannehl K, Euteneuer F, Wambach K. Comparing the Efficacy of CBASP with Two Versions of CBT for Depression in a Routine Care Center: a Randomized Clinical Trial. *Psychother Psychosom.* 2018;(no pagination)(3):164-178. doi:10.1159/000487893
294. Ritvo P, Knyahnytska Y, Pirbaglou M, et al. Online Mindfulness-Based Cognitive Behavioral Therapy Intervention for Youth With Major Depressive Disorders: Randomized Controlled Trial. *J Med Internet Res.* 2021;23(3):e24380. doi:10.2196/24380
295. Rizvi SJ, Zaretsky A, Schaffer A, Levitt A. Is immediate adjunctive CBT more beneficial than delayed CBT in treating depression?: A Pilot Study. *J Psychiatr Pr.* 2015;21(2):107-113. doi:10.1097/01.pra.0000462603.71983.15

296. Rohan KJ, Roecklein KA, Lindsey KT, et al. A Randomized Controlled Trial of Cognitive-Behavioral Therapy, Light Therapy, and Their Combination for Seasonal Affective Disorder. *J Consult Clin Psychol.* 2007;75(3):489-500. doi:10.1037/0022-006X.75.3.489
297. Rohde P, Stice E, Shaw H, Gau JM. Pilot trial of a dissonance-based cognitive-behavioral group depression prevention with college students. *Behav Res Ther.* 2016;82:21-27. doi:10.1016/j.brat.2016.05.001
298. Rohricht F, Papadopoulos N, Priebe S. An exploratory randomized controlled trial of body psychotherapy for patients with chronic depression. *J Affect Disord.* 2013;151(1):85-91. doi:10.1016/j.jad.2013.05.056
299. Ross M, Scott M. An evaluation of the effectiveness of individual and group cognitive therapy in the treatment of depressed patients in an inner city health centre. *J R Coll Gen Pr.* 1985;35(274):239-242.
300. Rosso I, Killgore W, Olson E, et al. Internet-based cognitive behavior therapy for major depressive disorder: a randomized controlled trial. *Depress Anxiety.* 2017;34(3):236-245. doi:10.1002/da.22590
301. Rude SS. Relative benefits of assertion or cognitive self-control treatment for depression as a function of proficiency in each domain. *J Consult Clin Psychol.* 1986;54(3):390-394. doi:10.1037//0022-006x.54.3.390
302. Russell A, Gaunt DM, Cooper K, et al. The feasibility of low-intensity psychological therapy for depression co-occurring with autism in adults: the Autism Depression Trial (ADEPT) – a pilot randomised controlled trial. *Autism.* 2019;24(6):1360-1372. doi:10.1177/1362361319889272
303. Ruwaard J, Schrieken B, Schrijver M, et al. Standardized web-based cognitive behavioural therapy of mild to moderate depression: a randomized controlled trial with a long-term follow-up. *Cogn Behav Ther.* 2009;38(4):206-221. doi:10.1080/16506070802408086
304. Ruzickova T, Carson J, Murphy S, Harmer C. P.230 Effects of online behavioural activation on depression during covid-19. *Eur Neuropsychopharmacol.* 2021;44:S36-S37. doi:10.1016/j.euroneuro.2021.01.059
305. Safren SA, O’Cleirigh C, Tan JY, et al. A randomized controlled trial of cognitive behavioral therapy for adherence and depression (CBT-AD) in HIV-infected individuals. *Health Psychol.* 2009;28(1):1-10. doi:10.1037/a0012715
306. Safren SA, Gonzalez JS, Wexler DJ, et al. A randomized controlled trial of cognitive behavioral therapy for adherence and depression (CBT-AD) in patients with uncontrolled type 2 diabetes. *Diabetes Care.* 2014;37(3):625-633. doi:10.2337/dc13-0816
307. Safren SA, Bedoya CA, O’Cleirigh C, et al. Cognitive behavioural therapy for adherence and depression in patients with HIV: a three-arm randomised controlled trial. *Lancet HIV.* 2016;3(11):e529-e538. doi:10.1016/S2352-3018(16)30053-4
308. Safren SA, O’Cleirigh C, Andersen LS, et al. Treating depression and improving adherence in HIV care with task-shared cognitive behavioural therapy in Khayelitsha, South Africa: a randomized controlled trial. *J Int AIDS Soc.* 2021;24(10):e25823. doi:10.1002/jia2.25823
309. Salamanca-Sanabria A, Richards D, Timulak L, et al. A culturally adapted cognitive behavioral internet-delivered intervention for depressive symptoms: Randomized controlled trial. *JMIR Ment Health.* 2020;7(1). doi:10.2196/13392

310. Saloheimo HP, Markowitz J, Saloheimo TH, et al. Psychotherapy effectiveness for major depression: a randomized trial in a Finnish community. *BMC Psychiatry*. 2016;16:131. doi:10.1186/s12888-016-0838-1
311. Sander LB, Paganini S, Terhorst Y, et al. Effectiveness of a Guided Web-Based Self-help Intervention to Prevent Depression in Patients with Persistent Back Pain: The PROD-BP Randomized Clinical Trial. *JAMA Psychiatry*. 2020;77(10):1001-1011. doi:10.1001/jamapsychiatry.2020.1021
312. Savard J, Simard S, Giguere I, et al. Randomized clinical trial on cognitive therapy for depression in women with metastatic breast cancer: psychological and immunological effects. *Palliat Support Care*. 2006;4(3):219-237. doi:10.1017/s1478951506060305
313. Savari Y, Mohagheghi H, Petrocchi N. A preliminary investigation on the effectiveness of compassionate mind training for students with major depressive disorder: A randomized controlled trial. *Mindfulness*. 2021;12(5):1159-1172. doi:10.1007/s12671-020-01584-3
314. Schlicker S, Baumeister H, Buntrock C, et al. A web- And mobile-based intervention for comorbid, recurrent depression in patients with chronic back pain on sick leave (get.back): Pilot randomized controlled trial on feasibility, user satisfaction, and effectiveness. *JMIR Ment Health*. 2020;7(4). doi:10.2196/16398
315. Schmidt MM, Miller WR. Amount of therapist contact and outcome in a multidimensional depression treatment program. *Acta Psychiatr Scand*. 1983;67(5):319-332. doi:10.1111/j.1600-0447.1983.tb00349.x
316. Schramm E, Mack S, Thiel N, Jenkner C, Elsaesser M, Fangmeier T. Interpersonal psychotherapy vs treatment as usual for major depression related to work stress: A pilot randomized controlled study. *Front Psychiatry*. 2020;11. doi:10.3389/fpsy.2020.00193
317. Schulberg HC, Block MR, Madonia MJ, et al. Treating major depression in primary care practice. Eight-month clinical outcomes. *Arch Gen Psychiatry*. 1996;53(10):913-919. doi:10.1001/archpsyc.1996.01830100061008
318. Schuster R, Leitner I, Carlbring P, Laireiter AR. Exploring blended group interventions for depression: randomised controlled feasibility study of a blended computer- and multimedia-supported psychoeducational group intervention for adults with depressive symptoms. *Internet Interv*. 2017;8:63-71. doi:10.1016/j.invent.2017.04.001
319. Scogin F, Hamblin D, Beutler L. Bibliotherapy for depressed older adults: A self-help alternative. *The Gerontologist*. 1987;27(3):383-387. doi:10.1093/geront/27.3.383
320. Scogin F, Jamison C, Gochneaur K. Comparative efficacy of cognitive and behavioral bibliotherapy for mildly and moderately depressed older adults. *J Consult Clin Psychol*. 1989;57(3):403-407. doi:10.1037//0022-006x.57.3.403
321. Scogin FR, Moss K, Harris GM, Presnell AH. Treatment of depressive symptoms in diverse, rural, and vulnerable older adults. *Int J Geriatr Psychiatry*. 2014;29(3):310-316. doi:10.1002/gps.4009
322. Scott MJ, Stradling SG. Group cognitive therapy for depression produces clinically significant reliable change in community-based settings. *Behav Psychother*. 1990;18(01):1-19. doi:10.1017/S014134730001795X

323. Scott AI, Freeman CP. Edinburgh primary care depression study: treatment outcome, patient satisfaction, and cost after 16 weeks. *Bmj*. 1992;304(6831):883-887. doi:10.1136/bmj.304.6831.883
324. Scott C, Tacchi MJ, Jones R, Scott J. Acute and one-year outcome of a randomised controlled trial of brief cognitive therapy for major depressive disorder in primary care. *Br J Psychiatry*. 1997;171:131-134. doi:10.1192/bjp.171.2.131
325. Segre LS, Brock RL, O'Hara MW. Depression treatment for impoverished mothers by point-of-care providers: A randomized controlled trial. *J Consult Clin Psychol*. 2015;83(2):314-324. doi:10.1037/a0038495
326. Selmi PM, Klein MH, Greist JH, Sorrell SP, Erdman HP. Computer-administered cognitive-behavioral therapy for depression. *Am J Psychiatry*. 1990;147(1):51-56. doi:10.1176/ajp.147.1.51
327. Serfaty MA, Haworth D, Blanchard M, Buszewicz M, Murad S, King M. Clinical effectiveness of individual cognitive behavioral therapy for depressed older people in primary care: a randomized controlled trial. *Arch Gen Psychiatry*. 2009;66(12):1332-1340. doi:10.1001/archgenpsychiatry.2009.165
328. Serfaty M, King M, Nazareth I, et al. Effectiveness of cognitive-behavioural therapy for depression in advanced cancer: CanTalk randomised controlled trial. *Br J Psychiatry J Ment Sci*. 2019;216(4):1-9. doi:10.1192/bjp.2019.207
329. Serrano Selva JP, Latorre Postigo JM, Ros Segura L, et al. Life review therapy using autobiographical retrieval practice for older adults with clinical depression. *Psicothema*. 2012;24(2):224-229.
330. Serrano JP, Latorre JM, Gatz M, Montanes J. Life review therapy using autobiographical retrieval practice for older adults with depressive symptomatology. *Psychol Aging*. 2004;19(2):270-277. doi:10.1037/0882-7974.19.2.270
331. Shaw BF. Comparison of cognitive therapy and behavior therapy in the treatment of depression. *J Consult Clin Psychol*. 1977;45(4):543. doi:10.1037//0022-006x.45.4.543
332. Sheeber LB, Seeley JR, Feil EG, et al. Development and pilot evaluation of an Internet-facilitated cognitive-behavioral intervention for maternal depression. *J Consult Clin Psychol*. 2012;80(5):739-749. doi:10.1037/a0028820
333. Sheeber L, Feil E, Seeley J, et al. Mom-net: evaluation of an internet-facilitated cognitive behavioral intervention for low-income depressed mothers. *J Consult Clin Psychol*. 2017;85(4):355-366. doi:10.1037/ccp0000175
334. Shih VWY, Chan WC, Tai OK, Wong HL, Cheng CPW, Wong CSM. Mindfulness-Based Cognitive Therapy for Late-Life Depression: a Randomised Controlled Trial. *East Asian Arch Psychiatry*. 2021;31(2):27-35. doi:10.12809/eaap2075
335. Sikander S, Ahmad I, Atif N, et al. Delivering the Thinking Healthy Programme for perinatal depression through volunteer peers: a cluster randomised controlled trial in Pakistan. *Lancet Psychiatry*. 2019;6(2):128-139. doi:10.1016/S2215-0366(18)30467-X
336. Simoni JM, Wiebe JS, Saucedo JA, et al. A preliminary RCT of CBT-AD for adherence and depression among HIV-positive Latinos on the U.S.-Mexico border: the Nuevo Dia study. *AIDS Behav*. 2013;17(8):2816-2829. doi:10.1007/s10461-013-0538-5

337. Simpson S, Corney R, Beecham J. A randomized controlled trial to evaluate the effectiveness and cost-effectiveness of psychodynamic counselling for general practice patients with chronic depression. *Psychol Med.* 2003;33(2):229-239. doi:10.1017/s0033291702006517
338. Simson U, Nawarotzky U, Friese G, et al. Psychotherapy intervention to reduce depressive symptoms in patients with diabetic foot syndrome. *Diabet Med.* 2008;25(2):206-212. doi:10.1111/j.1464-5491.2007.02370.x
339. Sinniah A, Oei T, Maniam T, Subramaniam P. Positive effects of Individual Cognitive Behavior Therapy for patients with unipolar mood disorders with suicidal ideation in Malaysia: a randomised controlled trial. *Psychiatry Res.* 2017;254:179-189. doi:10.1016/j.psychres.2017.04.026
340. Sirey JA, Solomonov N, Guillod A, et al. PROTECT: a novel psychotherapy for late-life depression in elder abuse victims. *Int Psychogeriatr.* 2021;33(5):521-525. doi:10.1017/s1041610221000430
341. Smit A, Kluiter H, Conradi HJ, et al. Short-term effects of enhanced treatment for depression in primary care: results from a randomized controlled trial. *Psychol Med.* 2006;36(1):15-26. doi:10.1017/S0033291705006318
342. Smith J, Newby JM, Burston N, et al. Help from home for depression: A randomised controlled trial comparing internet-delivered cognitive behaviour therapy with bibliotherapy for depression. *Internet Interv.* 2017;9:25-37. doi:10.1016/j.invent.2017.05.001
343. Songprakun W, McCann TV. Evaluation of a cognitive behavioural self-help manual for reducing depression: a randomized controlled trial. *J Psychiatr Ment Health Nurs.* 2012;19(7):647-653. doi:10.1111/j.1365-2850.2011.01861.x
344. Spek V, Nyklicek I, Smits N, et al. Internet-based cognitive behavioural therapy for subthreshold depression in people over 50 years old: a randomized controlled clinical trial. *Psychol Med.* 2007;37(12):1797-1806. doi:10.1017/s0033291707000542
345. Spinelli MG, Endicott J. Controlled clinical trial of interpersonal psychotherapy versus parenting education program for depressed pregnant women. *Am J Psychiatry.* 2003;160(3):555-562. doi:10.1176/appi.ajp.160.3.555
346. Spinelli MG, Endicott J, Leon AC, et al. A controlled clinical treatment trial of interpersonal psychotherapy for depressed pregnant women at 3 New York City sites. *J Clin Psychiatry.* 2013;74(4):393-399. doi:10.4088/JCP.12m07909
347. Spruill TM, Friedman D, Diaz L, et al. Telephone-based depression self-management in Hispanic adults with epilepsy: a pilot randomized controlled trial. *Transl Behav Med.* 2021;11(7):1451-1460. doi:10.1093/tbm/ibab045
348. Sreevani R, Reddemma K, Chan CL, Leung PP, Wong V, Chan CH. Effectiveness of integrated body-mind-spirit group intervention on the well-being of Indian patients with depression: a pilot study. *J Nurs Res.* 2013;21(3):179-186. doi:10.1097/jnr.0b013e3182a0b041
349. Stiles-Shields C, Montague E, Kwasny MJ, Mohr DC. Behavioral and cognitive intervention strategies delivered via coached apps for depression: Pilot trial. *Psychol Serv.* 2018;16(2):233-238. doi:10.1037/ser0000261
350. Strauss C, Hayward M, Chadwick P. Group person-based cognitive therapy for chronic depression: a pilot randomized controlled trial. *Br J Clin Psychol.* 2012;51(3):345-350. doi:10.1111/j.2044-8260.2012.02036.x

351. Strong V, Waters R, Hibberd C, et al. Management of depression for people with cancer (SMaRT oncology 1): a randomised trial. *Lancet*. 2008;372(9632):40-48. doi:10.1016/s0140-6736(08)60991-5
352. Sugg HVR, Richards DA, Frost J. Morita Therapy for depression (Morita Trial): a pilot randomised controlled trial. *BMJ Open*. 2018;8(8):e021605. doi:10.1136/bmjopen-2018-021605
353. Swartz HA, Frank E, Zuckoff A, et al. Brief interpersonal psychotherapy for depressed mothers whose children are receiving psychiatric treatment. *Am J Psychiatry*. 2008;165(9):1155-1162. doi:10.1176/appi.ajp.2008.07081339
354. Szumska I, Gola M, Rusanowska M, et al. Mindfulness-based cognitive therapy reduces clinical symptoms, but do not change frontal alpha asymmetry in people with major depression disorder. *Int J Neurosci*. Published online 2020. doi:10.1080/00207454.2020.1748621
355. Takagaki K, Okamoto Y, Jinnin R, et al. Behavioral activation for late adolescents with subthreshold depression: a randomized controlled trial. *Eur Child Adolesc Psychiatry*. 2016;25(11):1171-1182. doi:10.1007/s00787-016-0842-5
356. Talbot NL, Chaudron LH, Ward EA, et al. A randomized effectiveness trial of interpersonal psychotherapy for depressed women with sexual abuse histories. *Psychiatr Serv*. 2011;62(4):374-380. doi:10.1176/appi.ps.62.4.374
357. Taylor FG, Marshall WL. Experimental analysis of a cognitive-behavioral therapy for depression. *Cogn Ther Res*. 1977;1(1):59-72. doi:10.1007/BF01173505
358. Taylor CB, Conrad A, Wilhelm FH, et al. Does improving mood in depressed patients alter factors that may affect cardiovascular disease risk? *J Psychiatr Res*. 2009;43(16):1246-1252. doi:10.1016/j.jpsychires.2009.05.006
359. Teasdale JD, Fennell MJ, Hibbert GA, Amies PL. Cognitive therapy for major depressive disorder in primary care. *Br J Psychiatry*. 1984;144:400-406. doi:10.1192/bjp.144.4.400
360. Teichman Y, Bar-el Z, Shor H, Sirota P, Elizur A. A comparison of two modalities of cognitive therapy (individual and marital) in treating depression. *Psychiatry*. 1995;58(2):136-148. doi:10.1080/00332747.1995.11024721
361. Teri L, Logsdon RG, Uomoto J, McCurry SM. Behavioral treatment of depression in dementia patients: a controlled clinical trial. *J Gerontol B Psychol Sci Soc Sci*. 1997;52(4):P159-66. doi:10.1093/geronb/52b.4.p159
362. Thomas SA, Drummond AE, Lincoln NB, et al. Behavioural activation therapy for post-stroke depression: the BEADS feasibility RCT. *Health Technol Assess Winch Engl*. 2019;23(47):1-176. doi:20190916111043841
363. Titov N, Andrews G, Davies M, McIntyre K, Robinson E, Solley K. Internet treatment for depression: a randomized controlled trial comparing clinician vs. technician assistance. *PLoS One*. 2010;5(6):e10939. doi:10.1371/journal.pone.0010939
364. Titov N, Dear BF, Ali S, et al. Clinical and cost-effectiveness of therapist-guided internet-delivered cognitive behavior therapy for older adults with symptoms of depression: a randomized controlled trial. *Behav Ther*. 2015;46(2):193-205. doi:10.1016/j.beth.2014.09.008
365. Tobin K, Davey-Rothwell MA, Nonyane BAS, Knowlton A, Wissow L, Latkin CA. RCT of an integrated CBT-HIV intervention on depressive symptoms and HIV risk. *PLoS One*. 2017;12(12):e0187180. doi:10.1371/journal.pone.0187180

366. Tomasino K, Lattie E, Ho J, Palac H, Kaiser S, Mohr D. Harnessing Peer Support in an Online Intervention for Older Adults with Depression. *Am J Geriatr Psychiatry*. 2017;25(10):1109-1119. doi:10.1016/j.jagp.2017.04.015
367. Tong P, Bu P, Yang Y, Dong L, Sun T, Shi Y. Group cognitive behavioural therapy can reduce stigma and improve treatment compliance in major depressive disorder patients. *Early Interv Psychiatry*. 2019;14(2):172-178. doi:10.1111/eip.12841
368. Tovote KA, Fleer J, Snippe E, et al. Individual mindfulness-based cognitive therapy and cognitive behavior therapy for treating depressive symptoms in patients with diabetes: Results of a randomized controlled trial. *Diabetes Care*. 2014;37(9):2427-2434. doi:10.2337/dc13-2918
369. Town J, Abbass A, Stride C, Bernier D. A randomised controlled trial of Intensive Short-Term Dynamic Psychotherapy for treatment resistant depression: the Halifax Depression Study. *J Affect Disord*. 2017;214:15-25. doi:10.1016/j.jad.2017.02.035
370. Trevillion K, Ryan EG, Pickles A, et al. An exploratory parallel-group randomised controlled trial of antenatal Guided Self-Help (plus usual care) versus usual care alone for pregnant women with depression: DAWN trial. *J Affect Disord*. 2020;261:187-197. doi:10.1016/j.jad.2019.10.013
371. Tulbure BT, Andersson G, Salagean N, Pearce M, Koenig HG. Religious versus Conventional Internet-based Cognitive Behavioral Therapy for Depression. *J Relig Health*. 2018;57(5):1634-1648. doi:10.1007/s10943-017-0503-0
372. Turner RW, Ward MF, Turner DJ. Behavioral treatment for depression: An evaluation of therapeutic components. *J Clin Psychol*. 1979;35(1):166-175. doi:10.1002/1097-4679(197901)35:1<166::aid-jclp2270350127>3.0.co;2-1
373. Turner A, Hambridge J, Baker A, Bowman J, McElduff P. Randomised controlled trial of group cognitive behaviour therapy versus brief intervention for depression in cardiac patients. *Aust N Z J Psychiatry*. 2013;47(3):235-243. doi:10.1177/0004867412460592
374. Tyson GM, Range LM. Gestalt dialogues as a treatment for mild depression: time works just as well. *J Clin Psychol*. 1987;43(2):227-231. doi:10.1002/1097-4679(198703)43:2<227::aid-jclp2270430210>3.0.co;2-m
375. Unlu Ince B, Cuijpers P, t Hof E, Balleghooijen W, Christensen H, Riper H. Internet-based, culturally sensitive, problem-solving therapy for Turkish migrants with depression: randomized controlled trial. *J Med Internet Res*. 2013;15(10):e227. doi:10.2196/jmir.2853
376. van Bastelaar KM, Pouwer F, Cuijpers P, Riper H, Snoek FJ. Web-based depression treatment for type 1 and type 2 diabetic patients: a randomized, controlled trial. *Diabetes Care*. 2011;34(2):320-325. doi:10.2337/dc10-1248
377. Van Lieshout RJ, Layton H, Savoy CD, et al. Effect of Online 1-Day Cognitive Behavioral Therapy-Based Workshops Plus Usual Care vs Usual Care Alone for Postpartum Depression: A Randomized Clinical Trial. *JAMA Psychiatry*. 2021;78(11):1200-1207. doi:10.1001/jamapsychiatry.2021.2488
378. van Schaik A, van Marwijk H, Adèr H, et al. Interpersonal Psychotherapy for Elderly Patients in Primary Care. *Am J Geriatr Psychiatry*. 2006;14(9):777-786. doi:10.1097/01.JGP.0000199341.25431.4b
379. Vazquez Gonzalez FL, Otero Otero P, Torres Iglesias A, Hermida García E, Blanco Seoane V, Díaz Fernández O. A brief problem-solving indicated-prevention intervention for prevention

- of depression in nonprofessional caregivers. *Psicothema*. 2013;25(1):87-92. doi:10.7334/psicothema2012.89
380. Vázquez FL, Torres Á, Otero P, Blanco V, Díaz O, Estévez LE. Analysis of the components of a cognitive-behavioral intervention administered via conference call for preventing depression among non-professional caregivers: A pilot study. *Aging Ment Health*. 2017;21(9):938-946. doi:10.1080/13607863.2016.1181714
381. Vázquez FL, López L, Torres Á J, et al. Analysis of the Components of a Cognitive-Behavioral Intervention for the prevention of Depression Administered via Conference Call to Nonprofessional Caregivers: A Randomized Controlled Trial. *Int J Env Res Public Health*. 2020;17(6). doi:10.3390/ijerph17062067
382. Verduyn C, Barrowclough C, Roberts J, Tarrier N, Harrington R. Maternal depression and child behaviour problems Randomised placebo-controlled trial of a cognitive-behavioural group intervention. *Br J Psychiatry*. 2003;183(OCT.):342-348. doi:10.1192/bjp.183.4.342
383. Vernmark K, Lenndin J, Björnehed J, et al. Internet administered guided self-help versus individualized e-mail therapy: A randomized trial of two versions of CBT for major depression. *Behav Res Ther*. 2010;48(5):368-376. doi:10.1016/j.brat.2010.01.005
384. Vigod SN, Slyfield Cook G, Macdonald K, et al. Mother matters: Pilot randomized wait-list controlled trial of an online therapist-facilitated discussion board and support group for postpartum depression symptoms. *Depress Anxiety*. 2021;38(8):816-825. doi:10.1002/da.23163
385. Vitriol VG, Ballesteros ST, Florenzano RU, Weil KP, Benadof DF. Evaluation of an outpatient intervention for women with severe depression and a history of childhood trauma. *Psychiatr Serv*. 2009;60(7):936-942. doi:10.1176/appi.ps.60.7.936
386. Warmerdam L, Straten A, Twisk J, Riper H, Cuijpers P. Internet-based treatment for adults with depressive symptoms: randomized controlled trial. *J Med Internet Res*. 2008;10(4):e44. doi:10.2196/jmir.1094
387. Watkins ER, Taylor RS, Byng R, et al. Guided self-help concreteness training as an intervention for major depression in primary care: a Phase II randomized controlled trial. *Psychol Med*. 2012;42(7):1359-1371. doi:10.1017/s0033291711002480
388. Watt LM, Cappeliez P. Integrative and instrumental reminiscence therapies for depression in older adults: Intervention strategies and treatment effectiveness. *Aging Ment Health*. 2000;4(2):166-177. doi:10.1080/13607860050008691
389. Weissman MM, Prusoff BA, Dimascio A, Neu C, Goklaney M, Klerman GL. The efficacy of drugs and psychotherapy in the treatment of acute depressive episodes. *Am J Psychiatry*. 1979;136(4b):555-558. doi:10.1176/ajp.1979.136.4b.555
390. Westerhof GJ, Lamers SMA, Postel MG, Bohlmeijer ET. Online Therapy for Depressive Symptoms: An Evaluation of Counselor-Led and Peer-Supported Life Review Therapy. *The Gerontologist*. 2019;59(1):135-146. doi:10.1093/geront/gnx140
391. Wickberg B, Hwang CP. Counselling of postnatal depression: a controlled study on a population based Swedish sample. *J Affect Disord*. 1996;39(3):209-216. doi:10.1016/0165-0327(96)00034-1
392. Wiersma JE, Schaik DJF, Hoogendorn AW, et al. The effectiveness of the cognitive behavioral analysis system of psychotherapy for chronic depression: A randomized controlled trial. *Psychother Psychosom*. 2014;83(5):263-269. doi:10.1159/000360795



393. Wiklund I, Mohlkert P, Edman G. Evaluation of a brief cognitive intervention in patients with signs of postnatal depression: a randomized controlled trial. *Acta Obstet Gynecol Scand.* 2010;89(8):1100-1104. doi:10.3109/00016349.2010.500369
394. Williams JW, Barrett J, Oxman T, et al. Treatment of dysthymia and minor depression in primary care: A randomized controlled trial in older adults. *Jama.* 2000;284(12):1519-1526. doi:10.1001/jama.284.12.1519
395. Williams AD, Blackwell SE, Mackenzie A, Holmes EA, Andrews G. Combining imagination and reason in the treatment of depression: A randomized controlled trial of internet-based cognitive-bias modification and internet-CBT for depression. *J Consult Clin Psychol.* 2013;81(5):793-799. doi:10.1037/a0033247
396. Williams C, Wilson P, Morrison J, et al. Guided Self-Help Cognitive Behavioural Therapy for Depression in Primary Care: A Randomised Controlled Trial. *PLoS ONE.* 2013;8(1):e52735. doi:10.1371/journal.pone.0052735
397. Williams C, McClay CA, Matthews L, et al. Community-based group guided self-help intervention for low mood and stress: Randomised controlled trial. *Br J Psychiatry.* 2018;212(2):88-95. doi:10.1192/bjp.2017.18
398. Wilson PH, Goldin JC, Charbonneau-Powis M. Comparative efficacy of behavioral and cognitive treatments of depression. *Cogn Ther Res.* 1983;7(2):111-124. doi:10.1007/BF01190064
399. Wollersheim JP, Wilson GL. Group treatment of unipolar depression: A comparison of coping, supportive, bibliotherapy, and delayed treatment groups. *Prof Psychol Res Pract.* 1991;22(6):496. doi:10.1037/0735-7028.22.6.496
400. Wong DF. Cognitive and health-related outcomes of group cognitive behavioural treatment for people with depressive symptoms in Hong Kong: randomized wait-list control study. *Aust N Z J Psychiatry.* 2008;42(8):702-711. doi:10.1080/00048670802203418
401. Wong DF. Cognitive behavioral treatment groups for people with chronic depression in Hong Kong: a randomized wait-list control design. *Depress Anxiety.* 2008;25(2):142-148. doi:10.1002/da.20286
402. Wong SYS, Sun YY, Chan ATY, et al. Treating Subthreshold Depression in Primary Care: a Randomized Controlled Trial of Behavioral Activation With Mindfulness. *Ann Fam Med.* 2018;16(2):111-119. doi:10.1370/afm.2206
403. Wright JH, Wright AS, Albano AM, et al. Computer-assisted cognitive therapy for depression: maintaining efficacy while reducing therapist time. *Am J Psychiatry.* 2005;162(6):1158-1164. doi:10.1176/appi.ajp.162.6.1158
404. Wuthrich VM, Rapee RM. Randomised controlled trial of group cognitive behavioural therapy for comorbid anxiety and depression in older adults. *Behav Res Ther.* 2013;51(12):779-786. doi:10.1016/j.brat.2013.09.002
405. Wuthrich VM, Rapee RM, Kangas M, Perini S. Randomized controlled trial of group cognitive behavioral therapy compared to a discussion group for co-morbid anxiety and depression in older adults. *Psychol Med.* 2016;46(4):785-795. doi:10.1017/s0033291715002251
406. Xie J, He G, Ding S, et al. A randomized study on the effect of modified behavioral activation treatment for depressive symptoms in rural left-behind elderly. *Psychother Res J Soc Psychother Res.* 2019;29(3):372-382. doi:10.1080/10503307.2017.1364444

407. Yang X, Zhao J, Chen Y, Zu S, Zhao J. Comprehensive self-control training benefits depressed college students: a six-month randomized controlled intervention trial. *J Affect Disord.* 2018;226:251-260. doi:10.1016/j.jad.2017.10.014
408. Yeung A, Wang F, Feng F, et al. Outcomes of an online computerized cognitive behavioral treatment program for treating chinese patients with depression: A pilot study. *Asian J Psychiatry.* 2017;38:102-107. doi:10.1016/j.ajp.2017.11.007
409. Yuan J, Yin Y, Tang X, et al. Culturally adapted and lay-delivered cognitive behaviour therapy for older adults with depressive symptoms in rural China: a pilot trial. *Behav Cogn Psychother.* Published online 2020:1-5. doi:10.1017/S1352465820000818
410. Zemestani M, Mozaffari S. Acceptance and commitment therapy for the treatment of depression in persons with physical disability: a randomized controlled trial. *Clin Rehabil.* 2020;34(7):938-947. doi:10.1177/0269215520923135
411. Zemestani M, Davoodi I, Honarmand MM, Zargar Y, Ottaviani C. Comparative effects of group metacognitive therapy versus behavioural activation in moderately depressed students. *J Ment Health.* 2016;25(6):479-485. doi:10.3109/09638237.2015.1057326
412. Zemestani M, Fazeli Nikoo Z. Effectiveness of mindfulness-based cognitive therapy for comorbid depression and anxiety in pregnancy: a randomized controlled trial. *Arch Womens Ment Health.* 2019;23(2):207-214. doi:10.1007/s00737-019-00962-8
413. Zhao Y, Munro-Kramer ML, Shi S, Wang J, Zhao Q. Effects of antenatal depression screening and intervention among Chinese high-risk pregnant women with medically defined complications: A randomized controlled trial. *Early Interv Psychiatry.* 2019;13(5):1090-1098. doi:10.1111/eip.12731
414. Zhao Y, Lin Q, Wang J. An evaluation of a prenatal individualised mixed management intervention addressing breastfeeding outcomes and postpartum depression: A randomised controlled trial. *J Clin Nurs.* 2021;30(9-10):1347-1359. doi:10.1111/jocn.15684
415. Zu S, Xiang YT, Liu J, et al. A comparison of cognitive-behavioral therapy, antidepressants, their combination and standard treatment for Chinese patients with moderate-severe major depressive disorders. *J Affect Disord.* 2014;152-154:262-267. doi:10.1016/j.jad.2013.09.022
416. Higgins JPT, Altman DG, Gotzsche PC, et al. The Cochrane Collaboration's tool for assessing risk of bias in randomised trials. *BMJ.* 2011;343(oct18 2):d5928-d5928. doi:10.1136/bmj.d5928

**eTable 2 Summary characteristics of included primary studies**

| <b>Summary characteristics of included effect sizes from primary studies.</b> |                              |
|-------------------------------------------------------------------------------|------------------------------|
| <b>Characteristic</b>                                                         | <b>N = 1,206<sup>1</sup></b> |
| Target Group                                                                  |                              |
| Adults                                                                        | 521 (43%)                    |
| General Medical                                                               | 230 (19%)                    |
| Older Adults                                                                  | 114 (9.5%)                   |
| Other Target Groups                                                           | 156 (13%)                    |
| Perinatal Depression                                                          | 132 (11%)                    |
| Student Population                                                            | 53 (4.4%)                    |
| Region                                                                        |                              |
| Australia                                                                     | 82 (6.8%)                    |
| East Asia                                                                     | 79 (6.6%)                    |
| Europe                                                                        | 419 (35%)                    |
| North America                                                                 | 534 (44%)                    |
| Other Region                                                                  | 92 (7.6%)                    |
| Intervention                                                                  |                              |
| CBT-Based                                                                     | 879 (73%)                    |
| Not-CBT-Based                                                                 | 327 (27%)                    |
| Format                                                                        |                              |
| Group                                                                         | 326 (27%)                    |
| Guided Self-Help                                                              | 282 (23%)                    |
| Individual                                                                    | 451 (37%)                    |
| Other Formats                                                                 | 147 (12%)                    |
| Control                                                                       |                              |
| CAU                                                                           | 484 (40%)                    |
| Other Ctr                                                                     | 189 (16%)                    |
| WL                                                                            | 533 (44%)                    |
| diagnosis                                                                     |                              |
| Cut-Off Score                                                                 | 497 (41%)                    |
| Diagnosis                                                                     | 652 (54%)                    |
| Subclinical Depression                                                        | 57 (4.7%)                    |
| Risk of Bias                                                                  |                              |
| High                                                                          | 21 (1.7%)                    |
| Low                                                                           | 403 (33%)                    |
| Some Concern                                                                  | 782 (65%)                    |
| <sup>1</sup> n (%)                                                            |                              |

**eTable 3 Distribution of summary effect size estimates for Which factor: Control condition**

| <b>Summary effect sizes by control</b> |                      |                      |                      |                 |
|----------------------------------------|----------------------|----------------------|----------------------|-----------------|
| <b>Control</b>                         | <b>Mean <i>g</i></b> | <b>Mean CI Lower</b> | <b>Mean CI Upper</b> | <b><i>k</i></b> |
| Wait List                              | 0.66                 | 0.348                | 0.96                 | 836             |
| All control conditions                 | 0.55                 | 0.294                | 0.81                 | 1,872           |
| Care as usual                          | 0.52                 | 0.224                | 0.82                 | 1,194           |
| Other control groups                   | 0.53                 | 0.086                | 0.98                 | 379             |

Note: Mean Hedges' *g* effect size information, including 95% Confidence Interval lower and upper bounds and number of included meta-analyses in the multiverse of meta-analyses.

**eTable 4 Distribution of summary effect size estimates for Which factor: Diagnosis**

| Summary effect sizes by Which factor: Diagnosis |               |               |               |          |
|-------------------------------------------------|---------------|---------------|---------------|----------|
| Diagnosis                                       | Mean <i>g</i> | Mean CI Lower | Mean CI Upper | <i>k</i> |
| Subclinical depression                          | 0.57          | 0.049         | 1.10          | 84       |
| Cut-off score                                   | 0.57          | 0.226         | 0.90          | 1,045    |
| Diagnosis                                       | 0.56          | 0.276         | 0.85          | 1,224    |
| All diagnoses                                   | 0.56          | 0.292         | 0.83          | 1,928    |

Note: Mean Hedges' *g* effect size information, including 95% Confidence Interval lower and upper bounds and number of included meta-analyses in the multiverse of meta-analyses.

**eTable 5 Distribution of summary effect size estimates for Which factor: Format**

| <b>Summary effect sizes by Which factor: therapy format</b> |               |                      |                      |          |
|-------------------------------------------------------------|---------------|----------------------|----------------------|----------|
| <b>Format</b>                                               | <b>Mean g</b> | <b>Mean CI Lower</b> | <b>Mean CI Upper</b> | <b>k</b> |
| Group                                                       | 0.76          | 0.32                 | 1.19                 | 536      |
| Other formats                                               | 0.56          | 0.22                 | 0.90                 | 340      |
| All formats                                                 | 0.56          | 0.30                 | 0.81                 | 1,823    |
| Individual                                                  | 0.51          | 0.19                 | 0.82                 | 996      |
| Guided self-help                                            | 0.50          | 0.27                 | 0.72                 | 586      |

Note: Mean Hedges' g effect size information, including 95% Confidence Interval lower and upper bounds and number of included meta-analyses in the multiverse of meta-analyses.

**eTable 6 Distribution of summary effect size estimates for Which factor: Method**

| <b>Summary effect sizes by meta-analytical method</b> |                            |                      |                      |                       |
|-------------------------------------------------------|----------------------------|----------------------|----------------------|-----------------------|
| <b>Method</b>                                         | <b>Mean <math>g</math></b> | <b>Mean CI Lower</b> | <b>Mean CI Upper</b> | <b><math>k</math></b> |
| 3-LEVEL                                               | 0.66                       | 0.36                 | 0.96                 | 963                   |
| RVE                                                   | 0.66                       | 0.27                 | 1.05                 | 963                   |
| REML                                                  | 0.64                       | 0.42                 | 0.86                 | 591                   |
| P-UNIFORM                                             | 0.60                       | 0.29                 | 0.89                 | 582                   |
| FE                                                    | 0.52                       | 0.44                 | 0.60                 | 591                   |
| PET-PEESE                                             | 0.18                       | -0.24                | 0.59                 | 591                   |

Note: Mean Hedges'  $g$  effect size information, including 95% Confidence Interval lower and upper bounds and number of included meta-analyses in the multiverse of meta-analyses.

**eTable 7 Distribution of summary effect size estimates for Which factor: Type**

| <b>Summary effect sizes by type</b> |                      |                      |                      |          |
|-------------------------------------|----------------------|----------------------|----------------------|----------|
| <b>Type</b>                         | <b>Mean <i>g</i></b> | <b>Mean CI Lower</b> | <b>Mean CI Upper</b> | <b>k</b> |
| CBT-based                           | 0.60                 | 0.29                 | 0.91                 | 1,620    |
| All types                           | 0.56                 | 0.27                 | 0.84                 | 1,928    |
| Not-CBT-based                       | 0.48                 | 0.19                 | 0.78                 | 733      |

Note: Mean Hedges' *g* effect size information, including 95% Confidence Interval lower and upper bounds and number of included meta-analyses in the multiverse of meta-analyses.



**eTable 8 Distribution of summary effect size estimates for Which factor: Risk of bias**

| <b>Summary effect sizes by risk of bias</b> |                      |                      |                      |                 |
|---------------------------------------------|----------------------|----------------------|----------------------|-----------------|
| <b>Risk of Bias</b>                         | <b>Mean <i>g</i></b> | <b>Mean CI Lower</b> | <b>Mean CI Upper</b> | <b><i>k</i></b> |
| Exclude high risk of bias studies           | 0.61                 | 0.27                 | 0.95                 | 2,413           |
| Include all studies                         | 0.56                 | 0.35                 | 0.77                 | 834             |
| Include only low risk of bias studies       | 0.45                 | 0.19                 | 0.72                 | 1,034           |

Note: Mean Hedges' *g* effect size information, including 95% Confidence Interval lower and upper bounds and number of included meta-analyses in the multiverse of meta-analyses.

**eTable 9 Distribution of summary effect size estimates for Which factor: Target Group**

| Summary effect sizes by target group |               |               |               |          |
|--------------------------------------|---------------|---------------|---------------|----------|
| Target group                         | Mean <i>g</i> | Mean CI Lower | Mean CI Upper | <i>k</i> |
| Student population                   | 0.82          | 0.51          | 1.12          | 54       |
| Other target groups                  | 0.69          | 0.19          | 1.18          | 325      |
| Older adults                         | 0.64          | 0.23          | 1.05          | 295      |
| Perinatal depression                 | 0.60          | 0.27          | 0.92          | 286      |
| General medical                      | 0.58          | 0.18          | 0.97          | 475      |
| All groups                           | 0.54          | 0.31          | 0.78          | 1,770    |
| Adults                               | 0.51          | 0.26          | 0.75          | 1,076    |

Note: Mean Hedges' *g* effect size information, including 95% Confidence Interval lower and upper bounds and number of included meta-analyses in the multiverse of meta-analyses.

**eTable 10 Sensitivity analyses for multiverse size**

| Mean summary effect sizes for different numbers of included primary studies. |          |               |           |           |         |         |              |              |
|------------------------------------------------------------------------------|----------|---------------|-----------|-----------|---------|---------|--------------|--------------|
| Number of Specifications                                                     | <i>k</i> | Mean <i>g</i> | 95% CI LB | 95% CI UB | Minimum | Maximum | 25% Quantile | 75% Quantile |
| k > 10                                                                       | 4281     | 0.56          | 0.27      | 0.86      | -0.66   | 2.5     | 0.42         | 0.71         |
| k > 25                                                                       | 2138     | 0.59          | 0.39      | 0.79      | -0.44   | 1.4     | 0.46         | 0.71         |
| k > 50                                                                       | 1110     | 0.62          | 0.46      | 0.78      | -0.22   | 1.4     | 0.50         | 0.72         |

Notes. *k* = number of included meta-analyses; Mean *g* = mean Hedges' *g* of all included meta-analyses; 95% CI LB = Lower bound of 95% confidence interval; 95% CI UB = Upper bound of 95% confidence interval; Minimum = smallest summary effect size estimate; Maximum = largest summary effect size estimate; 25% Quantile = 25% of studies have a Hedges *g* equal or lower than this value; 75% Quantile = 75% of studies have a Hedges *g* equal or lower than this value, 50% of all summary effect size estimates are between these two quantiles

**eFigure 1 Average effect size estimates for Which factor: Control condition**

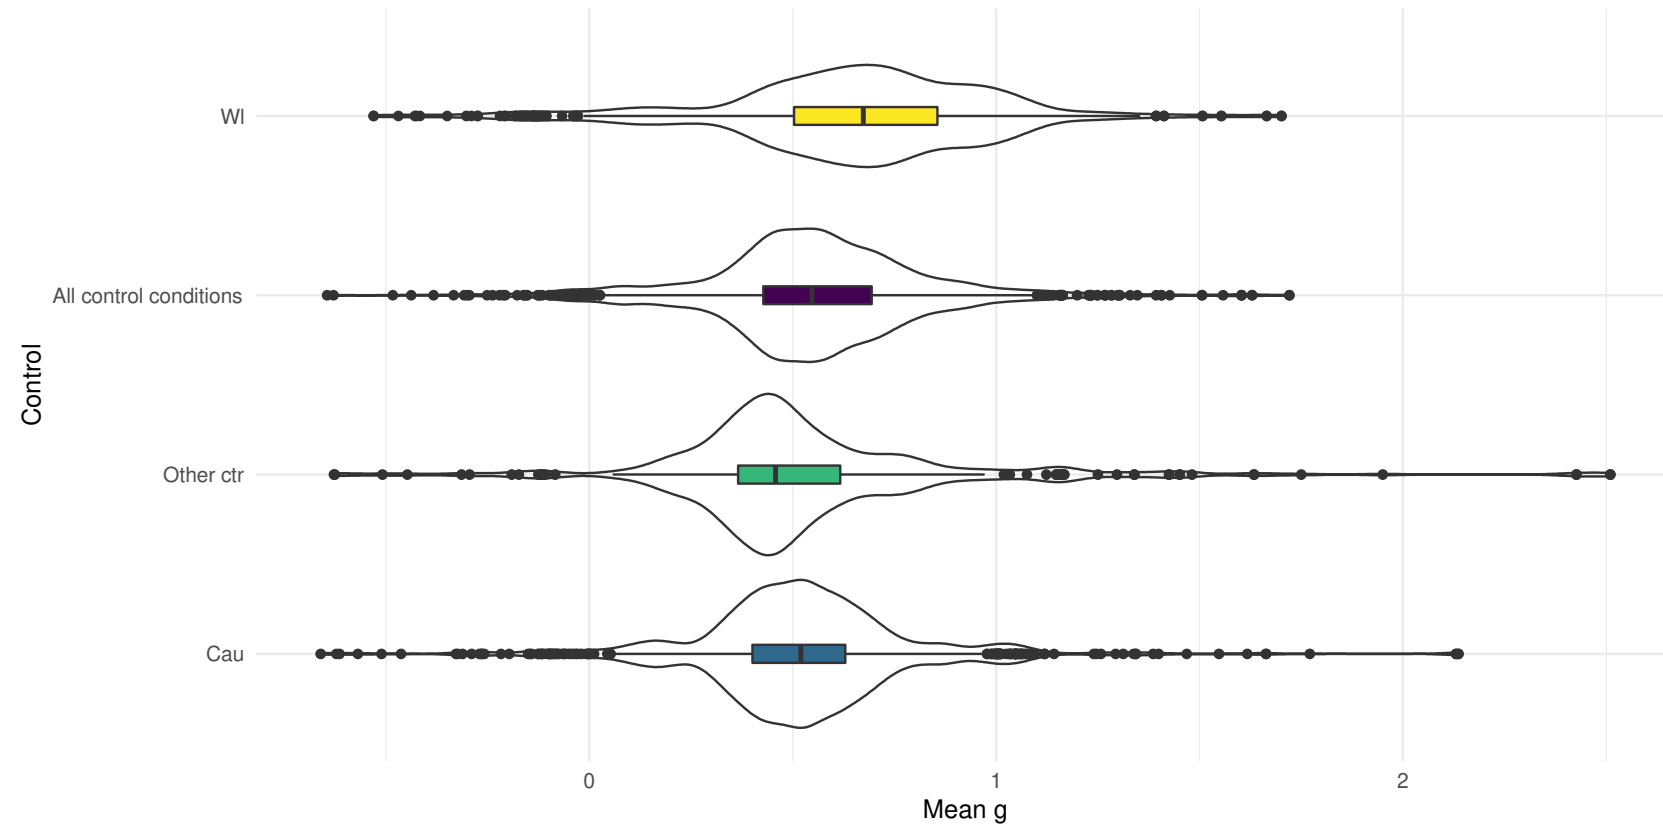

**eFigure 2 Average effect size estimates for Which factor: Diagnosis**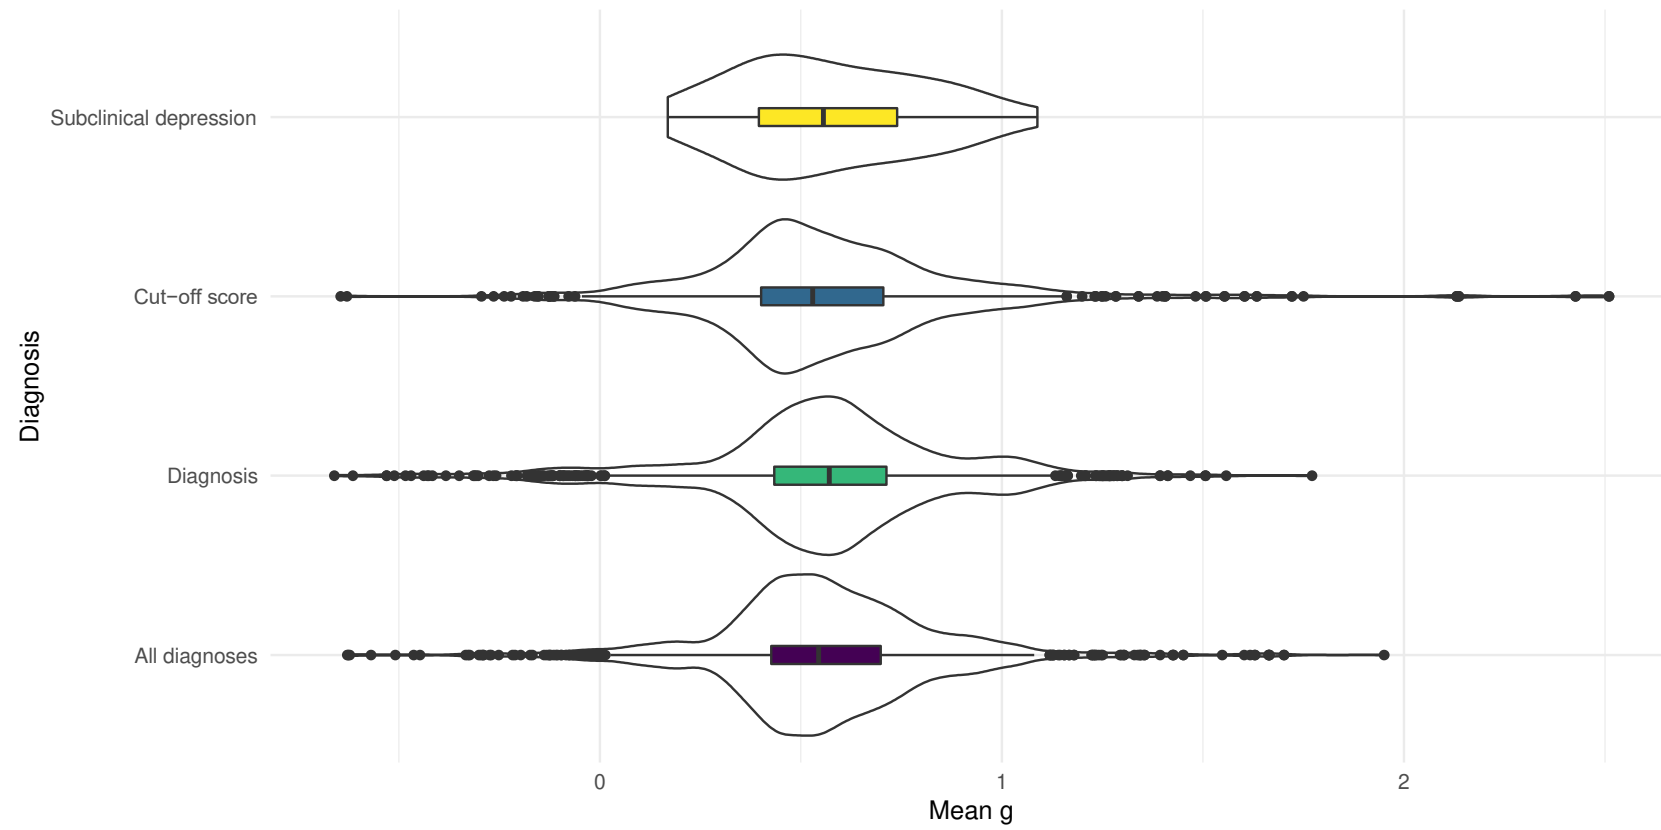

**eFigure 3 Average effect size estimates for Which factor: Format**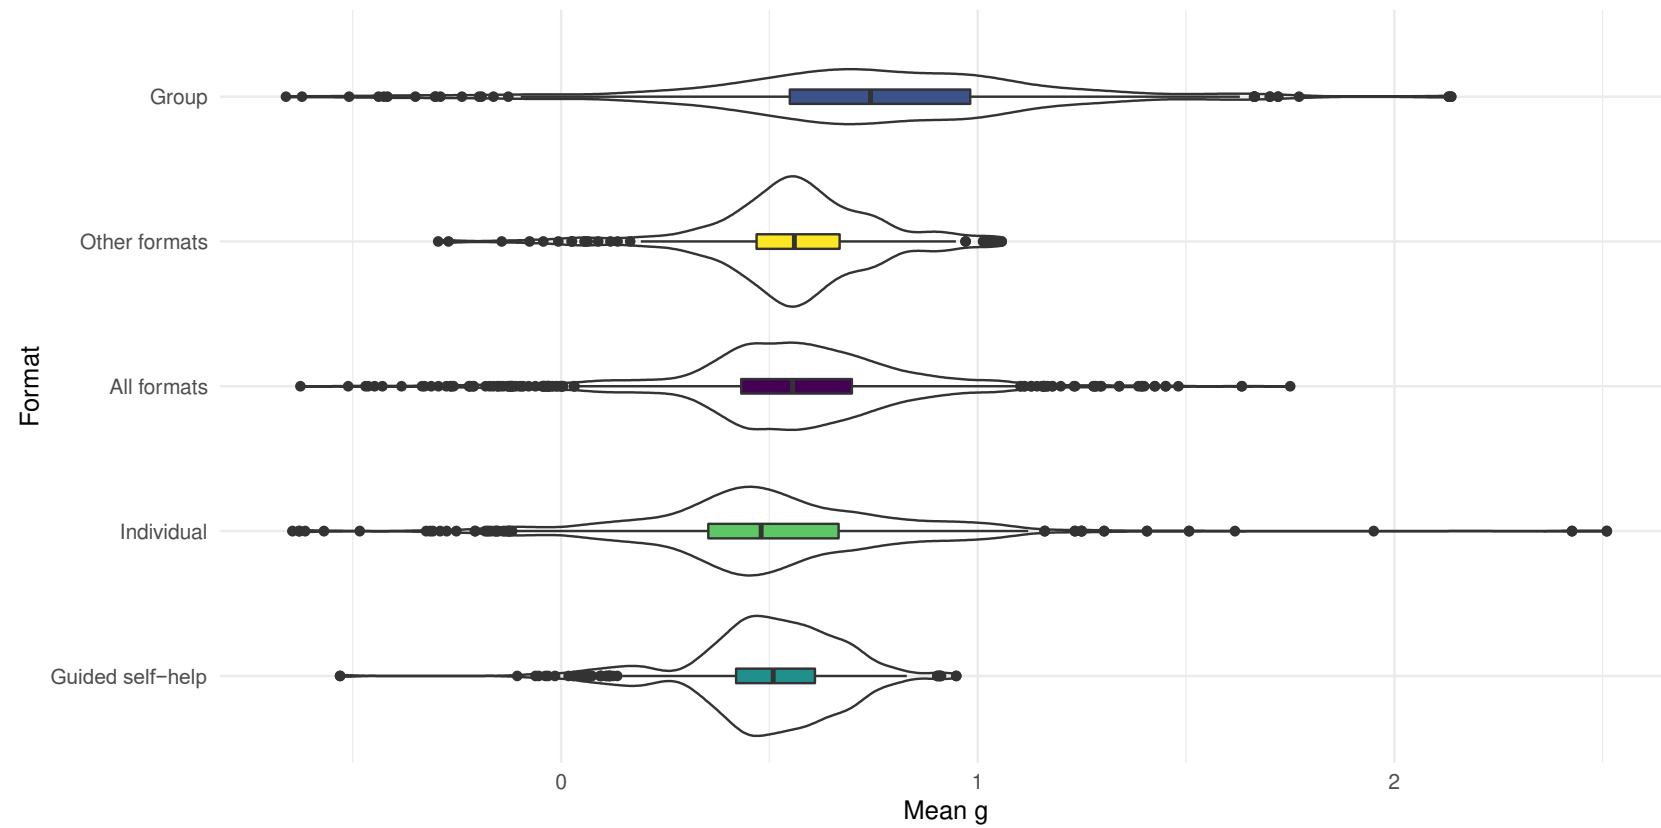

**eFigure 4 Average effect size estimates for Which factor: Method**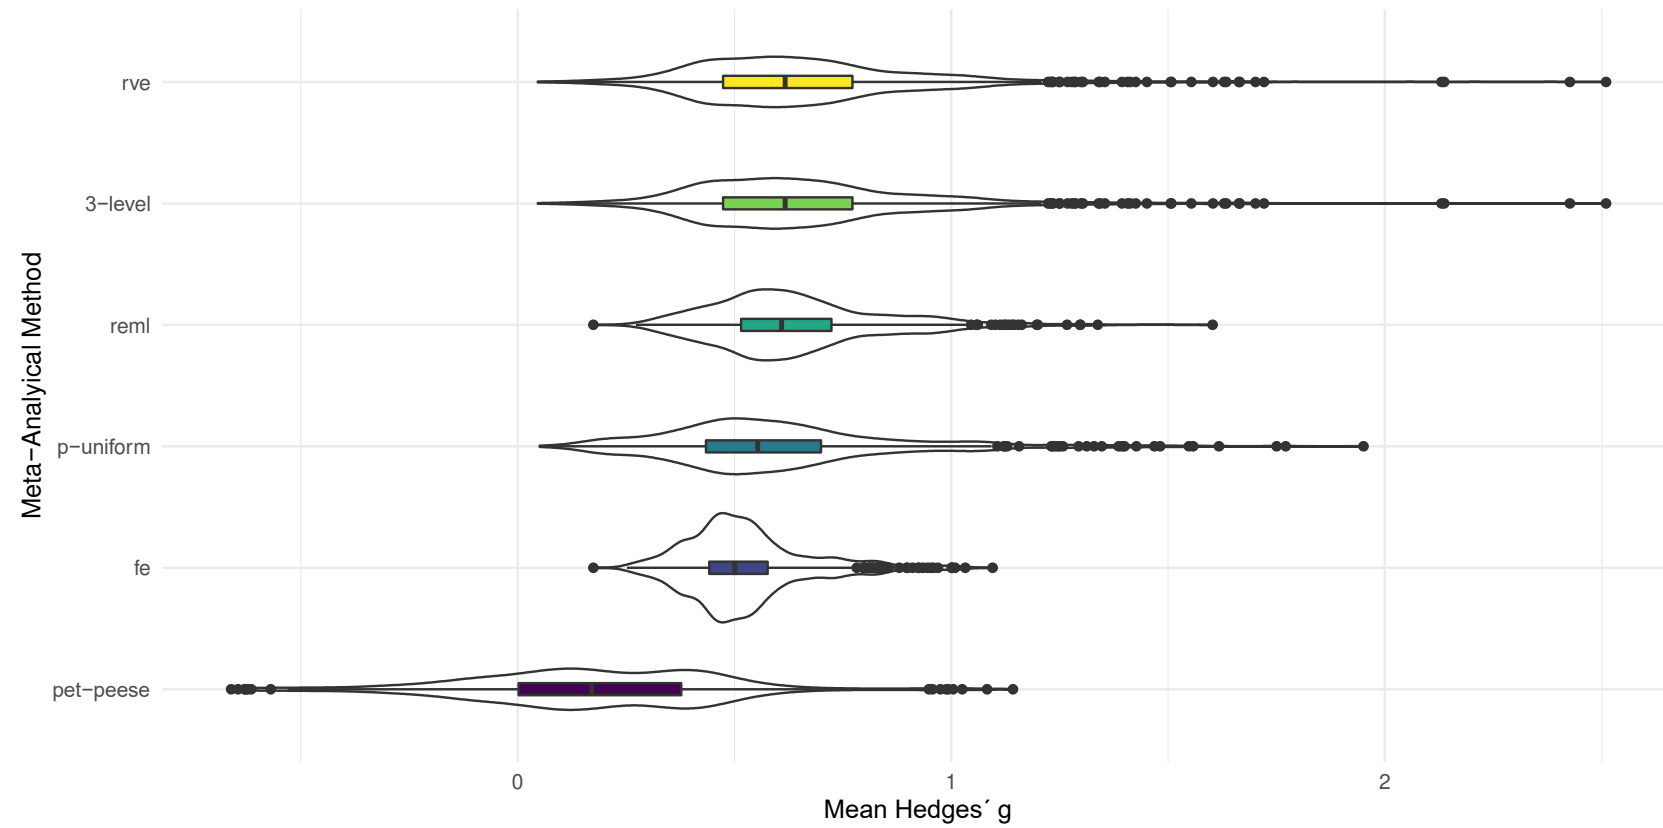

**eFigure 5 Average effect size estimates for Which factor: Type**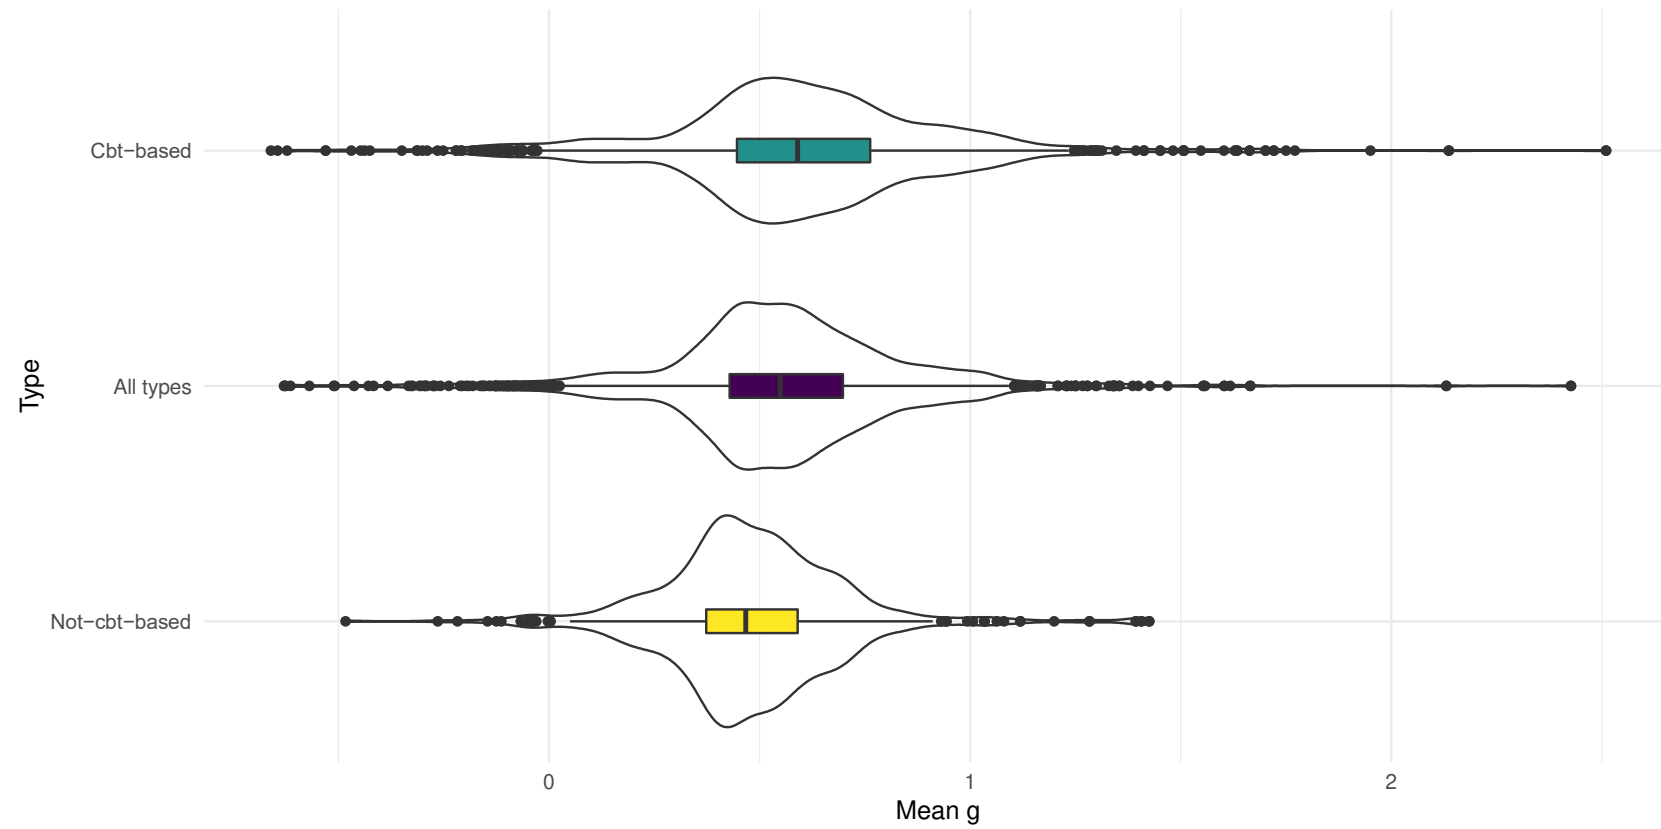



**eFigure 6 Average effect size estimates for Which factor: Risk of bias**

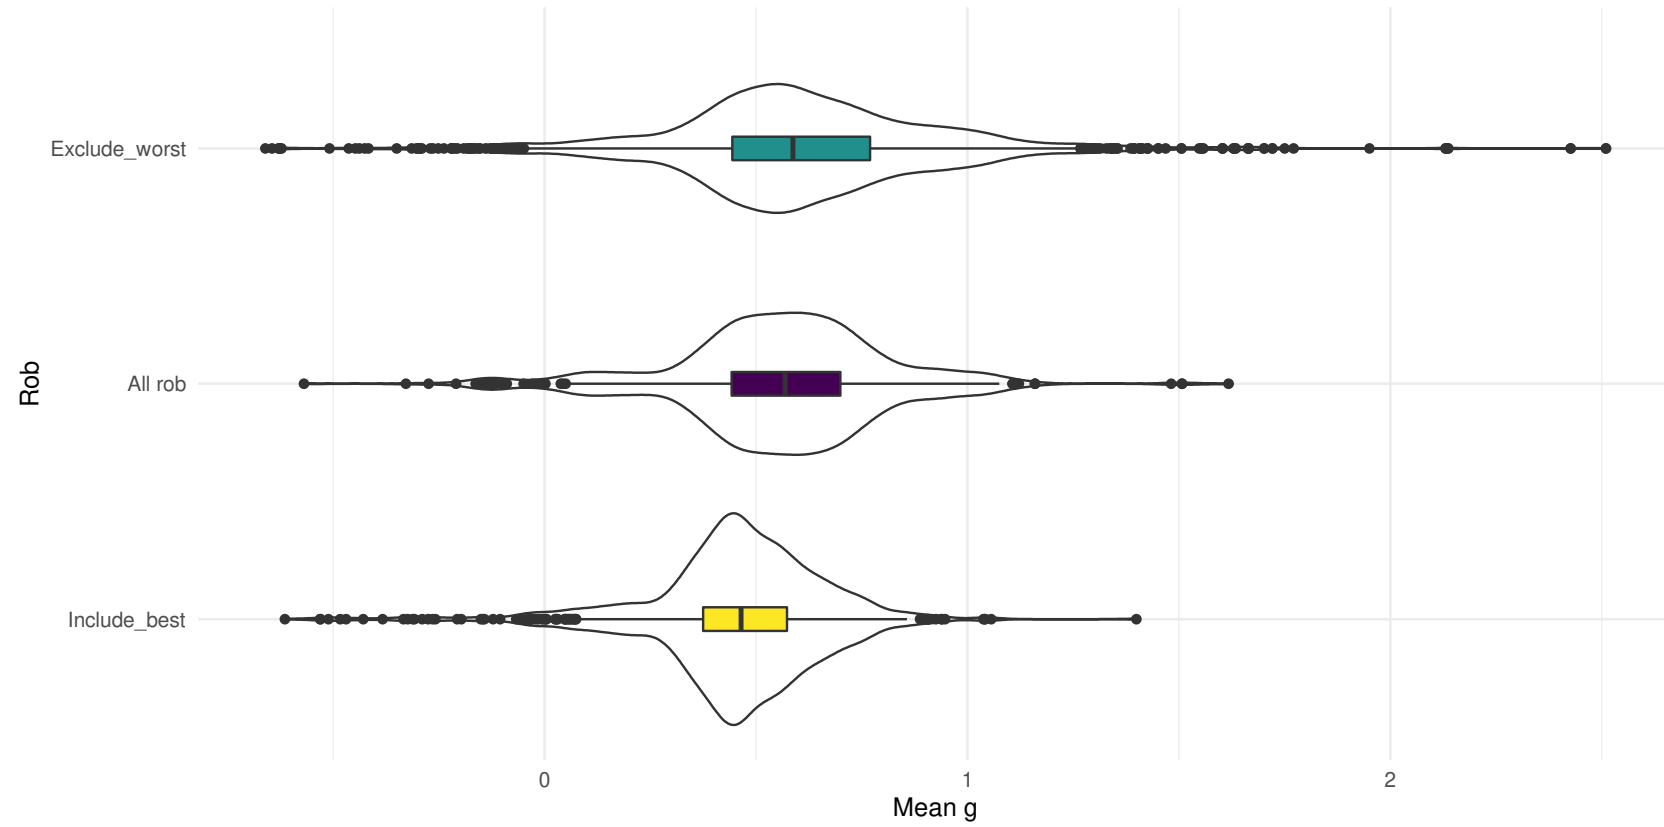

**eFigure 7 Average effect size estimates for Which factor: Target Group**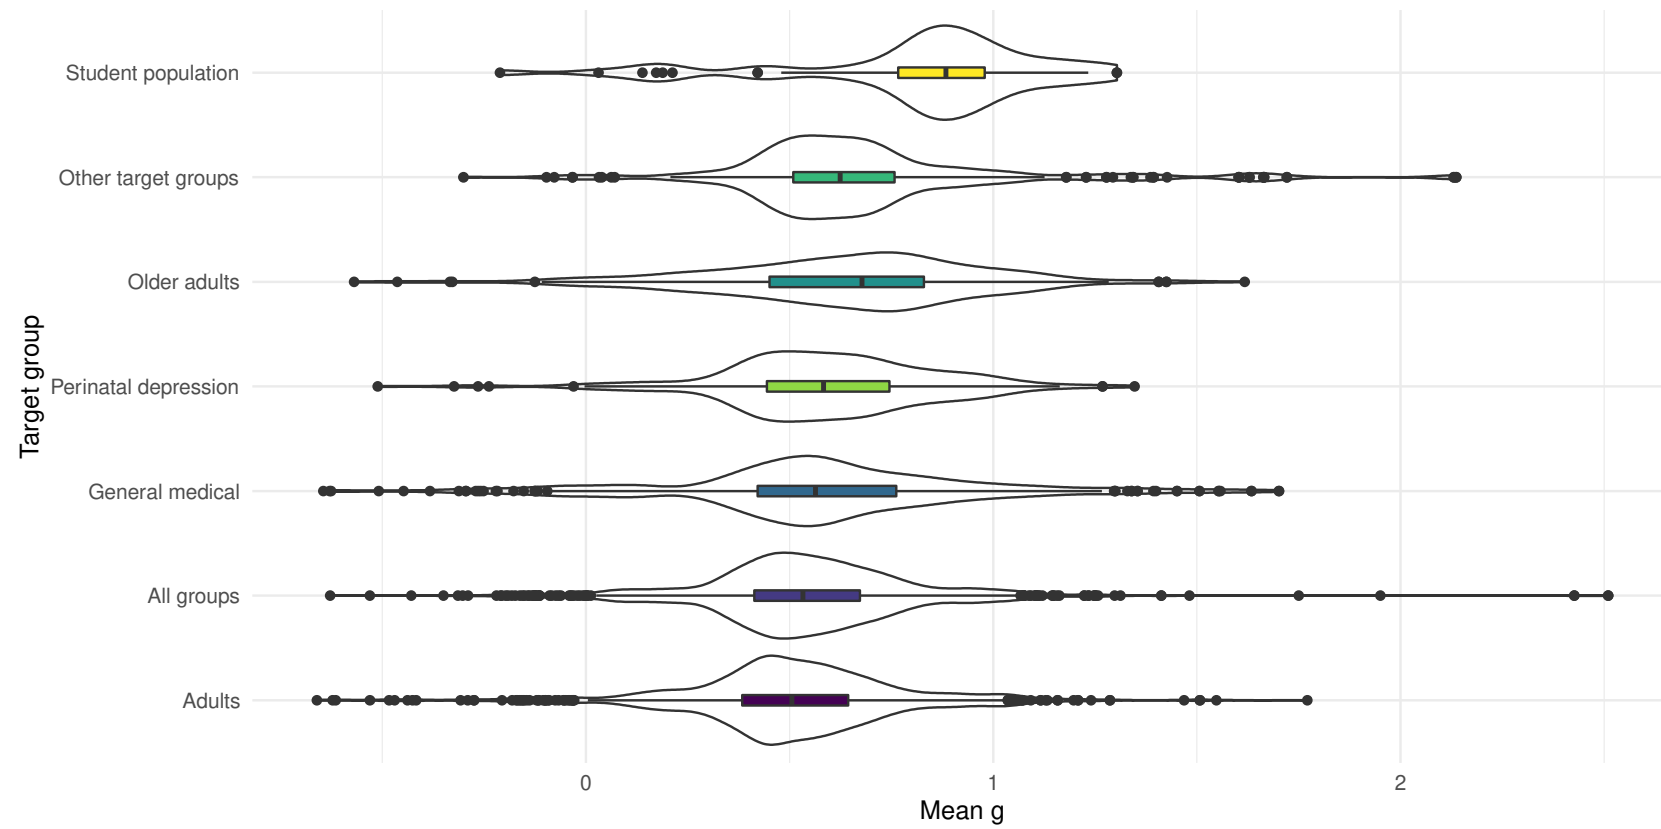

**eFigure 8 Inferential specification curve plot against a simulated clinically relevant effect size**

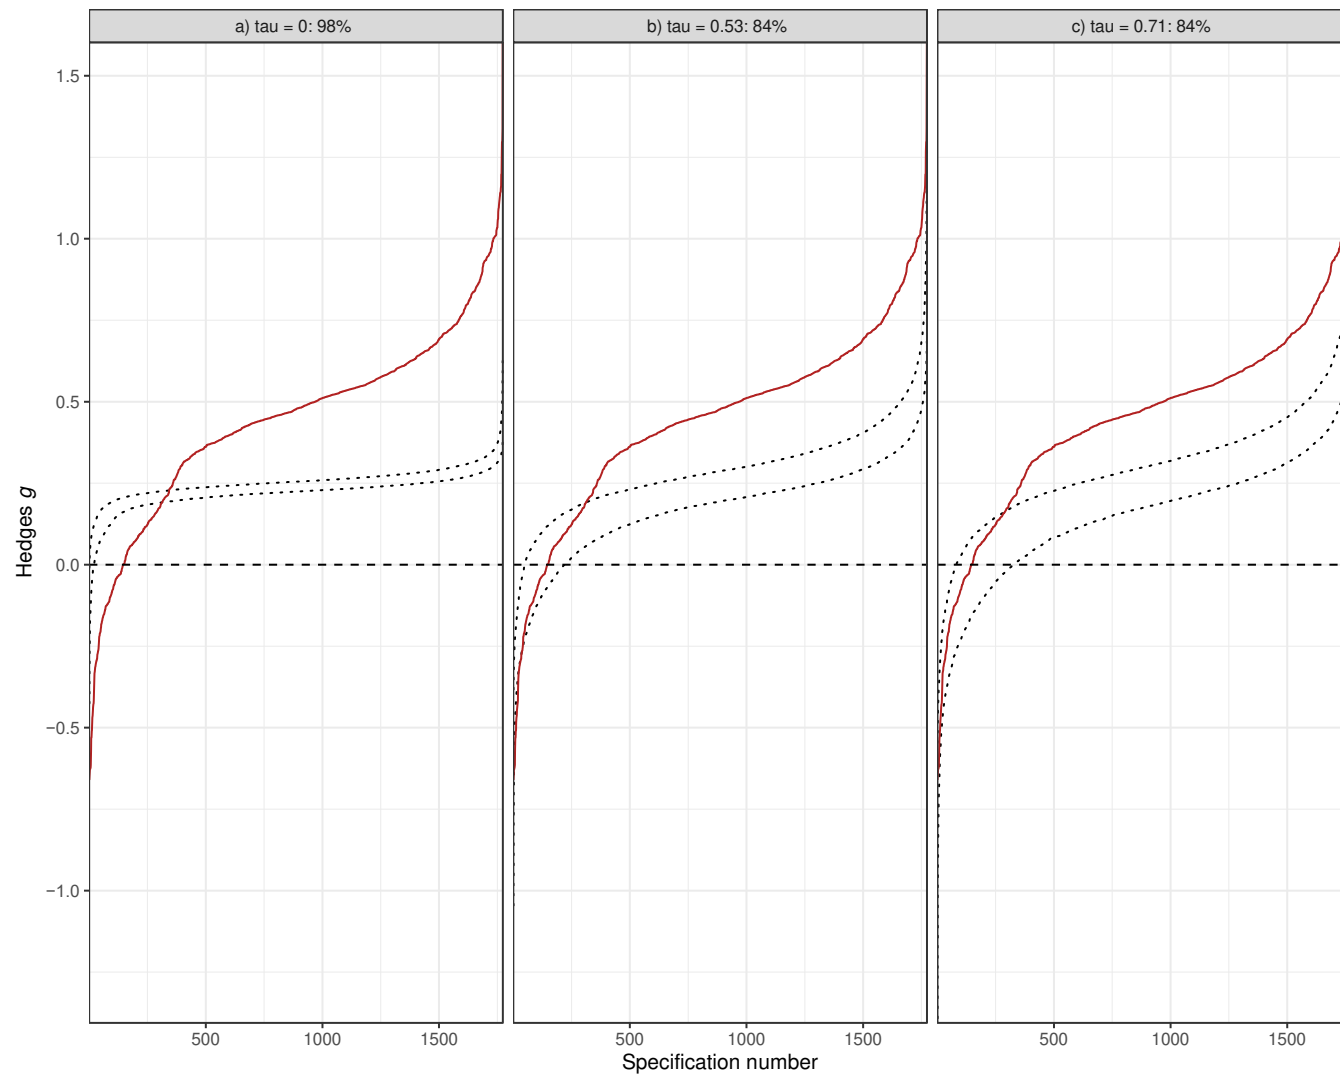

**eFigure 9 Sensitivity analyses for multiverse size**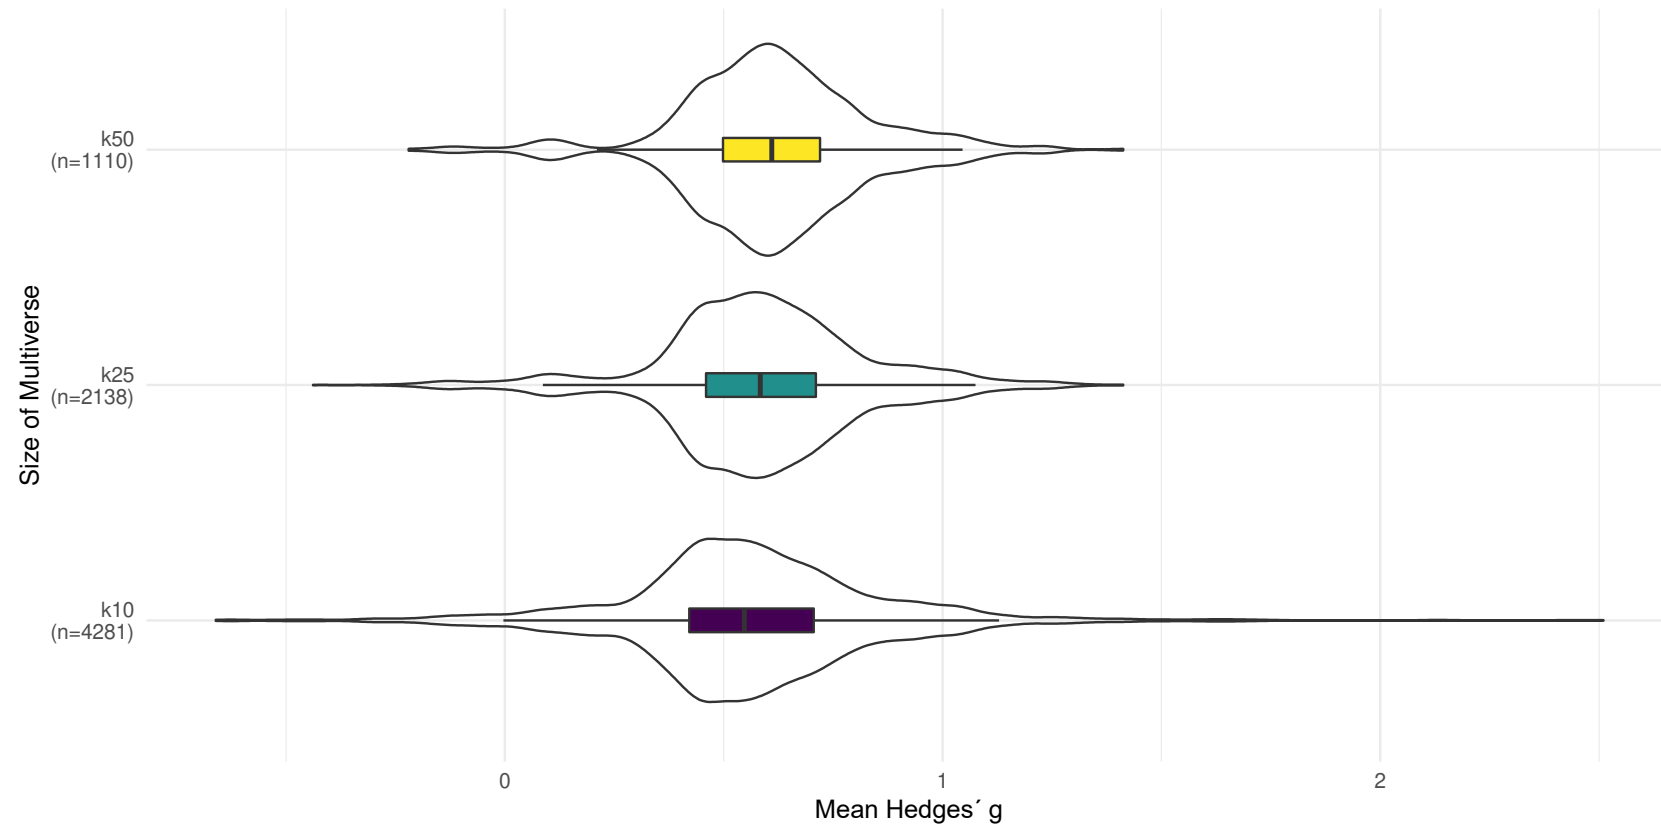

## eMethods

### eMethods 1. Search strings for PubMed.

#### Search strings for four bibliographical databases.

##### PubMed

Psychotherapy [MH] OR psychotherap\*[All Fields] OR cbt[All Fields] OR "behavior therapies"[All Fields] OR "behavior therapy"[All Fields] OR "behavior therapeutic"[All Fields] OR "behavior therapeutical"[All Fields] OR "behavior therapeutics"[All Fields] OR "behavior therapist"[All Fields] OR "behavior therapists"[All Fields] OR "behavior treatment"[All Fields] OR "behavior treatments"[All Fields] OR "behaviors therapies"[All Fields] OR "behaviors therapy"[All Fields] OR "behaviors therapeutics"[All Fields] OR "behaviors therapeutic"[All Fields] OR "behaviors therapeutical"[All Fields] OR "behaviors therapist"[All Fields] OR "behaviors therapists"[All Fields] OR "behaviors treatment"[All Fields] OR "behaviors treatments"[All Fields] OR "behavioral therapies"[All Fields] OR "behavioral therapy"[All Fields] OR "behavioral therapeutics"[All Fields] OR "behavioral therapeutic"[All Fields] OR "behavioral therapeutical"[All Fields] OR "behavioral therapist"[All Fields] OR "behavioral therapists"[All Fields] OR "behavioral treatment"[All Fields] OR "behavioral treatments"[All Fields] OR "behaviour therapies"[All Fields] OR "behaviour therapy"[All Fields] OR "behaviour therapeutic"[All Fields] OR "behaviour therapeutical"[All Fields] OR "behaviour therapist"[All Fields] OR "behaviour therapists"[All Fields] OR "behaviour treatment"[All Fields] OR "behaviour treatments"[All Fields] OR "behaviours therapies"[All Fields] OR "behaviours therapy"[All Fields] OR "behaviours therapeutics"[All Fields] OR "behaviours therapeutic"[All Fields] OR "behaviours therapeutical"[All Fields] OR "behaviours therapist"[All Fields] OR "behaviours therapists"[All Fields] OR "behaviours treatment"[All Fields] OR "behaviours treatments"[All Fields] OR "behavioural therapies"[All Fields] OR "behavioural therapy"[All Fields] OR "behavioural therapeutics"[All Fields] OR "behavioural therapeutic"[All Fields] OR "behavioural therapist"[All Fields] OR "behavioural therapists"[All Fields] OR "behavioural treatment"[All Fields] OR "behavioural treatments"[All Fields] OR "cognition therapies"[All Fields] OR "cognition therapie"[All Fields] OR "cognition therapy"[All Fields] OR "cognition therapeutical"[All Fields] OR "cognition therapeutic"[All Fields] OR "cognition therapeutics"[All Fields] OR "cognition therapist"[All Fields] OR "cognition therapists"[All Fields] OR "cognition treatment"[All Fields] OR "cognition treatments"[All Fields] OR psychodynamic[All Fields] OR Psychoanalysis[MH] OR psychoanalysis[All Fields] OR psychoanalytic\*[All Fields] OR counselling[All Fields] OR counseling[All Fields] OR Counseling[MH] OR "problem-solving"[All Fields] OR mindfulness[All Fields] OR



"affective disorders"[All Fields] OR "mood disorder"[All Fields] OR "mood disorders"[All Fields] OR depression\*[All Fields] OR depressive\*[All Fields] OR "dysthymic disorder"[MeSH Terms])  
Limits: RCTs

### Embase

#1

'psychotherapy'/exp OR 'psychotherapy' OR 'psychotherapies' OR 'psychotherapeutics' OR 'psychotherapeutical' OR 'cognitive therapy'/exp OR 'cognitive behavior therapy'/exp OR 'behavior therapy'/exp OR 'cognitive behavioural therapy' OR 'cognitive behavioural therapies' OR 'cognitive behavioral therapy' OR 'cognitive behavioral therapies' OR 'behavior therapy' OR 'behavior therapies' OR 'behaviour therapy' OR 'behaviour therapies' OR 'cognition therapy' OR 'cognitive therapies' OR 'cognitive therapy' OR 'cognitive therapeutic' OR 'cognitive therapeutics' OR 'cognitive therapeutical' OR 'cognitive therapist' OR 'cognitive therapists' OR 'cognitive treatment' OR 'cognitive treatments' OR 'cognitive restructuring' OR 'cognition therapies' OR 'cognition therapie' OR 'cognition therapeutical' OR 'cognition therapeutic' OR 'cognition therapeutics' OR 'cognition therapist' OR 'cognition therapists' OR 'cognition treatment' OR 'cognition treatments' OR 'behavior therapeutic' OR 'behavior therapeutical' OR 'behavior therapeutics' OR 'behavior therapist' OR 'behavior therapists' OR 'behavior treatment' OR 'behavior treatments' OR 'behaviors therapies' OR 'behaviors therapy' OR 'behaviors therapeutics' OR 'behaviors therapeutic' OR 'behaviors therapeutical' OR 'behaviors therapist' OR 'behaviors therapists' OR 'behaviors treatment' OR 'behaviors treatments' OR 'behavioral therapies' OR 'behavioral therapy' OR 'behavioral therapeutics' OR 'behavioral therapeutical' OR 'behavioral therapist' OR 'behavioral therapists' OR 'behavioral treatment' OR 'behavioral treatments' OR 'behaviour therapeutic' OR 'behaviour therapeutical' OR 'behaviour therapeutics' OR 'behaviour therapist' OR 'behaviour therapists' OR 'behaviour treatment' OR 'behaviour treatments' OR 'behaviours therapies' OR 'behaviours therapy' OR 'behaviours therapeutics' OR 'behaviours therapeutical' OR 'behaviours therapist' OR 'behaviours therapists' OR 'behaviours treatment' OR 'behaviours treatments' OR 'behavioural therapies' OR 'behavioural therapy' OR 'behavioural therapeutics' OR 'behavioural therapeutical' OR 'behavioural therapist' OR 'behavioural therapists' OR 'behavioural treatment' OR 'behavioural treatments' OR 'behavior activation' OR 'behaviors activation' OR 'behavioral activation' OR 'behaviour activation' OR 'behaviours activation' OR 'behavioural activation' OR 'psychoanalytic therapy'/exp OR 'psychodynamic' OR 'psychodynamical' OR 'psychoanalysis' OR 'psychoanalytical' OR 'counselling'/exp OR 'counseling'/exp OR 'counselling' OR 'counseling' OR 'problem-solving' OR 'problem solving' OR 'supportive therapy' OR 'metacognitive therapy' OR 'metacognitive therapies' OR 'metacognitive therapeutic' OR 'metacognitive therapeutics' OR 'metacognitive therapeutical' OR 'metacognitive therapist' OR 'metacognitive therapists' OR 'metacognitive treatment' OR 'metacognitive treatments' OR 'meta-cognitive therapy' OR 'meta-cognitive therapies' OR



'meta-cognitive  
 therapeutic' OR 'meta-cognitive therapeutics' OR 'meta-cognitive therapeutical' OR 'meta-cognitive  
 therapist' OR  
 'meta-cognitive therapists' OR 'meta-cognitive treatment' OR 'meta-cognitive treatments' OR  
 'solution-focused  
 therapies' OR 'solution focused therapies' OR 'solution-focussed therapies' OR 'solution focused  
 therapies' OR 'solution-  
 focused therapy' OR 'solution focused therapy' OR 'solution-focussed therapy' OR 'solution focused  
 therapy' OR  
 'solution-focused therapeutic' OR 'solution focused therapeutic' OR 'solution-focussed therapeutic' OR  
 'solution  
 focussed therapeutic' OR 'solution-focused therapeutics' OR 'solution focused therapeutics' OR  
 'solution-focussed  
 therapeutics' OR 'solution focused therapeutics' OR 'solution-focused therapeutical' OR 'solution  
 focused therapeutical'  
 OR 'solution-focussed therapeutical' OR 'solution focused therapeutical' OR 'self-control therapies' OR  
 'self control  
 therapies' OR 'self-control therapy' OR 'self control therapy' OR 'self-control therapeutics' OR 'self  
 control therapeutics'  
 OR 'self-control therapeutical' OR 'self control therapeutical' OR 'self-control therapeutic' OR 'self  
 control therapeutic'  
 OR 'self-control training' OR 'self control training' OR 'self control trainings' OR 'self-control trainings'  
 OR  
 'mindfulness' OR 'acceptance commitment' OR 'acceptance and commitment' OR 'assertiveness training'  
 #2  
 'compassion-focused' OR 'compassion-focussed' OR 'compassion focused' OR 'compassion focussed'  
 OR 'constructivist'  
 OR 'constructivists'  
 #3  
 'therapies' OR 'therapy' OR 'therapeutics' OR 'therapist' OR 'treatment' OR 'treatments'  
 #4  
 Combine: #2 AND #3  
 #5: #1 OR #4  
 #6  
 'depressive disorder'/exp OR 'depression'/exp OR 'depressive' OR 'major depression'/exp OR 'major  
 depressive  
 disorder'/exp OR 'depression' OR 'depressions' OR 'depressive' OR 'dysthymic disorder'/exp OR  
 'dysthymic disorder'  
 OR 'dysthymia'/exp OR 'dysthymic' OR 'mood disorder'/exp OR 'affective disorder'/exp OR 'affective  
 disorder' OR  
 'affective disorders' OR 'mood disorder' OR 'mood disorders'  
 Combine: #5 AND #6  
 Limits: RCTs  
 PsycINFO  
 (DE "Psychotherapy" OR "Psychotherapy" OR "psychotherapies" OR "psychotherapeutic" OR  
 "psychotherapeutical"  
 OR "psychotherapeutics" OR DE "Behavior Therapy" OR DE "Cognitive Behavior Therapy" OR  
 "CBT" OR "behavior  
 therapies" OR "behavior therapy" OR "behavior therapeutic" OR "behavior therapeutical" OR  
 "behavior therapeutics"  
 OR "behavior therapist" OR "behavior therapists" OR "behavior treatment" OR "behavior  
 treatments" OR  
 "behaviors therapies" OR "behaviors therapy" OR "behaviors therapeutics" OR "behaviors therapeutic"  
 OR "behaviors  
 therapeutical" OR "behaviors therapist" OR "behaviors therapists" OR "behaviors treatment" OR  
 "behaviors  
 treatments" OR "behavioral therapies" OR "behavioral therapy" OR "behavioral therapeutics" OR  
 "behavioral  
 therapeutic" OR "behavioral therapeutical" OR "behavioral therapist" OR "behavioral therapists"  
 OR "behavioral

treatment" OR "behavioral treatments" OR "behaviour therapies" OR "behaviour therapy" OR "behaviour therapeutic"  
OR "behaviour therapeutical" OR "behaviour therapeutics" OR "behaviour therapist" OR "behaviour therapists"  
OR "behaviour treatment" OR "behaviour treatments" OR "behaviours therapies" OR "behaviours therapy" OR  
"behaviours therapeutics" OR "behaviours therapeutic" OR "behaviours therapeutical" OR "behaviours therapist"  
OR "behaviours therapists" OR "behaviours treatment" OR "behaviours treatments" OR  
"behavioural therapies" OR  
"behavioural therapy" OR "behavioural therapeutics" OR "behavioural therapeutic" OR "behavioural therapeutical" OR  
"behavioural therapist" OR "behavioural therapists" OR "behavioural treatment" OR "behavioural treatments" OR  
"cognition therapies" OR "cognition therapie" OR "cognition therapy" OR "cognition therapeutical" OR  
"cognition therapeutic" OR "cognition therapeutics" OR "cognition therapist" OR "cognition therapists" OR  
"cognition treatment" OR "cognition treatments" OR "cognitive therapies" OR "cognitive therapy" OR "cognitive therapeutic" OR  
"cognitive therapeutics" OR "cognitive therapeutical" OR "cognitive therapist" OR "cognitive therapists" OR  
"cognitive treatment" OR "cognitive treatments" OR "cognitive restructuring" OR DE "Emotion Focused Therapy" OR  
DE "Psychoanalysis" OR "psychoanalysis" OR "psychoanalytic" OR "psychoanalytical" OR DE  
"Psychodynamic Psychotherapy" OR "psychodynamic" OR DE "Psychotherapeutic Counseling" OR "counseling" OR  
"counseling" OR  
"problem-solving" OR "problem solving" OR "mindfulness" OR ("acceptance" AND "commitment")  
OR "assertiveness training" OR "behavior activation" OR "behaviors activation" OR "behavioral activation" OR  
"behaviour activation"  
OR "behaviours activation" OR "behavioural activation" OR "metacognitive therapies" OR  
"metacognitive therapy" OR  
"metacognitive therapeutic" OR "metacognitive therapeutics" OR "metacognitive therapeutical" OR  
"metacognitive therapist" OR "metacognitive therapists" OR "metacognitive treatment" OR "metacognitive treatments" OR  
"meta-cognitive therapies" OR "meta-cognitive therapy" OR "meta-cognitive therapeutic" OR "meta-cognitive therapeutics" OR "meta-cognitive therapeutical" OR "meta-cognitive therapist" OR "meta-cognitive therapists"  
OR "meta-cognitive treatment" OR "meta-cognitive treatments" OR DE "Solution Focused Therapy" OR "solution-focused therapies" OR "solution-focused therapy" OR "solution-focused therapeutic" OR "solution-focused therapeutics" OR "solution-focused therapeutical" OR "solution-focussed therapies" OR "solution-focussed therapy" OR "solution-focussed therapeutic" OR "solution-focussed therapeutics" OR "solution-focussed therapeutical" OR  
"solution focused therapies" OR "solution focused therapy" OR "solution focused therapeutic" OR  
"solution focused therapeutics" OR "solution focused therapeutical" OR "solution focussed therapies" OR "solution focussed therapy" OR  
"solution focussed therapeutic" OR "solution focussed therapeutics" OR "solution focussed therapeutical" OR "self-control therapies" OR "self-control therapy" OR "self-control therapeutics" OR "self-control therapeutical" OR "self-control therapeutic" OR "self-control training" OR "self-control trainings" OR "self control therapies" OR "self control"

therapy" OR "self control therapeutics" OR "self control therapeutical" OR "self control therapeutic"  
 OR "self control  
 training" OR "self control trainings" OR (("compassion-focused" OR "compassion-focussed" OR  
 "compassion focused"  
 OR "compassion focussed") AND ("therapies" OR "therapy" OR "therapie" OR "therapist" OR  
 "therapists" OR  
 "therapeut" OR "treatment" OR "treatments")) OR ("constructivist" AND ("therapies" OR "therapy" OR  
 "therapie" OR  
 "therapist" OR "therapists" OR "therapeut" OR "treatment" OR "treatments"))))  
 AND  
 (DE "Depression (Emotion)" "depressive disorder" OR "depression" OR "depressions" OR "depressive"  
 OR DE "Major  
 Depression" OR "major depression" OR "major depressive disorder" OR DE "Dysthymic Disorder" OR  
 "Dysthymia"  
 OR " dysthymic disorder" OR DE "Affective Disorders" OR "Affective Disorder" OR "affective  
 disorders" OR "Mood  
 Disorder" OR "Mood disorders")  
 Limits: Methodology is ME=(treatment outcome/clinical trial): papers (December 2014)

### Cochrane

#1 MeSH descriptor: [Depressive Disorder] explode all trees : 6, 777  
 #2 "depress\*" (Word variations have been searched) : 51, 768  
 #3 #1 or #2 : 51, 783  
 #4 "major depressive disorder" (Word variations have been searched) : 5, 435  
 #5 #3 or #4 : 51, 783  
 #6 MeSH descriptor: [Dysthymic Disorder] explode all trees : 129  
 #7 "dysthymi\*" (Word variations have been searched) : 649  
 #8 #6 or #7 : 649  
 #9 #5 or #8 : 51, 800  
 #10 "mood disorder" (Word variations have been searched) :4, 034  
 #11 "affective disorder" (Word variations have been searched) : 2, 882  
 #12 #10 or #11 : 6, 055  
 #13 #9 or #12 : 53, 227  
 #14 MeSH descriptor: [Psychotherapy] explode all trees : 13, 568  
 #15 "psychotherap\*" (Word variations have been searched) : 7, 758  
 #16 "CBT" (Word variations have been searched) : 2, 029  
 #17 "Cognitive Behav\* therap\*" (Word variations have been searched) : 8, 893  
 #18 #14 or #15 or #16 or #17 : 20, 795  
 #19 "psychodynamic" (Word variations have been searched) : 469  
 #20 MeSH descriptor: [Psychoanalysis] explode all trees : 13  
 #21 "psychoanaly\*" (Word variations have been searched) : 345  
 #22 MeSH descriptor: [Counseling] explode all trees : 2, 783  
 #23 "counseling\*" (Word variations have been searched) : 6, 913  
 #24 "problem solving" (Word variations have been searched) : 2, 867  
 #25 #18 or #19 or #20 or #21 or #22 or #23 or #24 : 28, 149  
 #26 "acceptance commitment" (Word variations have been searched) : 168  
 #27 "assertiveness training" (Word variations have been searched) :231  
 #28 "behavior activation" (Word variations have been searched) : 663  
 #29 "mindfulness" (Word variations have been searched) : 466  
 #30 "metacognitive therap\*" (Word variations have been searched) :56  
 #31 "solution focused therap\*" (Word variations have been searched) :858  
 #32 "self control training" (Word variations have been searched): 5850  
 #33 #25 or #26 or #27 or #28 or #29 or #30 or #31 or #32 : 32, 748  
 #34 "Randomized Controlled Trial":ti,ab,kw (Word variations have been searched) : 120, 901  
 #35 #13 and #33 and #34 in Trials: 4,614  
 Limit: publication year: 1970-2018

## **eMethods 2. Detailed list of Which Factors.**

### **Target group**

These seven target groups receiving treatment for depression were included: 1) adults (adults in general with no specific demographic characteristic), 2) general medical group, 3) student populations, 4) women suffering from perinatal depression, 5) older adults, 6) other groups, or 7) all these target groups.

### **Type**

We compared interventions for different types of therapies: 1) CBT-based therapies (cognitive behavior therapy, problem-solving therapy, third-wave cognitive therapies, behavioral activation therapy, nondirective supportive therapy, 2) non-CBT-based therapies (psychodynamic therapy, interpersonal therapy, life review therapy, other types of therapy), or 3) all types of therapy.

### **Format**

Interventions could be delivered in 1) group, 2) individual, 3) guided self-help, or 4) other formats (e.g. couples therapy).

### **Diagnosis**

We compared interventions that based their inclusion of participants on different types of diagnoses. These specifications include 1) clinical diagnosis (including mood disorder, chronic depression), or 2) scoring above a clinically relevant cutoff score, 3) subclinical depression or 4) all diagnoses.

### **Control conditions**

We compared interventions for different types of control conditions. These specifications include: 1) care as usual, 2) waiting list, 3) other control conditions, or 4) all types of control conditions.

### **Risk of bias**

We compared studies with different degrees of risk of bias assessed with the risk of bias assessment tool, which assesses possible sources of bias, such as the adequate generation of allocation sequence, the concealment of allocation to conditions, the prevention of knowledge of the allocated intervention, and dealing with incomplete outcome data. We decided to include meta-analyses that were either restrictive in allowing 1) only low risk of bias studies, 2) less restrictive in including all but high risk of bias studies, or 3) meta-analyses including all studies, regardless of bias assessment.

### eMethods 3. Deviations from protocol.

We deviated in four instances from our protocol to ensure the interpretability of our visualizations. In most cases, we reduced *Which* factor categories to broader categories as those categories did not contain enough studies to include in our analyses:

First, we combined psychological interventions into either CBT-based or not-CBT based interventions; Second, we also included couples therapy in the other therapy format category. Third, we did not include two risk of bias assessments (some concern or high risk) as reasonable specifications. Forth, we combined USA and Canada to a new region called North America and included the UK in Europe.

**Furthermore, we also included two new *How* factors (3-level and PET-PEESE to account for effect size dependency, included PET-PEESE as an additional method to inspect publication bias, and excluded the unweighted estimate, as this does not seem reasonable to us anymore.**

The text from our protocol is *italic*, the changes we made is **bold**.

*Which factors: Which data to analyze?*

*The decisions of which groups to compare in a meta-analysis are manifold; we decided to specify the following seven relevant study features:*

- *Target group. Researchers may decide to compare specific populations only. Included are the categories: 1) adults (adults in general with no specific demographic characteristic), 2) general medical group, 3) perinatal depression, 4) student population, 5) older adults, 6) other groups, or 7) all target groups.*
- *Format. Researchers might compare interventions for different types of therapy delivery: 1) group, 2) individual, 3) guided self-help, 4) couples, 5) telephone, 6) other formats, or 7) all formats. → We also included couples therapy in the other therapy format category.*
- *Diagnosis. We compare interventions that based their inclusion of participants on different types of diagnoses. These specifications include the following diagnoses: 1). major depression according to criteria by DSM-V, DSM-IV, DSM-III- R, DSM-III, Research Diagnostic Criteria (RDC) for major depression, or Feighner criteria for depressive disorder. We will also include diagnoses of 2.) mood disorder or other diagnosed disorders (e.g., dysthymia; depression Not Otherwise Specified (NOS); minor depression according to Research Diagnostic Criteria). 3). Chronic depression, i.e., participants meet criteria for chronic or treatment-resistant depression, according to any definition given by the authors of the study. We also include diagnoses defined as 4). scoring above a clinically relevant cutoff score, or 5) diagnosed subclinical depression, i.e. participants score above a cut-off on a self-rating scale, but do not meet criteria for a depressive disorder according to a diagnostic interview (such as the MINI, CIDI or SCID).*
- *Type. Researchers might compare interventions for different types of therapies: 1) cognitive behavior therapy, 2) problem-solving therapy, 3) third-wave cognitive therapies, 4) behavioral activation therapy, 5) nondirective supportive therapy, 6) psychodynamic therapy, 7) interpersonal therapy, 8) life review therapy, 9) other types of therapy, or 10) all types of therapy. → We combined these psychological interventions into either 1) CBT-based or 2) not-CBT based interventions.*
- *Control conditions. Researchers might compare interventions for different types of control conditions. These specifications include: 1) care as usual, 2) waiting list, 3) other types of control conditions, or 4) all types of control conditions.*
- *Country. Researchers might compare studies conducted in different regions: 1) EU, 2) the USA, 3) the UK, 4) Canada, 5) East Asia, 6) Australia, 7) other countries, or 8) all countries. → We combined USA and Canada to a new region called North America and included the UK in Europe.*
- *Risk of bias. Researchers might compare studies with different degrees of risk of bias assessed with the risk of bias assessment tool.<sup>416</sup> Based on the assessment of allocation concealment, blinding of assessors, intention-to-treat analyses, and sequence generation, we will create a dichotomous variable indicating whether the study is graded as 1) low risk of bias (if each aspect is rated as low risk) or 2) some concern (if any or all aspects are rated as high risk). We will also include a specification including 3) all studies, regardless of bias assessment. → We did not include two risk of bias assessments (some concern or high risk) as reasonable specifications.*
